# Supplementary material for: Testing Convergent Evolution in Auditory Processing Genes between Echolocating Mammals and the Aye-Aye, a Percussive-Foraging Primate
Source: PubMed Central journal article supplement — Genome Biol Evol. 2017 Jul 26;9(7):1978–89. doi: 10.1093/gbe/evx140 (PMC5553384; doi:10.1093/gbe/evx140), 2017-07-26

# Supplemental Figure 1

Ratio of the number of convergent : divergent amino acids with outgroup species in the phylogeny for indicated species 1 : species 2 pairs, summed across seven auditory processing genes

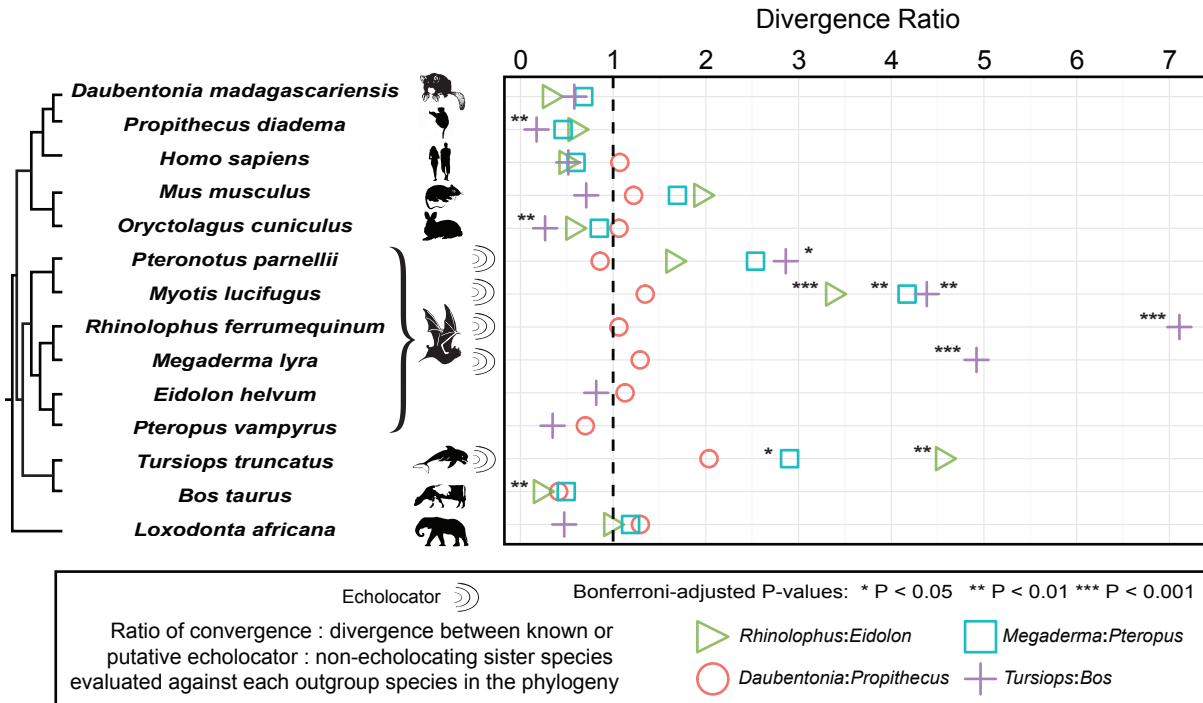

Supplement: evx140_SuppFig_1.pdf [file evx140_SuppFig_1.pdf]
