# Supplementary material for: Testing Convergent Evolution in Auditory Processing Genes between Echolocating Mammals and the Aye-Aye, a Percussive-Foraging Primate
Source: PubMed Central journal article supplement — Genome Biol Evol. 2017 Jul 26;9(7):1978–89. doi: 10.1093/gbe/evx140 (PMC5553384; doi:10.1093/gbe/evx140), 2017-07-26
Supplement: evx140_SuppFig_2.pdf [file evx140_SuppFig_2.pdf]

**Supplemental Figure 2. Alignments between scaffolds containing more than one disagreement with the BEAT consensus sequence, the BEAT consensus, and the human reference.** Scaffolds that meet these criteria were found to belong to two categories: likely paralogs, and possible assembly errors. Paralogs are indicated when the entire sequence can be reconstructed from shotgun sequence reads, while assembly errors are marked by regions of scaffold-read disagreement. All alignments to scaffolds shown were conducted with BWA-MEM (Li 2013), and used only the original reads from Perry, Reeves et al. (2012). Titles with a light blue border indicate likely paralogs, while titles with a red border indicate possible assembly error.



# CDH23 Scaffold with disagreement 2

|                                  |                                                                                                                                                                                                                                                                                                                                                                                                                                                                                                                                                                                                                                                                                                                                                                                                         |
|----------------------------------|---------------------------------------------------------------------------------------------------------------------------------------------------------------------------------------------------------------------------------------------------------------------------------------------------------------------------------------------------------------------------------------------------------------------------------------------------------------------------------------------------------------------------------------------------------------------------------------------------------------------------------------------------------------------------------------------------------------------------------------------------------------------------------------------------------|
| <b>Human</b>                     | ATGCTGGTGGGGATCCGGGTGCTGGACATCAACGACAACGACCCCTGTGCTGAACCTGCCCATGAACATCACCATCAGCGAGAAGACGCCCTGTCTCCAGCTTTGTCGCCATGTCTGGCCAGTGACCTGACAGTGGCTGCAATGACGCCTCACCTTCAACATCACTGCGGCAACCGCGAGCGGGCCTTCTT                                                                                                                                                                                                                                                                                                                                                                                                                                                                                                                                                                                                         |
| <b>BEAT</b>                      | ATGTTGGTGGGGATCCGGGTGCTGGATATCAACGACAACGACCCCGTGTGCTGAACCTGCCCATGAACATCACCATCAGTGAGAAGACGCCCTGTCTCCAGCTTTGTCGCCACATCTGGCCAGCGATGACAGAGTGGCTGCAACGCGCTCACCTTCAACATCACTGCAGGCAACCGCGAGCGGGCCTTCTC                                                                                                                                                                                                                                                                                                                                                                                                                                                                                                                                                                                                         |
| <b>Scaffold</b>                  | <div style="display: flex; justify-content: space-between; font-size: small;"> <span>1</span> <span>11</span> <span>21</span> <span>31</span> <span>41</span> <span>51</span> <span>61</span> <span>71</span> <span>81</span> <span>91</span> <span>101</span> <span>111</span> <span>121</span> <span>131</span> <span>141</span> <span>151</span> <span>161</span> <span>171</span> <span>181</span> <span>191</span> </div> <p>ATGTTGGTGGGGATCCGGGTGCTGGATATCAACGACAACGACCCCGTGTGCTGAACCTGCCCATGAACATCACCATCAGTGAGAAGACGCCCTGTCTCCAGCTTTGTCGCCACATCTGGCCAGCGATGACAGAGTGGCTGCAATGACGCCTCACCTTCAACATCACTGCAGGCAACCGCGAGCGGGCCTTCTT</p>                                                                                                                                                                 |
| <b>BWA alignment to scaffold</b> | <pre> .....,c,t,,,a,,,,,tg,a,,,,,c,g,t,,,,, .....T.....G.....T..... .....C.....C,T.....A.....TG,A.....A,G..... .....C,g,C,,,,,t,,,,,C,,,,,C,t,,,a,,,,, .....t,C,,,,,gt,,,,,C,g,C,t,,,a,,,,,tg,a,,,,, .....C.....C,T.....A.....TG,C.....C..... .....C.....C,T.....A.....C.....C,T..... .....g,t,,,g,,,,,C,,,,,C,t,,,a,,,,,tg,a,,,,, .....C.....C,T.....C,g,t,,,,, .....C,,,,,g,,,,,a,,,,,tg,a,,,,,c,g,t,,,,, .....C,,,,,C,t,,,a,,,,,g,,,,,C,,,,,C,t,,,a,,,,, .....C.....C,T.....A.....g,,,,,C,,,,,C,t,,,a,,,,, .....C.....C,T.....A.....A.....TG,A.....C,g,T.....C..... .....a,t,,,,,C,,,,,C,t,,,a,,,,, .....g,,,,,C,,,,,C,t,,,a,,,,, .....C.....C,T.....A..... .....C.....C,T.....A..... .....C..... .....C,,,,,C,t,,,a,,,,,tg,a,,,,, .....C,,,,,C,t,,,a,,,,,tg,a,,,,, .....C.....C,T.....A..... </pre> |

# KCNQ4 Scaffold with disagreement

|                                    |                                                                                                                                                                                                                                                                                                                                                                                                                                                                                                                                                                                                                                                                                                                                                                                                                                                                                                                                                                                                                                                                                                                                                                                                                    |
|------------------------------------|--------------------------------------------------------------------------------------------------------------------------------------------------------------------------------------------------------------------------------------------------------------------------------------------------------------------------------------------------------------------------------------------------------------------------------------------------------------------------------------------------------------------------------------------------------------------------------------------------------------------------------------------------------------------------------------------------------------------------------------------------------------------------------------------------------------------------------------------------------------------------------------------------------------------------------------------------------------------------------------------------------------------------------------------------------------------------------------------------------------------------------------------------------------------------------------------------------------------|
| <b>Human</b>                       | GCCGCGGGTACCCAGGGCAACATCTTCGCCACGTCCGCGCTGCGCAGCATGCGCTTCTGCAGATCTGCGCATGGTGCATGGACCGCGCGGGCCACCTGGAAGCTGCTGGGCTCAGTGGTCTACGCGCATAGCAAGG                                                                                                                                                                                                                                                                                                                                                                                                                                                                                                                                                                                                                                                                                                                                                                                                                                                                                                                                                                                                                                                                           |
| <b>BEAT</b>                        | GCTGCGGGCACACAGGGCAACATCTTCGCCACGTCTGCGCTGCGCAGCATGCGCTTCTGCAGATCTGCGCATGCTGCGGATGGACCGGAGGGGCGGCACCTGGAAGCTGCTGGGCTCGGTGGTCTACGCGCACAGCAAGG                                                                                                                                                                                                                                                                                                                                                                                                                                                                                                                                                                                                                                                                                                                                                                                                                                                                                                                                                                                                                                                                       |
| <b>Scaffold</b>                    | <div style="display: flex; justify-content: space-between; font-size: small;"> <span>1</span> <span>11</span> <span>21</span> <span>31</span> <span>41</span> <span>51</span> <span>61</span> <span>71</span> <span>81</span> <span>91</span> <span>101</span> <span>111</span> <span>121</span> <span>131</span> <span>141</span> </div> <pre> GCCGCGGGTCCAGGGCAATGCTTTGCCACGTCTGCACTCCGGAGCCTGCGGTTCTGCAGATCTGCGGATGATCCGCATGGACCGGAGGGGAGGCACCTGGAAGCTCCTGGGCTCCGCCATCTGCGCCACAGCAAGGN ..... .....C.....C.....C..G..... .....G.....CA.....C.....C..G..... ..... .....C.....T..T..... .....TGG..A..... .....C.....C.....C..g.....tgg..a..... .....C.....C.....C..g.....TGG..A..... .....a.....G..C..... .....C..C.....C..... .....t.....C.....g..... .....g..tg..g..C..C..... .....a.....a.....a.....a..a..... .....g.....g.....C..... .....A..G..G.....C.....T..A..... .....C..g.....G..... .....C.....C..g..g.....C..... .....C.....C..g..g.....C..... .....g..C.....C..g..g.....C..... .....g..g.....g.....C.....C.....C..... .....C.....C..G..G.....C.....C..... .....g.....C.....C..g..g.....C..g.....TGG..A..... .....C.....C..G..G.....C..... .....C.....C..... .....C.....TGG..A..... ..... ..... </pre> |
| BWA<br>alignment<br>to<br>scaffold |                                                                                                                                                                                                                                                                                                                                                                                                                                                                                                                                                                                                                                                                                                                                                                                                                                                                                                                                                                                                                                                                                                                                                                                                                    |

# OTOF Scaffold with disagreement

|                           |                                                                                                                                                                                                                                                                                                                                                                                                                                                                                                                                                                             |
|---------------------------|-----------------------------------------------------------------------------------------------------------------------------------------------------------------------------------------------------------------------------------------------------------------------------------------------------------------------------------------------------------------------------------------------------------------------------------------------------------------------------------------------------------------------------------------------------------------------------|
| Human                     | GCCGCTTCCTCCCTCGCTGACAAGGACCAGGGCCACTCATCCCGCACCAGGCTTGACCGGGAGCGCCTCAAGTCCTGCATGAGGGAGCTGG                                                                                                                                                                                                                                                                                                                                                                                                                                                                                 |
| BEAT                      | GCCGCTTCCTCCCTCGCTGACAAGGACCAGAGCCACTCGTCCCGCACCAGGCTTGACCGGGAGCGCCTCAAGTCCTGCATGAGGGAGCTGG                                                                                                                                                                                                                                                                                                                                                                                                                                                                                 |
| Scaffold                  | <div style="display: flex; justify-content: space-between; width: 100%;"> <span>1</span> <span>11</span> <span>21</span> <span>31</span> <span>41</span> <span>51</span> <span>61</span> <span>71</span> <span>81</span> <span>91</span> </div> <p>GCCGCTTCCTCCCTCGCGGACAAGGACCAGAGCCACTCGTCCCGCACCAGGCTGGACCGGGAGCGCCTCAAGTCCTGCATGAGGGAGCTGGNNN</p>                                                                                                                                                                                                                       |
| BWA alignment to scaffold | <p>The alignment visualization shows approximately 15 reads aligned to the scaffold. The scaffold sequence is: GCCGCTTCCTCCCTCGCGGACAAGGACCAGAGCCACTCGTCCCGCACCAGGCTGGACCGGGAGCGCCTCAAGTCCTGCATGAGGGAGCTGGNNN. The reads are mostly aligned to the first 91 positions of the scaffold. Mismatches are indicated by 't' (thymine) or 'g' (guanine) characters below the alignment lines. For example, one read has a 't' at position 51, and another has a 'g' at position 61. The alignment also shows some indels and gaps, particularly towards the end of the reads.</p> |
