# Supplementary material for: Testing Convergent Evolution in Auditory Processing Genes between Echolocating Mammals and the Aye-Aye, a Percussive-Foraging Primate
Source: PubMed Central journal article supplement — Genome Biol Evol. 2017 Jul 26;9(7):1978–89. doi: 10.1093/gbe/evx140 (PMC5553384; doi:10.1093/gbe/evx140), 2017-07-26
Supplement: evx140_SuppTable_1.pdf [file evx140_SuppTable_1.pdf]

Bankoff *et al.* Supplemental Table 1

|                    | Species 1: Species 2 & not Species 3 or Consensus <sup>i</sup> | Species 3: Species 2 & not Species 1 or Consensus | P-value | Ratio        | Bonferroni adjusted P-value |
|--------------------|----------------------------------------------------------------|---------------------------------------------------|---------|--------------|-----------------------------|
|                    | Daubentonia.vs.Homo.vs.Propithecus                             | Propithecus.vs.Homo.vs.Daubentonia                | 0.4578  | 0.705882353  | 1                           |
| <b>Covergent:</b>  | 12                                                             | 17                                                |         |              |                             |
| <b>Comparable:</b> | 7756                                                           | 7756                                              |         |              |                             |
|                    | Daubentonia.vs.Pteronotus.vs.Propithecus                       | Propithecus.vs.Pteronotus.vs.Daubentonia          | 0.4543  | 0.6          | 1                           |
| <b>Covergent:</b>  | 6                                                              | 10                                                |         |              |                             |
| <b>Comparable:</b> | 7746                                                           | 7746                                              |         |              |                             |
|                    | Daubentonia.vs.Myotis.vs.Propithecus                           | Propithecus.vs.Myotis.vs.Daubentonia              | 1       | 1            | 1                           |
| <b>Covergent:</b>  | 7                                                              | 7                                                 |         |              |                             |
| <b>Comparable:</b> | 7742                                                           | 7742                                              |         |              |                             |
|                    | Daubentonia.vs.Rhinolophus.vs.Propithecus                      | Propithecus.vs.Rhinolophus.vs.Daubentonia         | 0.6634  | 0.75         | 1                           |
| <b>Covergent:</b>  | 9                                                              | 12                                                |         |              |                             |
| <b>Comparable:</b> | 7580                                                           | 7580                                              |         |              |                             |
|                    | Daubentonia.vs.Megaderma.vs.Propithecus                        | Propithecus.vs.Megaderma.vs.Daubentonia           | 1       | 1            | 1                           |
| <b>Covergent:</b>  | 8                                                              | 8                                                 |         |              |                             |
| <b>Comparable:</b> | 6928                                                           | 6928                                              |         |              |                             |
|                    | Daubentonia.vs.Pteropus.vs.Propithecus                         | Propithecus.vs.Pteropus.vs.Daubentonia            | 0.5077  | 0.5          | 1                           |
| <b>Covergent:</b>  | 3                                                              | 6                                                 |         |              |                             |
| <b>Comparable:</b> | 7679                                                           | 7679                                              |         |              |                             |
|                    | Daubentonia.vs.Eidolon.vs.Propithecus                          | Propithecus.vs.Eidolon.vs.Daubentonia             | 1       | 0.8333333333 | 1                           |
| <b>Covergent:</b>  | 5                                                              | 6                                                 |         |              |                             |
| <b>Comparable:</b> | 7677                                                           | 7677                                              |         |              |                             |
|                    | Daubentonia.vs.Tursiops.vs.Propithecus                         | Propithecus.vs.Tursiops.vs.Daubentonia            | 0.7743  | 1.4          | 1                           |
| <b>Covergent:</b>  | 7                                                              | 5                                                 |         |              |                             |
| <b>Comparable:</b> | 7313                                                           | 7313                                              |         |              |                             |
|                    | Daubentonia.vs.Bos.vs.Propithecus                              | Propithecus.vs.Bos.vs.Daubentonia                 | 0.04892 | 0.307692308  | 0.58704                     |
| <b>Covergent:</b>  | 4                                                              | 13                                                |         |              |                             |
| <b>Comparable:</b> | 7757                                                           | 7757                                              |         |              |                             |

Bankoff *et al.* Supplemental Table 1

|                    | Species 1: Species 2 & not Species 3 or Consensus | Species 3: Species 2 & not Species 1 or Consensus | P-value | Ratio       | Bonferroni adjusted P-value |
|--------------------|---------------------------------------------------|---------------------------------------------------|---------|-------------|-----------------------------|
|                    | Daubentonia.vs.Mus.vs.Propithecus                 | Propithecus.vs.Mus.vs.Daubentonia                 | 1       | 0.875       | 1                           |
| <b>Covergent:</b>  | 7                                                 | 8                                                 |         |             |                             |
| <b>Comparable:</b> | 7756                                              | 7756                                              |         |             |                             |
|                    | Daubentonia.vs.Loxodonta.vs.Propithecus           | Propithecus.vs.Loxodonta.vs.Daubentonia           | 0.8387  | 0.846153846 | 1                           |
| <b>Covergent:</b>  | 11                                                | 13                                                |         |             |                             |
| <b>Comparable:</b> | 6991                                              | 6991                                              |         |             |                             |
|                    | Daubentonia.vs.Oryctolagus.vs.Propithecus         | Propithecus.vs.Oryctolagus.vs.Daubentonia         | 0.6634  | 0.75        | 1                           |
| <b>Covergent:</b>  | 9                                                 | 12                                                |         |             |                             |
| <b>Comparable:</b> | 7534                                              | 7534                                              |         |             |                             |
|                    | Rhinolophus.vs.Daubentonia.vs.Pteropus            | Pteropus.vs.Daubentonia.vs.Rhinolophus            | 0.2629  | 1.857142857 | 1                           |
| <b>Covergent:</b>  | 13                                                | 7                                                 |         |             |                             |
| <b>Comparable:</b> | 8122                                              | 8122                                              |         |             |                             |
|                    | Rhinolophus.vs.Daubentonia.vs.Eidolon             | Eidolon.vs.Daubentonia.vs.Rhinolophus             | 0.541   | 1.4         | 1                           |
| <b>Covergent:</b>  | 14                                                | 10                                                |         |             |                             |
| <b>Comparable:</b> | 8117                                              | 8117                                              |         |             |                             |
|                    | Rhinolophus.vs.Propithecus.vs.Pteropus            | Pteropus.vs.Propithecus.vs.Rhinolophus            | 0.2097  | 1.875       | 1                           |
| <b>Covergent:</b>  | 15                                                | 8                                                 |         |             |                             |
| <b>Comparable:</b> | 7583                                              | 7583                                              |         |             |                             |
|                    | Rhinolophus.vs.Propithecus.vs.Eidolon             | Eidolon.vs.Propithecus.vs.Rhinolophus             | 0.2097  | 1.875       | 1                           |
| <b>Covergent:</b>  | 15                                                | 8                                                 |         |             |                             |
| <b>Comparable:</b> | 7581                                              | 7581                                              |         |             |                             |
|                    | Rhinolophus.vs.Homo.vs.Pteropus                   | Pteropus.vs.Homo.vs.Rhinolophus                   | 0.2474  | 1.7         | 1                           |
| <b>Covergent:</b>  | 17                                                | 10                                                |         |             |                             |
| <b>Comparable:</b> | 8220                                              | 8220                                              |         |             |                             |
|                    | Rhinolophus.vs.Homo.vs.Eidolon                    | Eidolon.vs.Homo.vs.Rhinolophus                    | 0.4727  | 1.384615385 | 1                           |
| <b>Covergent:</b>  | 18                                                | 13                                                |         |             |                             |
| <b>Comparable:</b> | 8215                                              | 8215                                              |         |             |                             |

Bankoff *et al.* Supplemental Table 1

|                    | Species 1: Species 2 & not Species 3 or Consensus | Species 3: Species 2 & not Species 1 or Consensus | P-value  | Ratio       | Bonferroni adjusted P-value |
|--------------------|---------------------------------------------------|---------------------------------------------------|----------|-------------|-----------------------------|
|                    | Rhinolophus.vs.Pteronotus.vs.Pteropus             | Pteropus.vs.Pteronotus.vs.Rhinolophus             | 1.50E-08 | 6.25        | 1.7976E-07                  |
| <b>Covergent:</b>  | 50                                                | 8                                                 |          |             |                             |
| <b>Comparable:</b> | 8212                                              | 8212                                              |          |             |                             |
|                    | Rhinolophus.vs.Pteronotus.vs.Eidolon              | Eidolon.vs.Pteronotus.vs.Rhinolophus              | 7.11E-09 | 7           | 8.5344E-08                  |
| <b>Covergent:</b>  | 49                                                | 7                                                 |          |             |                             |
| <b>Comparable:</b> | 8214                                              | 8214                                              |          |             |                             |
|                    | Rhinolophus.vs.Myotis.vs.Pteropus                 | Pteropus.vs.Myotis.vs.Rhinolophus                 | 2.87E-15 | 10.57142857 | 3.444E-14                   |
| <b>Covergent:</b>  | 74                                                | 7                                                 |          |             |                             |
| <b>Comparable:</b> | 8210                                              | 8210                                              |          |             |                             |
|                    | Rhinolophus.vs.Myotis.vs.Eidolon                  | Eidolon.vs.Myotis.vs.Rhinolophus                  | 4.88E-16 | 12.33333333 | 5.8572E-15                  |
| <b>Covergent:</b>  | 74                                                | 6                                                 |          |             |                             |
| <b>Comparable:</b> | 8202                                              | 8202                                              |          |             |                             |
|                    | Rhinolophus.vs.Megaderma.vs.Pteropus              | Pteropus.vs.Megaderma.vs.Rhinolophus              | 2.20E-16 | 46.2        | 2.64E-15                    |
| <b>Covergent:</b>  | 231                                               | 5                                                 |          |             |                             |
| <b>Comparable:</b> | 7559                                              | 7559                                              |          |             |                             |
|                    | Rhinolophus.vs.Megaderma.vs.Eidolon               | Eidolon.vs.Megaderma.vs.Rhinolophus               | 2.20E-16 | 59          | 2.64E-15                    |
| <b>Covergent:</b>  | 236                                               | 4                                                 |          |             |                             |
| <b>Comparable:</b> | 7554                                              | 7554                                              |          |             |                             |
|                    | Rhinolophus.vs.Pteropus.vs.Eidolon                | Eidolon.vs.Pteropus.vs.Rhinolophus                | 1.59E-12 | 0.072727273 | 1.908E-11                   |
| <b>Covergent:</b>  | 4                                                 | 55                                                |          |             |                             |
| <b>Comparable:</b> | 8151                                              | 8151                                              |          |             |                             |
|                    | Rhinolophus.vs.Eidolon.vs.Pteropus                | Pteropus.vs.Eidolon.vs.Rhinolophus                | 2.20E-16 | 0           | 2.64E-15                    |
| <b>Covergent:</b>  | 0                                                 | 55                                                |          |             |                             |
| <b>Comparable:</b> | 8151                                              | 8151                                              |          |             |                             |
|                    | Rhinolophus.vs.Tursiops.vs.Pteropus               | Pteropus.vs.Tursiops.vs.Rhinolophus               | 2.86E-13 | 8.625       | 3.4368E-12                  |
| <b>Covergent:</b>  | 69                                                | 8                                                 |          |             |                             |
| <b>Comparable:</b> | 7673                                              | 7673                                              |          |             |                             |

Bankoff *et al.* Supplemental Table 1

|                    | Species 1: Species 2 & not Species 3 or Consensus | Species 3: Species 2 & not Species 1 or Consensus | P-value   | Ratio       | Bonferroni adjusted P-value |
|--------------------|---------------------------------------------------|---------------------------------------------------|-----------|-------------|-----------------------------|
|                    | Rhinolophus.vs.Tursiops.vs.Eidolon                | Eidolon.vs.Tursiops.vs.Rhinolophus                | 2.20E-16  | 17.25       | 2.64E-15                    |
| <b>Covergent:</b>  | 69                                                | 4                                                 |           |             |                             |
| <b>Comparable:</b> | 7669                                              | 7669                                              |           |             |                             |
|                    | Rhinolophus.vs.Bos.vs.Pteropus                    | Pteropus.vs.Bos.vs.Rhinolophus                    | 0.8317    | 1.2         | 1                           |
| <b>Covergent:</b>  | 12                                                | 10                                                |           |             |                             |
| <b>Comparable:</b> | 8221                                              | 8221                                              |           |             |                             |
|                    | Rhinolophus.vs.Bos.vs.Eidolon                     | Eidolon.vs.Bos.vs.Rhinolophus                     | 1         | 1.090909091 | 1                           |
| <b>Covergent:</b>  | 12                                                | 11                                                |           |             |                             |
| <b>Comparable:</b> | 8216                                              | 8216                                              |           |             |                             |
|                    | Rhinolophus.vs.Mus.vs.Pteropus                    | Pteropus.vs.Mus.vs.Rhinolophus                    | 4.15E-05  | 4.714285714 | 0.00049764                  |
| <b>Covergent:</b>  | 33                                                | 7                                                 |           |             |                             |
| <b>Comparable:</b> | 8219                                              | 8219                                              |           |             |                             |
|                    | Rhinolophus.vs.Mus.vs.Eidolon                     | Eidolon.vs.Mus.vs.Rhinolophus                     | 5.89E-07  | 8.5         | 7.0656E-06                  |
| <b>Covergent:</b>  | 34                                                | 4                                                 |           |             |                             |
| <b>Comparable:</b> | 8214                                              | 8214                                              |           |             |                             |
|                    | Rhinolophus.vs.Loxodonta.vs.Pteropus              | Pteropus.vs.Loxodonta.vs.Rhinolophus              | 1.27E-05  | 6.2         | 0.0001518                   |
| <b>Covergent:</b>  | 31                                                | 5                                                 |           |             |                             |
| <b>Comparable:</b> | 7549                                              | 7549                                              |           |             |                             |
|                    | Rhinolophus.vs.Loxodonta.vs.Eidolon               | Eidolon.vs.Loxodonta.vs.Rhinolophus               | 0.0001141 | 4.428571429 | 0.0013692                   |
| <b>Covergent:</b>  | 31                                                | 7                                                 |           |             |                             |
| <b>Comparable:</b> | 7523                                              | 7523                                              |           |             |                             |
|                    | Rhinolophus.vs.Oryctolagus.vs.Pteropus            | Pteropus.vs.Oryctolagus.vs.Rhinolophus            | 0.0093    | 3.333333333 | 0.1116                      |
| <b>Covergent:</b>  | 20                                                | 6                                                 |           |             |                             |
| <b>Comparable:</b> | 8003                                              | 8003                                              |           |             |                             |
|                    | Rhinolophus.vs.Oryctolagus.vs.Eidolon             | Eidolon.vs.Oryctolagus.vs.Rhinolophus             | 0.01906   | 2.857142857 | 0.22872                     |
| <b>Covergent:</b>  | 20                                                | 7                                                 |           |             |                             |
| <b>Comparable:</b> | 7995                                              | 7995                                              |           |             |                             |

Bankoff *et al.* Supplemental Table 1

|                    | Species 1: Species 2 & not Species 3 or Consensus | Species 3: Species 2 & not Species 1 or Consensus | P-value  | Ratio       | Bonferroni adjusted P-value |
|--------------------|---------------------------------------------------|---------------------------------------------------|----------|-------------|-----------------------------|
|                    | Megaderma.vs.Daubentonia.vs.Pteropus              | Pteropus.vs.Daubentonia.vs.Megaderma              | 0.332    | 1.833333333 | 1                           |
| <b>Covergent:</b>  | 11                                                | 6                                                 |          |             |                             |
| <b>Comparable:</b> | 7462                                              | 7462                                              |          |             |                             |
|                    | Megaderma.vs.Daubentonia.vs.Eidolon               | Eidolon.vs.Daubentonia.vs.Megaderma               | 0.8317   | 1.2         | 1                           |
| <b>Covergent:</b>  | 12                                                | 10                                                |          |             |                             |
| <b>Comparable:</b> | 7457                                              | 7457                                              |          |             |                             |
|                    | Megaderma.vs.Propithecus.vs.Pteropus              | Pteropus.vs.Propithecus.vs.Megaderma              | 0.8035   | 1.285714286 | 1                           |
| <b>Covergent:</b>  | 9                                                 | 7                                                 |          |             |                             |
| <b>Comparable:</b> | 6931                                              | 6931                                              |          |             |                             |
|                    | Megaderma.vs.Propithecus.vs.Eidolon               | Eidolon.vs.Propithecus.vs.Megaderma               | 1        | 1.125       | 1                           |
| <b>Covergent:</b>  | 9                                                 | 8                                                 |          |             |                             |
| <b>Comparable:</b> | 6929                                              | 6929                                              |          |             |                             |
|                    | Megaderma.vs.Homo.vs.Pteropus                     | Pteropus.vs.Homo.vs.Megaderma                     | 0.2474   | 1.7         | 1                           |
| <b>Covergent:</b>  | 17                                                | 10                                                |          |             |                             |
| <b>Comparable:</b> | 7558                                              | 7558                                              |          |             |                             |
|                    | Megaderma.vs.Homo.vs.Eidolon                      | Eidolon.vs.Homo.vs.Megaderma                      | 0.3611   | 1.5         | 1                           |
| <b>Covergent:</b>  | 18                                                | 12                                                |          |             |                             |
| <b>Comparable:</b> | 7553                                              | 7553                                              |          |             |                             |
|                    | Megaderma.vs.Pteronotus.vs.Pteropus               | Pteropus.vs.Pteronotus.vs.Megaderma               | 3.00E-07 | 6.666666667 | 3.5964E-06                  |
| <b>Covergent:</b>  | 40                                                | 6                                                 |          |             |                             |
| <b>Comparable:</b> | 7551                                              | 7551                                              |          |             |                             |
|                    | Megaderma.vs.Pteronotus.vs.Eidolon                | Eidolon.vs.Pteronotus.vs.Megaderma                | 1.71E-07 | 6.833333333 | 2.0496E-06                  |
| <b>Covergent:</b>  | 41                                                | 6                                                 |          |             |                             |
| <b>Comparable:</b> | 7553                                              | 7553                                              |          |             |                             |
|                    | Megaderma.vs.Myotis.vs.Pteropus                   | Pteropus.vs.Myotis.vs.Megaderma                   | 4.12E-13 | 10.5        | 4.938E-12                   |
| <b>Covergent:</b>  | 63                                                | 6                                                 |          |             |                             |
| <b>Comparable:</b> | 7549                                              | 7549                                              |          |             |                             |

Bankoff *et al.* Supplemental Table 1

|                    | Species 1: Species 2 & not Species 3 or Consensus | Species 3: Species 2 & not Species 1 or Consensus | P-value  | Ratio      | Bonferroni adjusted P-value |
|--------------------|---------------------------------------------------|---------------------------------------------------|----------|------------|-----------------------------|
|                    | Megaderma.vs.Myotis.vs.Eidolon                    | Eidolon.vs.Myotis.vs.Megaderma                    | 1.31E-13 | 12.4       | 1.5672E-12                  |
| <b>Covergent:</b>  | 62                                                | 5                                                 |          |            |                             |
| <b>Comparable:</b> | 7541                                              | 7541                                              |          |            |                             |
|                    | Megaderma.vs.Rhinolophus.vs.Pteropus              | Pteropus.vs.Rhinolophus.vs.Megaderma              | 2.20E-16 | 115.5      | 2.64E-15                    |
| <b>Covergent:</b>  | 231                                               | 2                                                 |          |            |                             |
| <b>Comparable:</b> | 7559                                              | 7559                                              |          |            |                             |
|                    | Megaderma.vs.Rhinolophus.vs.Eidolon               | Eidolon.vs.Rhinolophus.vs.Megaderma               | 2.20E-16 | 236        | 2.64E-15                    |
| <b>Covergent:</b>  | 236                                               | 1                                                 |          |            |                             |
| <b>Comparable:</b> | 7554                                              | 7554                                              |          |            |                             |
|                    | Megaderma.vs.Pteropus.vs.Eidolon                  | Eidolon.vs.Pteropus.vs.Megaderma                  | 3.58E-11 | 0.08       | 4.2996E-10                  |
| <b>Covergent:</b>  | 4                                                 | 50                                                |          |            |                             |
| <b>Comparable:</b> | 7489                                              | 7489                                              |          |            |                             |
|                    | Megaderma.vs.Eidolon.vs.Pteropus                  | Pteropus.vs.Eidolon.vs.Megaderma                  | 1.66E-15 | 0          | 1.9908E-14                  |
| <b>Covergent:</b>  | 0                                                 | 50                                                |          |            |                             |
| <b>Comparable:</b> | 7489                                              | 7489                                              |          |            |                             |
|                    | Megaderma.vs.Tursiops.vs.Pteropus                 | Pteropus.vs.Tursiops.vs.Megaderma                 | 2.95E-10 | 7.125      | 3.5412E-09                  |
| <b>Covergent:</b>  | 57                                                | 8                                                 |          |            |                             |
| <b>Comparable:</b> | 7093                                              | 7093                                              |          |            |                             |
|                    | Megaderma.vs.Tursiops.vs.Eidolon                  | Eidolon.vs.Tursiops.vs.Megaderma                  | 4.49E-13 | 14.25      | 5.3868E-12                  |
| <b>Covergent:</b>  | 57                                                | 4                                                 |          |            |                             |
| <b>Comparable:</b> | 7089                                              | 7089                                              |          |            |                             |
|                    | Megaderma.vs.Bos.vs.Pteropus                      | Pteropus.vs.Bos.vs.Megaderma                      | 0.6474   | 1.375      | 1                           |
| <b>Covergent:</b>  | 11                                                | 8                                                 |          |            |                             |
| <b>Comparable:</b> | 7559                                              | 7559                                              |          |            |                             |
|                    | Megaderma.vs.Bos.vs.Eidolon                       | Eidolon.vs.Bos.vs.Megaderma                       | 0.8237   | 1.22222222 | 1                           |
| <b>Covergent:</b>  | 11                                                | 9                                                 |          |            |                             |
| <b>Comparable:</b> | 7554                                              | 7554                                              |          |            |                             |

Bankoff *et al.* Supplemental Table 1

|                    | Species 1: Species 2 & not Species 3 or Consensus | Species 3: Species 2 & not Species 1 or Consensus | P-value   | Ratio       | Bonferroni adjusted P-value |
|--------------------|---------------------------------------------------|---------------------------------------------------|-----------|-------------|-----------------------------|
|                    | Megaderma.vs.Mus.vs.Pteropus                      | Pteropus.vs.Mus.vs.Megaderma                      | 0.0001149 | 4.833333333 | 0.0013788                   |
| <b>Covergent:</b>  | 29                                                | 6                                                 |           |             |                             |
| <b>Comparable:</b> | 7557                                              | 7557                                              |           |             |                             |
|                    | Megaderma.vs.Mus.vs.Eidolon                       | Eidolon.vs.Mus.vs.Megaderma                       | 1.37E-06  | 10          | 0.00001644                  |
| <b>Covergent:</b>  | 30                                                | 3                                                 |           |             |                             |
| <b>Comparable:</b> | 7552                                              | 7552                                              |           |             |                             |
|                    | Megaderma.vs.Loxodonta.vs.Pteropus                | Pteropus.vs.Loxodonta.vs.Megaderma                | 6.50E-05  | 5.6         | 0.00078012                  |
| <b>Covergent:</b>  | 28                                                | 5                                                 |           |             |                             |
| <b>Comparable:</b> | 6887                                              | 6887                                              |           |             |                             |
|                    | Megaderma.vs.Loxodonta.vs.Eidolon                 | Eidolon.vs.Loxodonta.vs.Megaderma                 | 0.0008101 | 3.857142857 | 0.0097212                   |
| <b>Covergent:</b>  | 27                                                | 7                                                 |           |             |                             |
| <b>Comparable:</b> | 6861                                              | 6861                                              |           |             |                             |
|                    | Megaderma.vs.Oryctolagus.vs.Pteropus              | Pteropus.vs.Oryctolagus.vs.Megaderma              | 0.1151    | 2.333333333 | 1                           |
| <b>Covergent:</b>  | 14                                                | 6                                                 |           |             |                             |
| <b>Comparable:</b> | 7341                                              | 7341                                              |           |             |                             |
|                    | Megaderma.vs.Oryctolagus.vs.Eidolon               | Eidolon.vs.Oryctolagus.vs.Megaderma               | 0.1889    | 2           | 1                           |
| <b>Covergent:</b>  | 14                                                | 7                                                 |           |             |                             |
| <b>Comparable:</b> | 7333                                              | 7333                                              |           |             |                             |
|                    | Tursiops.vs.Daubentonia.vs.Bos                    | Bos.vs.Daubentonia.vs.Tursiops                    | 1         | 1           | 1                           |
| <b>Covergent:</b>  | 11                                                | 11                                                |           |             |                             |
| <b>Comparable:</b> | 7825                                              | 7825                                              |           |             |                             |
|                    | Tursiops.vs.Propithecus.vs.Bos                    | Bos.vs.Propithecus.vs.Tursiops                    | 0.0634    | 0.357142857 | 0.7608                      |
| <b>Covergent:</b>  | 5                                                 | 14                                                |           |             |                             |
| <b>Comparable:</b> | 7377                                              | 7377                                              |           |             |                             |
|                    | Tursiops.vs.Homo.vs.Bos                           | Bos.vs.Homo.vs.Tursiops                           | 1         | 0.916666667 | 1                           |
| <b>Covergent:</b>  | 11                                                | 12                                                |           |             |                             |
| <b>Comparable:</b> | 7921                                              | 7921                                              |           |             |                             |

Bankoff *et al.* Supplemental Table 1

|                    | Species 1: Species 2 & not Species 3 or Consensus | Species 3: Species 2 & not Species 1 or Consensus | P-value  | Ratio       | Bonferroni adjusted P-value |
|--------------------|---------------------------------------------------|---------------------------------------------------|----------|-------------|-----------------------------|
|                    | Tursiops.vs.Pteronotus.vs.Bos                     | Bos.vs.Pteronotus.vs.Tursiops                     | 2.49E-05 | 4.5         | 0.00029844                  |
| <b>Covergent:</b>  | 36                                                | 8                                                 |          |             |                             |
| <b>Comparable:</b> | 7911                                              | 7911                                              |          |             |                             |
|                    | Tursiops.vs.Myotis.vs.Bos                         | Bos.vs.Myotis.vs.Tursiops                         | 3.00E-07 | 6.666666667 | 3.6024E-06                  |
| <b>Covergent:</b>  | 40                                                | 6                                                 |          |             |                             |
| <b>Comparable:</b> | 7907                                              | 7907                                              |          |             |                             |
|                    | Tursiops.vs.Rhinolophus.vs.Bos                    | Bos.vs.Rhinolophus.vs.Tursiops                    | 1.94E-13 | 9.571428571 | 2.3292E-12                  |
| <b>Covergent:</b>  | 67                                                | 7                                                 |          |             |                             |
| <b>Comparable:</b> | 7740                                              | 7740                                              |          |             |                             |
|                    | Tursiops.vs.Megaderma.vs.Bos                      | Bos.vs.Megaderma.vs.Tursiops                      | 9.15E-10 | 6.875       | 1.0984E-08                  |
| <b>Covergent:</b>  | 55                                                | 8                                                 |          |             |                             |
| <b>Comparable:</b> | 7160                                              | 7160                                              |          |             |                             |
|                    | Tursiops.vs.Pteropus.vs.Bos                       | Bos.vs.Pteropus.vs.Tursiops                       | 1        | 1.111111111 | 1                           |
| <b>Covergent:</b>  | 10                                                | 9                                                 |          |             |                             |
| <b>Comparable:</b> | 7841                                              | 7841                                              |          |             |                             |
|                    | Tursiops.vs.Eidolon.vs.Bos                        | Bos.vs.Eidolon.vs.Tursiops                        | 0.3015   | 0.5         | 1                           |
| <b>Covergent:</b>  | 5                                                 | 10                                                |          |             |                             |
| <b>Comparable:</b> | 7837                                              | 7837                                              |          |             |                             |
|                    | Tursiops.vs.Mus.vs.Bos                            | Bos.vs.Mus.vs.Tursiops                            | 1        | 1           | 1                           |
| <b>Covergent:</b>  | 19                                                | 19                                                |          |             |                             |
| <b>Comparable:</b> | 7920                                              | 7920                                              |          |             |                             |
|                    | Tursiops.vs.Loxodonta.vs.Bos                      | Bos.vs.Loxodonta.vs.Tursiops                      | 1        | 0.9375      | 1                           |
| <b>Covergent:</b>  | 15                                                | 16                                                |          |             |                             |
| <b>Comparable:</b> | 7073                                              | 7073                                              |          |             |                             |
|                    | Tursiops.vs.Oryctolagus.vs.Bos                    | Bos.vs.Oryctolagus.vs.Tursiops                    | 0.01994  | 0.391304348 | 0.23928                     |
| <b>Covergent:</b>  | 9                                                 | 23                                                |          |             |                             |
| <b>Comparable:</b> | 7702                                              | 7702                                              |          |             |                             |



Bankoff *et al.* Supplemental Table 1

|                    | Species 1: Species 2 & not Species 3 or Consensus | Species 3: Species 2 & not Species 1 or Consensus | P-value  | Ratio       | Bonferroni adjusted P-value |
|--------------------|---------------------------------------------------|---------------------------------------------------|----------|-------------|-----------------------------|
|                    | Mus.vs.Daubentonia.vs.Oryctolagus                 | Oryctolagus.vs.Daubentonia.vs.Mus                 | 0.1077   | 0.56        | 1                           |
| <b>Covergent:</b>  | 14                                                | 25                                                |          |             |                             |
| <b>Comparable:</b> | 8149                                              | 8149                                              |          |             |                             |
|                    | Mus.vs.Propithecus.vs.Oryctolagus                 | Oryctolagus.vs.Propithecus.vs.Mus                 | 0.03334  | 0.461538462 | 0.40008                     |
| <b>Covergent:</b>  | 12                                                | 26                                                |          |             |                             |
| <b>Comparable:</b> | 7598                                              | 7598                                              |          |             |                             |
|                    | Mus.vs.Homo.vs.Oryctolagus                        | Oryctolagus.vs.Homo.vs.Mus                        | 0.5109   | 0.761904762 | 1                           |
| <b>Covergent:</b>  | 16                                                | 21                                                |          |             |                             |
| <b>Comparable:</b> | 8246                                              | 8246                                              |          |             |                             |
|                    | Mus.vs.Pteronotus.vs.Oryctolagus                  | Oryctolagus.vs.Pteronotus.vs.Mus                  | 0.1846   | 1.8         | 1                           |
| <b>Covergent:</b>  | 18                                                | 10                                                |          |             |                             |
| <b>Comparable:</b> | 8237                                              | 8237                                              |          |             |                             |
|                    | Mus.vs.Myotis.vs.Oryctolagus                      | Oryctolagus.vs.Myotis.vs.Mus                      | 0.04679  | 2.083333333 | 0.56148                     |
| <b>Covergent:</b>  | 25                                                | 12                                                |          |             |                             |
| <b>Comparable:</b> | 8242                                              | 8242                                              |          |             |                             |
|                    | Mus.vs.Rhinolophus.vs.Oryctolagus                 | Oryctolagus.vs.Rhinolophus.vs.Mus                 | 0.03132  | 2.071428571 | 0.37584                     |
| <b>Covergent:</b>  | 29                                                | 14                                                |          |             |                             |
| <b>Comparable:</b> | 8064                                              | 8064                                              |          |             |                             |
|                    | Mus.vs.Megaderma.vs.Oryctolagus                   | Oryctolagus.vs.Megaderma.vs.Mus                   | 0.005044 | 2.8         | 0.060528                    |
| <b>Covergent:</b>  | 28                                                | 10                                                |          |             |                             |
| <b>Comparable:</b> | 7402                                              | 7402                                              |          |             |                             |
|                    | Mus.vs.Pteropus.vs.Oryctolagus                    | Oryctolagus.vs.Pteropus.vs.Mus                    | 0.7904   | 1.333333333 | 1                           |
| <b>Covergent:</b>  | 8                                                 | 6                                                 |          |             |                             |
| <b>Comparable:</b> | 8169                                              | 8169                                              |          |             |                             |
|                    | Mus.vs.Eidolon.vs.Oryctolagus                     | Oryctolagus.vs.Eidolon.vs.Mus                     | 0.7743   | 0.714285714 | 1                           |
| <b>Covergent:</b>  | 5                                                 | 7                                                 |          |             |                             |
| <b>Comparable:</b> | 8161                                              | 8161                                              |          |             |                             |

Bankoff *et al.* Supplemental Table 1

|                    | Species 1: Species 2 & not Species 3 or Consensus | Species 3: Species 2 & not Species 1 or Consensus | P-value | Ratio       | Bonferroni adjusted P-value |
|--------------------|---------------------------------------------------|---------------------------------------------------|---------|-------------|-----------------------------|
|                    | Mus.vs.Tursiops.vs.Oryctolagus                    | Oryctolagus.vs.Tursiops.vs.Mus                    | 0.07982 | 2           | 0.95784                     |
| <b>Covergent:</b>  | 22                                                | 11                                                |         |             |                             |
| <b>Comparable:</b> | 7700                                              | 7700                                              |         |             |                             |
|                    | Mus.vs.Bos.vs.Oryctolagus                         | Oryctolagus.vs.Bos.vs.Mus                         | 0.5109  | 0.761904762 | 1                           |
| <b>Covergent:</b>  | 16                                                | 21                                                |         |             |                             |
| <b>Comparable:</b> | 8247                                              | 8247                                              |         |             |                             |
|                    | Mus.vs.Loxodonta.vs.Oryctolagus                   | Oryctolagus.vs.Loxodonta.vs.Mus                   | 1       | 0.9375      | 1                           |
| <b>Covergent:</b>  | 15                                                | 16                                                |         |             |                             |
| <b>Comparable:</b> | 7390                                              | 7390                                              |         |             |                             |

<sup>i</sup> Because *Megaderma* and *Rhinolophus* are more closely related than other bat species in the alignment, as are *Pteropus* and *Eidolon*, we were unable to compare them using this method and they do not appear in this table.
