# Supplementary material for: Testing Convergent Evolution in Auditory Processing Genes between Echolocating Mammals and the Aye-Aye, a Percussive-Foraging Primate
Source: PubMed Central journal article supplement — Genome Biol Evol. 2017 Jul 26;9(7):1978–89. doi: 10.1093/gbe/evx140 (PMC5553384; doi:10.1093/gbe/evx140), 2017-07-26
Supplement: evx140_SuppTable_2.pdf [file evx140_SuppTable_2.pdf]

# CDH23

|                    | Species 1: Species 2 & not Species 3 or Consensus <sup>i</sup> | Species 3: Species 2 & not Species 1 or Consensus | P-value | Ratio       |
|--------------------|----------------------------------------------------------------|---------------------------------------------------|---------|-------------|
|                    | Daubentonia.vs.Homo.vs.Propithecus                             | Propithecus.vs.Homo.vs.Daubentonia                | 0.7741  | 0.714285714 |
| <b>Convergent:</b> | 5                                                              | 7                                                 |         |             |
| <b>Comparable:</b> | 2544                                                           | 2544                                              |         |             |
|                    | Daubentonia.vs.Pteronotus.vs.Propithecus                       | Propithecus.vs.Pteronotus.vs.Daubentonia          | 1       | 1           |
| <b>Convergent:</b> | 2                                                              | 2                                                 |         |             |
| <b>Comparable:</b> | 2544                                                           | 2544                                              |         |             |
|                    | Daubentonia.vs.Myotis.vs.Propithecus                           | Propithecus.vs.Myotis.vs.Daubentonia              | 1       | 0.5         |
| <b>Convergent:</b> | 1                                                              | 2                                                 |         |             |
| <b>Comparable:</b> | 2544                                                           | 2544                                              |         |             |
|                    | Daubentonia.vs.Rhinolophus.vs.Propithecus                      | Propithecus.vs.Rhinolophus.vs.Daubentonia         | 0.5074  | 0.5         |
| <b>Convergent:</b> | 3                                                              | 6                                                 |         |             |
| <b>Comparable:</b> | 2544                                                           | 2544                                              |         |             |
|                    | Daubentonia.vs.Megaderma.vs.Propithecus                        | Propithecus.vs.Megaderma.vs.Daubentonia           | 0.5074  | 0.5         |
| <b>Convergent:</b> | 3                                                              | 6                                                 |         |             |
| <b>Comparable:</b> | 2544                                                           | 2544                                              |         |             |
|                    | Daubentonia.vs.Pteropus.vs.Propithecus                         | Propithecus.vs.Pteropus.vs.Daubentonia            | 0.3748  | 0.25        |
| <b>Convergent:</b> | 1                                                              | 4                                                 |         |             |
| <b>Comparable:</b> | 2544                                                           | 2544                                              |         |             |
|                    | Daubentonia.vs.Eidolon.vs.Propithecus                          | Propithecus.vs.Eidolon.vs.Daubentonia             | 0.4528  | 0.4         |
| <b>Convergent:</b> | 2                                                              | 5                                                 |         |             |
| <b>Comparable:</b> | 2544                                                           | 2544                                              |         |             |
|                    | Daubentonia.vs.Tursiops.vs.Propithecus                         | Propithecus.vs.Tursiops.vs.Daubentonia            | 0.4528  | 2.5         |
| <b>Convergent:</b> | 5                                                              | 2                                                 |         |             |
| <b>Comparable:</b> | 2345                                                           | 2345                                              |         |             |
|                    | Daubentonia.vs.Bos.vs.Propithecus                              | Propithecus.vs.Bos.vs.Daubentonia                 | 0.1247  | 0.166666667 |
| <b>Convergent:</b> | 1                                                              | 6                                                 |         |             |
| <b>Comparable:</b> | 2544                                                           | 2544                                              |         |             |

|                    | Species 1: Species 2 & not Species 3 or Consensus | Species 3: Species 2 & not Species 1 or Consensus | P-value | Ratio       |
|--------------------|---------------------------------------------------|---------------------------------------------------|---------|-------------|
|                    | Daubentonia.vs.Mus.vs.Propithecus                 | Propithecus.vs.Mus.vs.Daubentonia                 | 0.2887  | 0.333333333 |
| <b>Convergent:</b> | 2                                                 | 6                                                 |         |             |
| <b>Comparable:</b> | 2544                                              | 2544                                              |         |             |
|                    | Daubentonia.vs.Loxodonta.vs.Propithecus           | Propithecus.vs.Loxodonta.vs.Daubentonia           | 1       | 0.833333333 |
| <b>Convergent:</b> | 5                                                 | 6                                                 |         |             |
| <b>Comparable:</b> | 2506                                              | 2506                                              |         |             |
|                    | Daubentonia.vs.Oryctolagus.vs.Propithecus         | Propithecus.vs.Oryctolagus.vs.Daubentonia         | 0.2887  | 0.333333333 |
| <b>Convergent:</b> | 2                                                 | 6                                                 |         |             |
| <b>Comparable:</b> | 2543                                              | 2543                                              |         |             |
|                    | Rhinolophus.vs.Daubentonia.vs.Pteropus            | Pteropus.vs.Daubentonia.vs.Rhinolophus            | 1       | 1.333333333 |
| <b>Convergent:</b> | 4                                                 | 3                                                 |         |             |
| <b>Comparable:</b> | 2972                                              | 2972                                              |         |             |
|                    | Rhinolophus.vs.Daubentonia.vs.Eidolon             | Eidolon.vs.Daubentonia.vs.Rhinolophus             | 1       | 0.8         |
| <b>Convergent:</b> | 4                                                 | 5                                                 |         |             |
| <b>Comparable:</b> | 2972                                              | 2972                                              |         |             |
|                    | Rhinolophus.vs.Propithecus.vs.Pteropus            | Pteropus.vs.Propithecus.vs.Rhinolophus            | 1       | 1.25        |
| <b>Convergent:</b> | 5                                                 | 4                                                 |         |             |
| <b>Comparable:</b> | 2550                                              | 2550                                              |         |             |
|                    | Rhinolophus.vs.Propithecus.vs.Eidolon             | Eidolon.vs.Propithecus.vs.Rhinolophus             | 1       | 1           |
| <b>Convergent:</b> | 5                                                 | 5                                                 |         |             |
| <b>Comparable:</b> | 2550                                              | 2550                                              |         |             |
|                    | Rhinolophus.vs.Homo.vs.Pteropus                   | Pteropus.vs.Homo.vs.Rhinolophus                   | 0.6068  | 1.5         |
| <b>Convergent:</b> | 9                                                 | 6                                                 |         |             |
| <b>Comparable:</b> | 2983                                              | 2983                                              |         |             |
|                    | Rhinolophus.vs.Homo.vs.Eidolon                    | Eidolon.vs.Homo.vs.Rhinolophus                    | 0.8034  | 1.285714286 |
| <b>Convergent:</b> | 9                                                 | 7                                                 |         |             |
| <b>Comparable:</b> | 2983                                              | 2983                                              |         |             |

|                    | Species 1: Species 2 & not Species 3 or<br>Consensus | Species 3: Species 2 & not Species 1 or<br>Consensus | P-value   | Ratio       |
|--------------------|------------------------------------------------------|------------------------------------------------------|-----------|-------------|
|                    | Rhinolophus.vs.Pteronotus.vs.Pteropus                | Pteropus.vs.Pteronotus.vs.Rhinolophus                | 0.004278  | 4.5         |
| <b>Convergent:</b> | 18                                                   | 4                                                    |           |             |
| <b>Comparable:</b> | 2983                                                 | 2983                                                 |           |             |
|                    | Rhinolophus.vs.Pteronotus.vs.Eidolon                 | Eidolon.vs.Pteronotus.vs.Rhinolophus                 | 0.0224    | 3           |
| <b>Convergent:</b> | 18                                                   | 6                                                    |           |             |
| <b>Comparable:</b> | 2983                                                 | 2983                                                 |           |             |
|                    | Rhinolophus.vs.Myotis.vs.Pteropus                    | Pteropus.vs.Myotis.vs.Rhinolophus                    | 0.007103  | 4.25        |
| <b>Convergent:</b> | 17                                                   | 4                                                    |           |             |
| <b>Comparable:</b> | 2983                                                 | 2983                                                 |           |             |
|                    | Rhinolophus.vs.Myotis.vs.Eidolon                     | Eidolon.vs.Myotis.vs.Rhinolophus                     | 0.007103  | 4.25        |
| <b>Convergent:</b> | 17                                                   | 4                                                    |           |             |
| <b>Comparable:</b> | 2983                                                 | 2983                                                 |           |             |
|                    | Rhinolophus.vs.Megaderma.vs.Pteropus                 | Pteropus.vs.Megaderma.vs.Rhinolophus                 | < 2.2e-16 | 121         |
| <b>Convergent:</b> | 121                                                  | 1                                                    |           |             |
| <b>Comparable:</b> | 2983                                                 | 2983                                                 |           |             |
|                    | Rhinolophus.vs.Megaderma.vs.Eidolon                  | Eidolon.vs.Megaderma.vs.Rhinolophus                  | < 2.2e-16 | 122         |
| <b>Convergent:</b> | 122                                                  | 1                                                    |           |             |
| <b>Comparable:</b> | 2983                                                 | 2983                                                 |           |             |
|                    | Rhinolophus.vs.Pteropus.vs.Eidolon                   | Eidolon.vs.Pteropus.vs.Rhinolophus                   | 2.06E-07  | 0.037037037 |
| <b>Convergent:</b> | 1                                                    | 27                                                   |           |             |
| <b>Comparable:</b> | 2983                                                 | 2983                                                 |           |             |
|                    | Rhinolophus.vs.Eidolon.vs.Pteropus                   | Pteropus.vs.Eidolon.vs.Rhinolophus                   | 1.42E-08  | 0           |
| <b>Convergent:</b> | 0                                                    | 27                                                   |           |             |
| <b>Comparable:</b> | 2983                                                 | 2983                                                 |           |             |
|                    | Rhinolophus.vs.Tursiops.vs.Pteropus                  | Pteropus.vs.Tursiops.vs.Rhinolophus                  | 0.0001519 | 7.333333333 |
| <b>Convergent:</b> | 22                                                   | 3                                                    |           |             |
| <b>Comparable:</b> | 2684                                                 | 2684                                                 |           |             |

|                    | Species 1: Species 2 & not Species 3 or<br>Consensus | Species 3: Species 2 & not Species 1 or<br>Consensus | P-value  | Ratio       |
|--------------------|------------------------------------------------------|------------------------------------------------------|----------|-------------|
|                    | Rhinolophus.vs.Tursiops.vs.Eidolon                   | Eidolon.vs.Tursiops.vs.Rhinolophus                   | 3.47E-05 | 11          |
| <b>Convergent:</b> | 22                                                   | 2                                                    |          |             |
| <b>Comparable:</b> | 2684                                                 | 2684                                                 |          |             |
|                    | Rhinolophus.vs.Bos.vs.Pteropus                       | Pteropus.vs.Bos.vs.Rhinolophus                       | 1        | 1.166666667 |
| <b>Convergent:</b> | 7                                                    | 6                                                    |          |             |
| <b>Comparable:</b> | 2983                                                 | 2983                                                 |          |             |
|                    | Rhinolophus.vs.Bos.vs.Eidolon                        | Eidolon.vs.Bos.vs.Rhinolophus                        | 1        | 0.875       |
| <b>Convergent:</b> | 7                                                    | 8                                                    |          |             |
| <b>Comparable:</b> | 2983                                                 | 2983                                                 |          |             |
|                    | Rhinolophus.vs.Mus.vs.Pteropus                       | Pteropus.vs.Mus.vs.Rhinolophus                       | 0.004368 | 5.333333333 |
| <b>Convergent:</b> | 16                                                   | 3                                                    |          |             |
| <b>Comparable:</b> | 2982                                                 | 2982                                                 |          |             |
|                    | Rhinolophus.vs.Mus.vs.Eidolon                        | Eidolon.vs.Mus.vs.Rhinolophus                        | 0.001293 | 8           |
| <b>Convergent:</b> | 16                                                   | 2                                                    |          |             |
| <b>Comparable:</b> | 2982                                                 | 2982                                                 |          |             |
|                    | Rhinolophus.vs.Loxodonta.vs.Pteropus                 | Pteropus.vs.Loxodonta.vs.Rhinolophus                 | 0.002319 | 7.5         |
| <b>Convergent:</b> | 15                                                   | 2                                                    |          |             |
| <b>Comparable:</b> | 2945                                                 | 2945                                                 |          |             |
|                    | Rhinolophus.vs.Loxodonta.vs.Eidolon                  | Eidolon.vs.Loxodonta.vs.Rhinolophus                  | 0.007453 | 5           |
| <b>Convergent:</b> | 15                                                   | 3                                                    |          |             |
| <b>Comparable:</b> | 2945                                                 | 2945                                                 |          |             |
|                    | Rhinolophus.vs.Oryctolagus.vs.Pteropus               | Pteropus.vs.Oryctolagus.vs.Rhinolophus               | 0.2261   | 2.666666667 |
| <b>Convergent:</b> | 8                                                    | 3                                                    |          |             |
| <b>Comparable:</b> | 2982                                                 | 2982                                                 |          |             |
|                    | Rhinolophus.vs.Oryctolagus.vs.Eidolon                | Eidolon.vs.Oryctolagus.vs.Rhinolophus                | 0.2261   | 2.666666667 |
| <b>Convergent:</b> | 8                                                    | 3                                                    |          |             |
| <b>Comparable:</b> | 2982                                                 | 2982                                                 |          |             |

|                    | <b>Species 1: Species 2 &amp; not Species 3 or Consensus</b> | <b>Species 3: Species 2 &amp; not Species 1 or Consensus</b> | <b>P-value</b> | <b>Ratio</b> |
|--------------------|--------------------------------------------------------------|--------------------------------------------------------------|----------------|--------------|
|                    | Megaderma.vs.Daubentonia.vs.Pteropus                         | Pteropus.vs.Daubentonia.vs.Megaderma                         | 0.7264         | 1.666666667  |
| <b>Convergent:</b> | 5                                                            | 3                                                            |                |              |
| <b>Comparable:</b> | 2972                                                         | 2972                                                         |                |              |
|                    | Megaderma.vs.Daubentonia.vs.Eidolon                          | Eidolon.vs.Daubentonia.vs.Megaderma                          | 1              | 1            |
| <b>Convergent:</b> | 5                                                            | 5                                                            |                |              |
| <b>Comparable:</b> | 2972                                                         | 2972                                                         |                |              |
|                    | Megaderma.vs.Propithecus.vs.Pteropus                         | Pteropus.vs.Propithecus.vs.Megaderma                         | 1              | 1.25         |
| <b>Convergent:</b> | 5                                                            | 4                                                            |                |              |
| <b>Comparable:</b> | 2550                                                         | 2550                                                         |                |              |
|                    | Megaderma.vs.Propithecus.vs.Eidolon                          | Eidolon.vs.Propithecus.vs.Megaderma                          | 1              | 1            |
| <b>Convergent:</b> | 5                                                            | 5                                                            |                |              |
| <b>Comparable:</b> | 2550                                                         | 2550                                                         |                |              |
|                    | Megaderma.vs.Homo.vs.Pteropus                                | Pteropus.vs.Homo.vs.Megaderma                                | 0.3316         | 1.833333333  |
| <b>Convergent:</b> | 11                                                           | 6                                                            |                |              |
| <b>Comparable:</b> | 2983                                                         | 2983                                                         |                |              |
|                    | Megaderma.vs.Homo.vs.Eidolon                                 | Eidolon.vs.Homo.vs.Megaderma                                 | 0.48           | 1.571428571  |
| <b>Convergent:</b> | 11                                                           | 7                                                            |                |              |
| <b>Comparable:</b> | 2983                                                         | 2983                                                         |                |              |
|                    | Megaderma.vs.Pteronotus.vs.Pteropus                          | Pteropus.vs.Pteronotus.vs.Megaderma                          | 0.0008905      | 5.25         |
| <b>Convergent:</b> | 21                                                           | 4                                                            |                |              |
| <b>Comparable:</b> | 2983                                                         | 2983                                                         |                |              |
|                    | Megaderma.vs.Pteronotus.vs.Eidolon                           | Eidolon.vs.Pteronotus.vs.Megaderma                           | 0.005821       | 3.5          |
| <b>Convergent:</b> | 21                                                           | 6                                                            |                |              |
| <b>Comparable:</b> | 2983                                                         | 2983                                                         |                |              |
|                    | Megaderma.vs.Myotis.vs.Pteropus                              | Pteropus.vs.Myotis.vs.Megaderma                              | 0.0008905      | 5.25         |
| <b>Convergent:</b> | 21                                                           | 4                                                            |                |              |
| <b>Comparable:</b> | 2983                                                         | 2983                                                         |                |              |

|                    | Species 1: Species 2 & not Species 3 or Consensus | Species 3: Species 2 & not Species 1 or Consensus | P-value   | Ratio       |
|--------------------|---------------------------------------------------|---------------------------------------------------|-----------|-------------|
|                    | Megaderma.vs.Myotis.vs.Eidolon                    | Eidolon.vs.Myotis.vs.Megaderma                    | 0.0008905 | 5.25        |
| <b>Convergent:</b> | 21                                                | 4                                                 |           |             |
| <b>Comparable:</b> | 2983                                              | 2983                                              |           |             |
|                    | Megaderma.vs.Rhinolophus.vs.Pteropus              | Pteropus.vs.Rhinolophus.vs.Megaderma              | < 2.2e-16 | 121         |
| <b>Convergent:</b> | 121                                               | 1                                                 |           |             |
| <b>Comparable:</b> | 2983                                              | 2983                                              |           |             |
|                    | Megaderma.vs.Rhinolophus.vs.Eidolon               | Eidolon.vs.Rhinolophus.vs.Megaderma               | < 2.2e-16 | 122         |
| <b>Convergent:</b> | 122                                               | 1                                                 |           |             |
| <b>Comparable:</b> | 2983                                              | 2983                                              |           |             |
|                    | Megaderma.vs.Pteropus.vs.Eidolon                  | Eidolon.vs.Pteropus.vs.Megaderma                  | 2.06E-07  | 0.037037037 |
| <b>Convergent:</b> | 1                                                 | 27                                                |           |             |
| <b>Comparable:</b> | 2983                                              | 2983                                              |           |             |
|                    | Megaderma.vs.Eidolon.vs.Pteropus                  | Pteropus.vs.Eidolon.vs.Megaderma                  | 1.42E-08  | 0           |
| <b>Convergent:</b> | 0                                                 | 27                                                |           |             |
| <b>Comparable:</b> | 2983                                              | 2983                                              |           |             |
|                    | Megaderma.vs.Tursiops.vs.Pteropus                 | Pteropus.vs.Tursiops.vs.Megaderma                 | 4.42E-06  | 9.333333333 |
| <b>Convergent:</b> | 28                                                | 3                                                 |           |             |
| <b>Comparable:</b> | 2684                                              | 2684                                              |           |             |
|                    | Megaderma.vs.Tursiops.vs.Eidolon                  | Eidolon.vs.Tursiops.vs.Megaderma                  | 8.23E-07  | 14          |
| <b>Convergent:</b> | 28                                                | 2                                                 |           |             |
| <b>Comparable:</b> | 2684                                              | 2684                                              |           |             |
|                    | Megaderma.vs.Bos.vs.Pteropus                      | Pteropus.vs.Bos.vs.Megaderma                      | 0.7742    | 1.4         |
| <b>Convergent:</b> | 7                                                 | 5                                                 |           |             |
| <b>Comparable:</b> | 2983                                              | 2983                                              |           |             |
|                    | Megaderma.vs.Bos.vs.Eidolon                       | Eidolon.vs.Bos.vs.Megaderma                       | 1         | 1           |
| <b>Convergent:</b> | 7                                                 | 7                                                 |           |             |
| <b>Comparable:</b> | 2983                                              | 2983                                              |           |             |

|                    | Species 1: Species 2 & not Species 3 or Consensus | Species 3: Species 2 & not Species 1 or Consensus | P-value  | Ratio       |
|--------------------|---------------------------------------------------|---------------------------------------------------|----------|-------------|
|                    | Megaderma.vs.Mus.vs.Pteropus                      | Pteropus.vs.Mus.vs.Megaderma                      | 0.01261  | 4.666666667 |
| <b>Convergent:</b> | 14                                                | 3                                                 |          |             |
| <b>Comparable:</b> | 2982                                              | 2982                                              |          |             |
|                    | Megaderma.vs.Mus.vs.Eidolon                       | Eidolon.vs.Mus.vs.Megaderma                       | 0.004135 | 7           |
| <b>Convergent:</b> | 14                                                | 2                                                 |          |             |
| <b>Comparable:</b> | 2982                                              | 2982                                              |          |             |
|                    | Megaderma.vs.Loxodonta.vs.Pteropus                | Pteropus.vs.Loxodonta.vs.Megaderma                | 0.002319 | 7.5         |
| <b>Convergent:</b> | 15                                                | 2                                                 |          |             |
| <b>Comparable:</b> | 2945                                              | 2945                                              |          |             |
|                    | Megaderma.vs.Loxodonta.vs.Eidolon                 | Eidolon.vs.Loxodonta.vs.Megaderma                 | 0.007453 | 5           |
| <b>Convergent:</b> | 15                                                | 3                                                 |          |             |
| <b>Comparable:</b> | 2945                                              | 2945                                              |          |             |
|                    | Megaderma.vs.Oryctolagus.vs.Pteropus              | Pteropus.vs.Oryctolagus.vs.Megaderma              | 0.2261   | 2.666666667 |
| <b>Convergent:</b> | 8                                                 | 3                                                 |          |             |
| <b>Comparable:</b> | 2982                                              | 2982                                              |          |             |
|                    | Megaderma.vs.Oryctolagus.vs.Eidolon               | Eidolon.vs.Oryctolagus.vs.Megaderma               | 0.2261   | 2.666666667 |
| <b>Convergent:</b> | 8                                                 | 3                                                 |          |             |
| <b>Comparable:</b> | 2982                                              | 2982                                              |          |             |
|                    | Tursiops.vs.Daubentonia.vs.Bos                    | Bos.vs.Daubentonia.vs.Tursiops                    | 0.5806   | 1.6         |
| <b>Convergent:</b> | 8                                                 | 5                                                 |          |             |
| <b>Comparable:</b> | 2673                                              | 2673                                              |          |             |
|                    | Tursiops.vs.Propithecus.vs.Bos                    | Bos.vs.Propithecus.vs.Tursiops                    | 0.2185   | 0.2         |
| <b>Convergent:</b> | 1                                                 | 5                                                 |          |             |
| <b>Comparable:</b> | 2351                                              | 2351                                              |          |             |
|                    | Tursiops.vs.Homo.vs.Bos                           | Bos.vs.Homo.vs.Tursiops                           | 0.07011  | 0.142857143 |
| <b>Convergent:</b> | 1                                                 | 7                                                 |          |             |
| <b>Comparable:</b> | 2684                                              | 2684                                              |          |             |

|                    | Species 1: Species 2 & not Species 3 or<br>Consensus | Species 3: Species 2 & not Species 1 or<br>Consensus | P-value   | Ratio       |
|--------------------|------------------------------------------------------|------------------------------------------------------|-----------|-------------|
|                    | Tursiops.vs.Pteronotus.vs.Bos                        | Bos.vs.Pteronotus.vs.Tursiops                        | 0.00731   | 6.5         |
| <b>Convergent:</b> | 13                                                   | 2                                                    |           |             |
| <b>Comparable:</b> | 2684                                                 | 2684                                                 |           |             |
|                    | Tursiops.vs.Myotis.vs.Bos                            | Bos.vs.Myotis.vs.Tursiops                            | 0.00731   | 6.5         |
| <b>Convergent:</b> | 13                                                   | 2                                                    |           |             |
| <b>Comparable:</b> | 2684                                                 | 2684                                                 |           |             |
|                    | Tursiops.vs.Rhinolophus.vs.Bos                       | Bos.vs.Rhinolophus.vs.Tursiops                       | 0.00244   | 4.2         |
| <b>Convergent:</b> | 21                                                   | 5                                                    |           |             |
| <b>Comparable:</b> | 2684                                                 | 2684                                                 |           |             |
|                    | Tursiops.vs.Megaderma.vs.Bos                         | Bos.vs.Megaderma.vs.Tursiops                         | 0.0003124 | 4.5         |
| <b>Convergent:</b> | 27                                                   | 6                                                    |           |             |
| <b>Comparable:</b> | 2684                                                 | 2684                                                 |           |             |
|                    | Tursiops.vs.Pteropus.vs.Bos                          | Bos.vs.Pteropus.vs.Tursiops                          | 0.4528    | 0.4         |
| <b>Convergent:</b> | 2                                                    | 5                                                    |           |             |
| <b>Comparable:</b> | 2684                                                 | 2684                                                 |           |             |
|                    | Tursiops.vs.Eidolon.vs.Bos                           | Bos.vs.Eidolon.vs.Tursiops                           | 0.07011   | 0.142857143 |
| <b>Convergent:</b> | 1                                                    | 7                                                    |           |             |
| <b>Comparable:</b> | 2684                                                 | 2684                                                 |           |             |
|                    | Tursiops.vs.Mus.vs.Bos                               | Bos.vs.Mus.vs.Tursiops                               | 0.8235    | 0.818181818 |
| <b>Convergent:</b> | 9                                                    | 11                                                   |           |             |
| <b>Comparable:</b> | 2683                                                 | 2683                                                 |           |             |
|                    | Tursiops.vs.Loxodonta.vs.Bos                         | Bos.vs.Loxodonta.vs.Tursiops                         | 0.2663    | 0.444444444 |
| <b>Convergent:</b> | 4                                                    | 9                                                    |           |             |
| <b>Comparable:</b> | 2646                                                 | 2646                                                 |           |             |
|                    | Tursiops.vs.Oryctolagus.vs.Bos                       | Bos.vs.Oryctolagus.vs.Tursiops                       | 0.03491   | 0.25        |
| <b>Convergent:</b> | 3                                                    | 12                                                   |           |             |
| <b>Comparable:</b> | 2683                                                 | 2683                                                 |           |             |



|                    | Species 1: Species 2 & not Species 3 or Consensus | Species 3: Species 2 & not Species 1 or Consensus | P-value | Ratio       |
|--------------------|---------------------------------------------------|---------------------------------------------------|---------|-------------|
|                    | Mus.vs.Daubentonia.vs.Oryctolagus                 | Oryctolagus.vs.Daubentonia.vs.Mus                 | 0.6471  | 0.727272727 |
| <b>Convergent:</b> | 8                                                 | 11                                                |         |             |
| <b>Comparable:</b> | 2971                                              | 2971                                              |         |             |
|                    | Mus.vs.Propithecus.vs.Oryctolagus                 | Oryctolagus.vs.Propithecus.vs.Mus                 | 0.5026  | 0.666666667 |
| <b>Convergent:</b> | 8                                                 | 12                                                |         |             |
| <b>Comparable:</b> | 2549                                              | 2549                                              |         |             |
|                    | Mus.vs.Homo.vs.Oryctolagus                        | Oryctolagus.vs.Homo.vs.Mus                        | 0.6286  | 1.428571429 |
| <b>Convergent:</b> | 10                                                | 7                                                 |         |             |
| <b>Comparable:</b> | 2981                                              | 2981                                              |         |             |
|                    | Mus.vs.Pteronotus.vs.Oryctolagus                  | Oryctolagus.vs.Pteronotus.vs.Mus                  | 0.4539  | 1.666666667 |
| <b>Convergent:</b> | 10                                                | 6                                                 |         |             |
| <b>Comparable:</b> | 2981                                              | 2981                                              |         |             |
|                    | Mus.vs.Myotis.vs.Oryctolagus                      | Oryctolagus.vs.Myotis.vs.Mus                      | 1       | 1           |
| <b>Convergent:</b> | 7                                                 | 7                                                 |         |             |
| <b>Comparable:</b> | 2981                                              | 2981                                              |         |             |
|                    | Mus.vs.Rhinolophus.vs.Oryctolagus                 | Oryctolagus.vs.Rhinolophus.vs.Mus                 | 0.07784 | 2.5         |
| <b>Convergent:</b> | 15                                                | 6                                                 |         |             |
| <b>Comparable:</b> | 2981                                              | 2981                                              |         |             |
|                    | Mus.vs.Megaderma.vs.Oryctolagus                   | Oryctolagus.vs.Megaderma.vs.Mus                   | 0.1885  | 2           |
| <b>Convergent:</b> | 14                                                | 7                                                 |         |             |
| <b>Comparable:</b> | 2981                                              | 2981                                              |         |             |
|                    | Mus.vs.Pteropus.vs.Oryctolagus                    | Oryctolagus.vs.Pteropus.vs.Mus                    | 1       | 1.333333333 |
| <b>Convergent:</b> | 4                                                 | 3                                                 |         |             |
| <b>Comparable:</b> | 2981                                              | 2981                                              |         |             |
|                    | Mus.vs.Eidolon.vs.Oryctolagus                     | Oryctolagus.vs.Eidolon.vs.Mus                     | 1       | 1           |
| <b>Convergent:</b> | 3                                                 | 3                                                 |         |             |
| <b>Comparable:</b> | 2981                                              | 2981                                              |         |             |

|                    | <b>Species 1: Species 2 &amp; not Species 3 or<br/>Consensus</b> | <b>Species 3: Species 2 &amp; not Species 1 or<br/>Consensus</b> | <b>P-value</b> | <b>Ratio</b> |
|--------------------|------------------------------------------------------------------|------------------------------------------------------------------|----------------|--------------|
|                    | Mus.vs.Tursiops.vs.Oryctolagus                                   | Oryctolagus.vs.Tursiops.vs.Mus                                   | 0.1455         | 3            |
| <b>Convergent:</b> | 9                                                                | 3                                                                |                |              |
| <b>Comparable:</b> | 2682                                                             | 2682                                                             |                |              |
|                    | Mus.vs.Bos.vs.Oryctolagus                                        | Oryctolagus.vs.Bos.vs.Mus                                        | 0.8235         | 0.818181818  |
| <b>Convergent:</b> | 9                                                                | 11                                                               |                |              |
| <b>Comparable:</b> | 2981                                                             | 2981                                                             |                |              |
|                    | Mus.vs.Loxodonta.vs.Oryctolagus                                  | Oryctolagus.vs.Loxodonta.vs.Mus                                  | 0.8142         | 1.25         |
| <b>Convergent:</b> | 10                                                               | 8                                                                |                |              |
| <b>Comparable:</b> | 2943                                                             | 2943                                                             |                |              |

# KCNQ4

|                    | Species 1: Species 2 & not Species 3 or Consensus | Species 3: Species 2 & not Species 1 or Consensus | P-value | Ratio |
|--------------------|---------------------------------------------------|---------------------------------------------------|---------|-------|
|                    | Daubentonia.vs.Homo.vs.Propithecus                | Propithecus.vs.Homo.vs.Daubentonia                | 1       | N/A   |
| <b>Convergent:</b> | 0                                                 | 0                                                 |         |       |
| <b>Comparable:</b> | 518                                               | 518                                               |         |       |
|                    | Daubentonia.vs.Pteronotus.vs.Propithecus          | Propithecus.vs.Pteronotus.vs.Daubentonia          | 1       | N/A   |
| <b>Convergent:</b> | 0                                                 | 0                                                 |         |       |
| <b>Comparable:</b> | 518                                               | 518                                               |         |       |
|                    | Daubentonia.vs.Myotis.vs.Propithecus              | Propithecus.vs.Myotis.vs.Daubentonia              | 1       | N/A   |
| <b>Convergent:</b> | 1                                                 | 0                                                 |         |       |
| <b>Comparable:</b> | 518                                               | 518                                               |         |       |
|                    | Daubentonia.vs.Megaderma.vs.Propithecus           | Propithecus.vs.Megaderma.vs.Daubentonia           | 1       | N/A   |
| <b>Convergent:</b> | 1                                                 | 0                                                 |         |       |
| <b>Comparable:</b> | 483                                               | 483                                               |         |       |
|                    | Daubentonia.vs.Rhinolophus.vs.Propithecus         | Propithecus.vs.Rhinolophus.vs.Daubentonia         | 1       | N/A   |
| <b>Convergent:</b> | 1                                                 | 0                                                 |         |       |
| <b>Comparable:</b> | 518                                               | 518                                               |         |       |
|                    | Daubentonia.vs.Pteropus.vs.Propithecus            | Propithecus.vs.Pteropus.vs.Daubentonia            | 1       | N/A   |
| <b>Convergent:</b> | 0                                                 | 0                                                 |         |       |
| <b>Comparable:</b> | 486                                               | 486                                               |         |       |
|                    | Daubentonia.vs.Eidolon.vs.Propithecus             | Propithecus.vs.Eidolon.vs.Daubentonia             | 1       | N/A   |
| <b>Convergent:</b> | 0                                                 | 0                                                 |         |       |
| <b>Comparable:</b> | 518                                               | 518                                               |         |       |
|                    | Daubentonia.vs.Tursiops.vs.Propithecus            | Propithecus.vs.Tursiops.vs.Daubentonia            | 1       | N/A   |
| <b>Convergent:</b> | 0                                                 | 0                                                 |         |       |
| <b>Comparable:</b> | 475                                               | 475                                               |         |       |
|                    | Daubentonia.vs.Bos.vs.Propithecus                 | Propithecus.vs.Bos.vs.Daubentonia                 | 0.4995  | 0     |
| <b>Convergent:</b> | 0                                                 | 2                                                 |         |       |
| <b>Comparable:</b> | 518                                               | 518                                               |         |       |

|                    | Species 1: Species 2 & not Species 3 or Consensus | Species 3: Species 2 & not Species 1 or Consensus | P-value | Ratio |
|--------------------|---------------------------------------------------|---------------------------------------------------|---------|-------|
|                    | Daubentonia.vs.Mus.vs.Propithecus                 | Propithecus.vs.Mus.vs.Daubentonia                 | 0.4995  | N/A   |
| <b>Convergent:</b> | 2                                                 | 0                                                 |         |       |
| <b>Comparable:</b> | 518                                               | 518                                               |         |       |
|                    | Daubentonia.vs.Oryctolagus.vs.Propithecus         | Propithecus.vs.Oryctolagus.vs.Daubentonia         | 1       | 0     |
| <b>Convergent:</b> | 0                                                 | 1                                                 |         |       |
| <b>Comparable:</b> | 518                                               | 518                                               |         |       |
|                    | Daubentonia.vs.Loxodonta.vs.Propithecus           | Propithecus.vs.Loxodonta.vs.Daubentonia           | 1       | N/A   |
| <b>Convergent:</b> | 0                                                 | 0                                                 |         |       |
| <b>Comparable:</b> | 409                                               | 409                                               |         |       |
|                    | Megaderma.vs.Daubentonia.vs.Pteropus              | Pteropus.vs.Daubentonia.vs.Megaderma              | 1       | N/A   |
| <b>Convergent:</b> | 0                                                 | 0                                                 |         |       |
| <b>Comparable:</b> | 498                                               | 498                                               |         |       |
|                    | Megaderma.vs.Daubentonia.vs.Eidolon               | Eidolon.vs.Daubentonia.vs.Megaderma               | 1       | N/A   |
| <b>Convergent:</b> | 1                                                 | 0                                                 |         |       |
| <b>Comparable:</b> | 535                                               | 535                                               |         |       |
|                    | Megaderma.vs.Propithecus.vs.Pteropus              | Pteropus.vs.Propithecus.vs.Megaderma              | 1       | N/A   |
| <b>Convergent:</b> | 0                                                 | 0                                                 |         |       |
| <b>Comparable:</b> | 451                                               | 451                                               |         |       |
|                    | Megaderma.vs.Propithecus.vs.Eidolon               | Eidolon.vs.Propithecus.vs.Megaderma               | 1       | N/A   |
| <b>Convergent:</b> | 0                                                 | 0                                                 |         |       |
| <b>Comparable:</b> | 483                                               | 483                                               |         |       |
|                    | Megaderma.vs.Homo.vs.Pteropus                     | Pteropus.vs.Homo.vs.Megaderma                     | 1       | N/A   |
| <b>Convergent:</b> | 0                                                 | 0                                                 |         |       |
| <b>Comparable:</b> | 499                                               | 499                                               |         |       |
|                    | Megaderma.vs.Homo.vs.Eidolon                      | Eidolon.vs.Homo.vs.Megaderma                      | 1       | N/A   |
| <b>Convergent:</b> | 0                                                 | 0                                                 |         |       |
| <b>Comparable:</b> | 536                                               | 536                                               |         |       |
|                    | Megaderma.vs.Pteronotus.vs.Pteropus               | Pteropus.vs.Pteronotus.vs.Megaderma               | 1       | N/A   |
| <b>Convergent:</b> | 0                                                 | 0                                                 |         |       |
| <b>Comparable:</b> | 499                                               | 499                                               |         |       |

|                    | Species 1: Species 2 & not Species 3 or<br>Consensus | Species 3: Species 2 & not Species 1 or<br>Consensus | P-value | Ratio |
|--------------------|------------------------------------------------------|------------------------------------------------------|---------|-------|
|                    | Megaderma.vs.Pteronotus.vs.Eidolon                   | Eidolon.vs.Pteronotus.vs.Megaderma                   | 1       | N/A   |
| <b>Convergent:</b> | 0                                                    | 0                                                    |         |       |
| <b>Comparable:</b> | 536                                                  | 536                                                  |         |       |
|                    | Megaderma.vs.Myotis.vs.Pteropus                      | Pteropus.vs.Myotis.vs.Megaderma                      | 1       | N/A   |
| <b>Convergent:</b> | 0                                                    | 0                                                    |         |       |
| <b>Comparable:</b> | 499                                                  | 499                                                  |         |       |
|                    | Megaderma.vs.Myotis.vs.Eidolon                       | Eidolon.vs.Myotis.vs.Megaderma                       | 0.4995  | N/A   |
| <b>Convergent:</b> | 2                                                    | 0                                                    |         |       |
| <b>Comparable:</b> | 536                                                  | 536                                                  |         |       |
|                    | Megaderma.vs.Rhinolophus.vs.Pteropus                 | Pteropus.vs.Rhinolophus.vs.Megaderma                 | 0.2493  | N/A   |
| <b>Convergent:</b> | 3                                                    | 0                                                    |         |       |
| <b>Comparable:</b> | 499                                                  | 499                                                  |         |       |
|                    | Megaderma.vs.Rhinolophus.vs.Eidolon                  | Eidolon.vs.Rhinolophus.vs.Megaderma                  | 0.03083 | N/A   |
| <b>Convergent:</b> | 6                                                    | 0                                                    |         |       |
| <b>Comparable:</b> | 536                                                  | 536                                                  |         |       |
|                    | Megaderma.vs.Pteropus.vs.Eidolon                     | Eidolon.vs.Pteropus.vs.Megaderma                     | 0.4995  | 0     |
| <b>Convergent:</b> | 0                                                    | 2                                                    |         |       |
| <b>Comparable:</b> | 499                                                  | 499                                                  |         |       |
|                    | Megaderma.vs.Eidolon.vs.Pteropus                     | Pteropus.vs.Eidolon.vs.Megaderma                     | 0.4995  | 0     |
| <b>Convergent:</b> | 0                                                    | 2                                                    |         |       |
| <b>Comparable:</b> | 499                                                  | 499                                                  |         |       |
|                    | Megaderma.vs.Tursiops.vs.Pteropus                    | Pteropus.vs.Tursiops.vs.Megaderma                    | 1       | N/A   |
| <b>Convergent:</b> | 1                                                    | 0                                                    |         |       |
| <b>Comparable:</b> | 456                                                  | 456                                                  |         |       |
|                    | Megaderma.vs.Tursiops.vs.Eidolon                     | Eidolon.vs.Tursiops.vs.Megaderma                     | 1       | N/A   |
| <b>Convergent:</b> | 1                                                    | 0                                                    |         |       |
| <b>Comparable:</b> | 493                                                  | 493                                                  |         |       |
|                    | Megaderma.vs.Bos.vs.Pteropus                         | Pteropus.vs.Bos.vs.Megaderma                         | 1       | N/A   |
| <b>Convergent:</b> | 0                                                    | 0                                                    |         |       |
| <b>Comparable:</b> | 499                                                  | 499                                                  |         |       |

|                    | Species 1: Species 2 & not Species 3 or Consensus | Species 3: Species 2 & not Species 1 or Consensus | P-value | Ratio |
|--------------------|---------------------------------------------------|---------------------------------------------------|---------|-------|
|                    | Megaderma.vs.Bos.vs.Eidolon                       | Eidolon.vs.Bos.vs.Megaderma                       | 1       | N/A   |
| <b>Convergent:</b> | 0                                                 | 0                                                 |         |       |
| <b>Comparable:</b> | 536                                               | 536                                               |         |       |
|                    | Megaderma.vs.Mus.vs.Pteropus                      | Pteropus.vs.Mus.vs.Megaderma                      | 1       | N/A   |
| <b>Convergent:</b> | 0                                                 | 0                                                 |         |       |
| <b>Comparable:</b> | 499                                               | 499                                               |         |       |
|                    | Megaderma.vs.Mus.vs.Eidolon                       | Eidolon.vs.Mus.vs.Megaderma                       | 1       | N/A   |
| <b>Convergent:</b> | 1                                                 | 0                                                 |         |       |
| <b>Comparable:</b> | 536                                               | 536                                               |         |       |
|                    | Megaderma.vs.Oryctolagus.vs.Pteropus              | Pteropus.vs.Oryctolagus.vs.Megaderma              | 1       | N/A   |
| <b>Convergent:</b> | 0                                                 | 0                                                 |         |       |
| <b>Comparable:</b> | 499                                               | 499                                               |         |       |
|                    | Megaderma.vs.Oryctolagus.vs.Eidolon               | Eidolon.vs.Oryctolagus.vs.Megaderma               | 1       | N/A   |
| <b>Convergent:</b> | 0                                                 | 0                                                 |         |       |
| <b>Comparable:</b> | 536                                               | 536                                               |         |       |
|                    | Megaderma.vs.Loxodonta.vs.Pteropus                | Pteropus.vs.Loxodonta.vs.Megaderma                | 1       | 0     |
| <b>Convergent:</b> | 0                                                 | 1                                                 |         |       |
| <b>Comparable:</b> | 390                                               | 390                                               |         |       |
|                    | Megaderma.vs.Loxodonta.vs.Eidolon                 | Eidolon.vs.Loxodonta.vs.Megaderma                 | 1       | 0     |
| <b>Convergent:</b> | 0                                                 | 1                                                 |         |       |
| <b>Comparable:</b> | 427                                               | 427                                               |         |       |
|                    | Rhinolophus.vs.Daubentonia.vs.Pteropus            | Pteropus.vs.Daubentonia.vs.Rhinolophus            | 1       | N/A   |
| <b>Convergent:</b> | 0                                                 | 0                                                 |         |       |
| <b>Comparable:</b> | 533                                               | 533                                               |         |       |
|                    | Rhinolophus.vs.Daubentonia.vs.Eidolon             | Eidolon.vs.Daubentonia.vs.Rhinolophus             | 1       | N/A   |
| <b>Convergent:</b> | 1                                                 | 0                                                 |         |       |
| <b>Comparable:</b> | 570                                               | 570                                               |         |       |
|                    | Rhinolophus.vs.Propithecus.vs.Pteropus            | Pteropus.vs.Propithecus.vs.Rhinolophus            | 1       | N/A   |
| <b>Convergent:</b> | 0                                                 | 0                                                 |         |       |
| <b>Comparable:</b> | 486                                               | 486                                               |         |       |

|                    | Species 1: Species 2 & not Species 3 or Consensus | Species 3: Species 2 & not Species 1 or Consensus | P-value | Ratio |
|--------------------|---------------------------------------------------|---------------------------------------------------|---------|-------|
|                    | Rhinolophus.vs.Propithecus.vs.Eidolon             | Eidolon.vs.Propithecus.vs.Rhinolophus             | 1       | N/A   |
| <b>Convergent:</b> | 0                                                 | 0                                                 |         |       |
| <b>Comparable:</b> | 518                                               | 518                                               |         |       |
|                    | Rhinolophus.vs.Homo.vs.Pteropus                   | Pteropus.vs.Homo.vs.Rhinolophus                   | 1       | N/A   |
| <b>Convergent:</b> | 0                                                 | 0                                                 |         |       |
| <b>Comparable:</b> | 534                                               | 534                                               |         |       |
|                    | Rhinolophus.vs.Homo.vs.Eidolon                    | Eidolon.vs.Homo.vs.Rhinolophus                    | 1       | N/A   |
| <b>Convergent:</b> | 0                                                 | 0                                                 |         |       |
| <b>Comparable:</b> | 571                                               | 571                                               |         |       |
|                    | Rhinolophus.vs.Pteronotus.vs.Pteropus             | Pteropus.vs.Pteronotus.vs.Rhinolophus             | 1       | N/A   |
| <b>Convergent:</b> | 0                                                 | 0                                                 |         |       |
| <b>Comparable:</b> | 534                                               | 534                                               |         |       |
|                    | Rhinolophus.vs.Pteronotus.vs.Eidolon              | Eidolon.vs.Pteronotus.vs.Rhinolophus              | 1       | N/A   |
| <b>Convergent:</b> | 0                                                 | 0                                                 |         |       |
| <b>Comparable:</b> | 571                                               | 571                                               |         |       |
|                    | Rhinolophus.vs.Myotis.vs.Pteropus                 | Pteropus.vs.Myotis.vs.Rhinolophus                 | 1       | N/A   |
| <b>Convergent:</b> | 0                                                 | 0                                                 |         |       |
| <b>Comparable:</b> | 534                                               | 534                                               |         |       |
|                    | Rhinolophus.vs.Myotis.vs.Eidolon                  | Eidolon.vs.Myotis.vs.Rhinolophus                  | 0.4996  | N/A   |
| <b>Convergent:</b> | 2                                                 | 0                                                 |         |       |
| <b>Comparable:</b> | 571                                               | 571                                               |         |       |
|                    | Rhinolophus.vs.Megaderma.vs.Pteropus              | Pteropus.vs.Megaderma.vs.Rhinolophus              | 0.2493  | N/A   |
| <b>Convergent:</b> | 3                                                 | 0                                                 |         |       |
| <b>Comparable:</b> | 499                                               | 499                                               |         |       |
|                    | Rhinolophus.vs.Megaderma.vs.Eidolon               | Eidolon.vs.Megaderma.vs.Rhinolophus               | 0.03083 | N/A   |
| <b>Convergent:</b> | 6                                                 | 0                                                 |         |       |
| <b>Comparable:</b> | 536                                               | 536                                               |         |       |
|                    | Rhinolophus.vs.Pteropus.vs.Eidolon                | Eidolon.vs.Pteropus.vs.Rhinolophus                | 0.4995  | 0     |
| <b>Convergent:</b> | 0                                                 | 2                                                 |         |       |
| <b>Comparable:</b> | 534                                               | 534                                               |         |       |

|                    | Species 1: Species 2 & not Species 3 or Consensus | Species 3: Species 2 & not Species 1 or Consensus | P-value | Ratio |
|--------------------|---------------------------------------------------|---------------------------------------------------|---------|-------|
|                    | Rhinolophus.vs.Eidolon.vs.Pteropus                | Pteropus.vs.Eidolon.vs.Rhinolophus                | 0.4995  | 0     |
| <b>Convergent:</b> | 0                                                 | 2                                                 |         |       |
| <b>Comparable:</b> | 534                                               | 534                                               |         |       |
|                    | Rhinolophus.vs.Tursiops.vs.Pteropus               | Pteropus.vs.Tursiops.vs.Rhinolophus               | 1       | N/A   |
| <b>Convergent:</b> | 1                                                 | 0                                                 |         |       |
| <b>Comparable:</b> | 491                                               | 491                                               |         |       |
|                    | Rhinolophus.vs.Tursiops.vs.Eidolon                | Eidolon.vs.Tursiops.vs.Rhinolophus                | 1       | N/A   |
| <b>Convergent:</b> | 1                                                 | 0                                                 |         |       |
| <b>Comparable:</b> | 528                                               | 528                                               |         |       |
|                    | Rhinolophus.vs.Bos.vs.Pteropus                    | Pteropus.vs.Bos.vs.Rhinolophus                    | 1       | N/A   |
| <b>Convergent:</b> | 0                                                 | 0                                                 |         |       |
| <b>Comparable:</b> | 534                                               | 534                                               |         |       |
|                    | Rhinolophus.vs.Bos.vs.Eidolon                     | Eidolon.vs.Bos.vs.Rhinolophus                     | 1       | N/A   |
| <b>Convergent:</b> | 0                                                 | 0                                                 |         |       |
| <b>Comparable:</b> | 571                                               | 571                                               |         |       |
|                    | Rhinolophus.vs.Mus.vs.Pteropus                    | Pteropus.vs.Mus.vs.Rhinolophus                    | 1       | N/A   |
| <b>Convergent:</b> | 0                                                 | 0                                                 |         |       |
| <b>Comparable:</b> | 534                                               | 534                                               |         |       |
|                    | Rhinolophus.vs.Mus.vs.Eidolon                     | Eidolon.vs.Mus.vs.Rhinolophus                     | 1       | N/A   |
| <b>Convergent:</b> | 1                                                 | 0                                                 |         |       |
| <b>Comparable:</b> | 571                                               | 571                                               |         |       |
|                    | Rhinolophus.vs.Oryctolagus.vs.Pteropus            | Pteropus.vs.Oryctolagus.vs.Rhinolophus            | 1       | N/A   |
| <b>Convergent:</b> | 0                                                 | 0                                                 |         |       |
| <b>Comparable:</b> | 534                                               | 534                                               |         |       |
|                    | Rhinolophus.vs.Oryctolagus.vs.Eidolon             | Eidolon.vs.Oryctolagus.vs.Rhinolophus             | 1       | N/A   |
| <b>Convergent:</b> | 0                                                 | 0                                                 |         |       |
| <b>Comparable:</b> | 571                                               | 571                                               |         |       |
|                    | Rhinolophus.vs.Loxodonta.vs.Pteropus              | Pteropus.vs.Loxodonta.vs.Rhinolophus              | 1       | 0     |
| <b>Convergent:</b> | 0                                                 | 1                                                 |         |       |
| <b>Comparable:</b> | 425                                               | 425                                               |         |       |



|                    | Species 1: Species 2 & not Species 3 or Consensus | Species 3: Species 2 & not Species 1 or Consensus | P-value | Ratio |
|--------------------|---------------------------------------------------|---------------------------------------------------|---------|-------|
|                    | Rhinolophus.vs.Loiodonta.vs.Eidolon               | Eidolon.vs.Loiodonta.vs.Rhinolophus               | 1       | 0     |
| <b>Convergent:</b> | 0                                                 | 1                                                 |         |       |
| <b>Comparable:</b> | 462                                               | 462                                               |         |       |
|                    | Tursiops.vs.Daubentonia.vs.Bos                    | Bos.vs.Daubentonia.vs.Tursiops                    | 1       | 0     |
| <b>Convergent:</b> | 0                                                 | 1                                                 |         |       |
| <b>Comparable:</b> | 527                                               | 527                                               |         |       |
|                    | Tursiops.vs.Propithecus.vs.Bos                    | Bos.vs.Propithecus.vs.Tursiops                    | 0.2492  | 0     |
| <b>Convergent:</b> | 0                                                 | 3                                                 |         |       |
| <b>Comparable:</b> | 475                                               | 475                                               |         |       |
|                    | Tursiops.vs.Homo.vs.Bos                           | Bos.vs.Homo.vs.Tursiops                           | 1       | 1     |
| <b>Convergent:</b> | 1                                                 | 1                                                 |         |       |
| <b>Comparable:</b> | 528                                               | 528                                               |         |       |
|                    | Tursiops.vs.Pteronotus.vs.Bos                     | Bos.vs.Pteronotus.vs.Tursiops                     | 1       | N/A   |
| <b>Convergent:</b> | 0                                                 | 0                                                 |         |       |
| <b>Comparable:</b> | 528                                               | 528                                               |         |       |
|                    | Tursiops.vs.Myotis.vs.Bos                         | Bos.vs.Myotis.vs.Tursiops                         | 1       | N/A   |
| <b>Convergent:</b> | 1                                                 | 0                                                 |         |       |
| <b>Comparable:</b> | 528                                               | 528                                               |         |       |
|                    | Tursiops.vs.Megaderma.vs.Bos                      | Bos.vs.Megaderma.vs.Tursiops                      | 1       | N/A   |
| <b>Convergent:</b> | 1                                                 | 0                                                 |         |       |
| <b>Comparable:</b> | 493                                               | 493                                               |         |       |
|                    | Tursiops.vs.Rhinolophus.vs.Bos                    | Bos.vs.Rhinolophus.vs.Tursiops                    | 1       | N/A   |
| <b>Convergent:</b> | 1                                                 | 0                                                 |         |       |
| <b>Comparable:</b> | 528                                               | 528                                               |         |       |
|                    | Tursiops.vs.Pteropus.vs.Bos                       | Bos.vs.Pteropus.vs.Tursiops                       | 1       | N/A   |
| <b>Convergent:</b> | 0                                                 | 0                                                 |         |       |
| <b>Comparable:</b> | 491                                               | 491                                               |         |       |
|                    | Tursiops.vs.Eidolon.vs.Bos                        | Bos.vs.Eidolon.vs.Tursiops                        | 1       | N/A   |
| <b>Convergent:</b> | 0                                                 | 0                                                 |         |       |
| <b>Comparable:</b> | 528                                               | 528                                               |         |       |

|                    | Species 1: Species 2 & not Species 3 or Consensus | Species 3: Species 2 & not Species 1 or Consensus | P-value | Ratio |
|--------------------|---------------------------------------------------|---------------------------------------------------|---------|-------|
|                    | Tursiops.vs.Mus.vs.Bos                            | Bos.vs.Mus.vs.Tursiops                            | 1       | N/A   |
| <b>Convergent:</b> | 0                                                 | 0                                                 |         |       |
| <b>Comparable:</b> | 528                                               | 528                                               |         |       |
|                    | Tursiops.vs.Oryctolagus.vs.Bos                    | Bos.vs.Oryctolagus.vs.Tursiops                    | 1       | 0.5   |
| <b>Convergent:</b> | 1                                                 | 2                                                 |         |       |
| <b>Comparable:</b> | 528                                               | 528                                               |         |       |
|                    | Tursiops.vs.Loiodonta.vs.Bos                      | Bos.vs.Loiodonta.vs.Tursiops                      | 1       | N/A   |
| <b>Convergent:</b> | 1                                                 | 0                                                 |         |       |
| <b>Comparable:</b> | 419                                               | 419                                               |         |       |
|                    | Mus.vs.Daubentonia.vs.Oryctolagus                 | Oryctolagus.vs.Daubentonia.vs.Mus                 | 1       | 2     |
| <b>Convergent:</b> | 2                                                 | 1                                                 |         |       |
| <b>Comparable:</b> | 570                                               | 570                                               |         |       |
|                    | Mus.vs.Propithecus.vs.Oryctolagus                 | Oryctolagus.vs.Propithecus.vs.Mus                 | 0.4995  | 0     |
| <b>Convergent:</b> | 0                                                 | 2                                                 |         |       |
| <b>Comparable:</b> | 518                                               | 518                                               |         |       |
|                    | Mus.vs.Homo.vs.Oryctolagus                        | Oryctolagus.vs.Homo.vs.Mus                        | 0.2493  | 0     |
| <b>Convergent:</b> | 0                                                 | 3                                                 |         |       |
| <b>Comparable:</b> | 571                                               | 571                                               |         |       |
|                    | Mus.vs.Pteronotus.vs.Oryctolagus                  | Oryctolagus.vs.Pteronotus.vs.Mus                  | 1       | N/A   |
| <b>Convergent:</b> | 0                                                 | 0                                                 |         |       |
| <b>Comparable:</b> | 571                                               | 571                                               |         |       |
|                    | Mus.vs.Myotis.vs.Oryctolagus                      | Oryctolagus.vs.Myotis.vs.Mus                      | 1       | 1     |
| <b>Convergent:</b> | 1                                                 | 1                                                 |         |       |
| <b>Comparable:</b> | 571                                               | 571                                               |         |       |
|                    | Mus.vs.Megaderma.vs.Oryctolagus                   | Oryctolagus.vs.Megaderma.vs.Mus                   | 1       | N/A   |
| <b>Convergent:</b> | 1                                                 | 0                                                 |         |       |
| <b>Comparable:</b> | 536                                               | 536                                               |         |       |
|                    | Mus.vs.Rhinolophus.vs.Oryctolagus                 | Oryctolagus.vs.Rhinolophus.vs.Mus                 | 1       | N/A   |
| <b>Convergent:</b> | 1                                                 | 0                                                 |         |       |
| <b>Comparable:</b> | 571                                               | 571                                               |         |       |

|                    | <b>Species 1: Species 2 &amp; not Species 3 or Consensus</b> | <b>Species 3: Species 2 &amp; not Species 1 or Consensus</b> | <b>P-value</b> | <b>Ratio</b> |
|--------------------|--------------------------------------------------------------|--------------------------------------------------------------|----------------|--------------|
|                    | Mus.vs.Pteropus.vs.Oryctolagus                               | Oryctolagus.vs.Pteropus.vs.Mus                               | 1              | N/A          |
| <b>Convergent:</b> | 0                                                            | 0                                                            |                |              |
| <b>Comparable:</b> | 534                                                          | 534                                                          |                |              |
|                    | Mus.vs.Eidolon.vs.Oryctolagus                                | Oryctolagus.vs.Eidolon.vs.Mus                                | 1              | N/A          |
| <b>Convergent:</b> | 0                                                            | 0                                                            |                |              |
| <b>Comparable:</b> | 571                                                          | 571                                                          |                |              |
|                    | Mus.vs.Tursiops.vs.Oryctolagus                               | Oryctolagus.vs.Tursiops.vs.Mus                               | 1              | 1            |
| <b>Convergent:</b> | 1                                                            | 1                                                            |                |              |
| <b>Comparable:</b> | 528                                                          | 528                                                          |                |              |
|                    | Mus.vs.Bos.vs.Oryctolagus                                    | Oryctolagus.vs.Bos.vs.Mus                                    | 1              | 0.5          |
| <b>Convergent:</b> | 1                                                            | 2                                                            |                |              |
| <b>Comparable:</b> | 571                                                          | 571                                                          |                |              |
|                    | Mus.vs.Loiodonta.vs.Oryctolagus                              | Oryctolagus.vs.Loiodonta.vs.Mus                              | 1              | 1            |
| <b>Convergent:</b> | 1                                                            | 1                                                            |                |              |
| <b>Comparable:</b> | 462                                                          | 462                                                          |                |              |

# OTOF

|                    | Species 1: Species 2 & not Species 3 or Consensus | Species 3: Species 2 & not Species 1 or Consensus | P-value | Ratio        |
|--------------------|---------------------------------------------------|---------------------------------------------------|---------|--------------|
|                    | Daubentonia.vs.Homo.vs.Propithecus                | Propithecus.vs.Homo.vs.Daubentonia                | 0.3431  | 0.428571429  |
| <b>Convergent:</b> | 3                                                 | 7                                                 |         |              |
| <b>Comparable:</b> | 1825                                              | 1825                                              |         |              |
|                    | Daubentonia.vs.Pteronotus.vs.Propithecus          | Propithecus.vs.Pteronotus.vs.Daubentonia          | 1       | 2            |
| <b>Convergent:</b> | 2                                                 | 1                                                 |         |              |
| <b>Comparable:</b> | 1825                                              | 1825                                              |         |              |
|                    | Daubentonia.vs.Myotis.vs.Propithecus              | Propithecus.vs.Myotis.vs.Daubentonia              | 0.6248  | 3            |
| <b>Convergent:</b> | 3                                                 | 1                                                 |         |              |
| <b>Comparable:</b> | 1812                                              | 1812                                              |         |              |
|                    | Daubentonia.vs.Megaderma.vs.Propithecus           | Propithecus.vs.Megaderma.vs.Daubentonia           | 0.4999  | N/A          |
| <b>Convergent:</b> | 2                                                 | 0                                                 |         |              |
| <b>Comparable:</b> | 1809                                              | 1809                                              |         |              |
|                    | Daubentonia.vs.Rhinolophus.vs.Propithecus         | Propithecus.vs.Rhinolophus.vs.Daubentonia         | 1       | 1.5          |
| <b>Convergent:</b> | 3                                                 | 2                                                 |         |              |
| <b>Comparable:</b> | 1810                                              | 1810                                              |         |              |
|                    | Daubentonia.vs.Pteropus.vs.Propithecus            | Propithecus.vs.Pteropus.vs.Daubentonia            | 1       | 0.5          |
| <b>Convergent:</b> | 1                                                 | 2                                                 |         |              |
| <b>Comparable:</b> | 1805                                              | 1805                                              |         |              |
|                    | Daubentonia.vs.Eidolon.vs.Propithecus             | Propithecus.vs.Eidolon.vs.Daubentonia             | 1       | 2            |
| <b>Convergent:</b> | 2                                                 | 1                                                 |         |              |
| <b>Comparable:</b> | 1806                                              | 1806                                              |         |              |
|                    | Daubentonia.vs.Tursiops.vs.Propithecus            | Propithecus.vs.Tursiops.vs.Daubentonia            | 1       | 1            |
| <b>Convergent:</b> | 1                                                 | 1                                                 |         |              |
| <b>Comparable:</b> | 1749                                              | 1749                                              |         |              |
|                    | Daubentonia.vs.Bos.vs.Propithecus                 | Propithecus.vs.Bos.vs.Daubentonia                 | 0.6248  | 0.3333333333 |
| <b>Convergent:</b> | 1                                                 | 3                                                 |         |              |
| <b>Comparable:</b> | 1826                                              | 1826                                              |         |              |

|                    | Species 1: Species 2 & not Species 3 or Consensus | Species 3: Species 2 & not Species 1 or Consensus | P-value | Ratio       |
|--------------------|---------------------------------------------------|---------------------------------------------------|---------|-------------|
|                    | Daubentonia.vs.Mus.vs.Propithecus                 | Propithecus.vs.Mus.vs.Daubentonia                 | 1       | 1           |
| <b>Convergent:</b> | 1                                                 | 1                                                 |         |             |
| <b>Comparable:</b> | 1825                                              | 1825                                              |         |             |
|                    | Daubentonia.vs.Oryctolagus.vs.Propithecus         | Propithecus.vs.Oryctolagus.vs.Daubentonia         | 1       | 0.75        |
| <b>Convergent:</b> | 3                                                 | 4                                                 |         |             |
| <b>Comparable:</b> | 1604                                              | 1604                                              |         |             |
|                    | Daubentonia.vs.Loxodonta.vs.Propithecus           | Propithecus.vs.Loxodonta.vs.Daubentonia           | 1       | 0.8         |
| <b>Convergent:</b> | 4                                                 | 5                                                 |         |             |
| <b>Comparable:</b> | 1816                                              | 1816                                              |         |             |
|                    | Megaderma.vs.Daubentonia.vs.Pteropus              | Pteropus.vs.Daubentonia.vs.Megaderma              | 0.3747  | 4           |
| <b>Convergent:</b> | 4                                                 | 1                                                 |         |             |
| <b>Comparable:</b> | 1828                                              | 1828                                              |         |             |
|                    | Megaderma.vs.Daubentonia.vs.Eidolon               | Eidolon.vs.Daubentonia.vs.Megaderma               | 1       | 1.333333333 |
| <b>Convergent:</b> | 4                                                 | 3                                                 |         |             |
| <b>Comparable:</b> | 1828                                              | 1828                                              |         |             |
|                    | Megaderma.vs.Propithecus.vs.Pteropus              | Pteropus.vs.Propithecus.vs.Megaderma              | 1       | 1           |
| <b>Convergent:</b> | 2                                                 | 2                                                 |         |             |
| <b>Comparable:</b> | 1819                                              | 1819                                              |         |             |
|                    | Megaderma.vs.Propithecus.vs.Eidolon               | Eidolon.vs.Propithecus.vs.Megaderma               | 1       | 1           |
| <b>Convergent:</b> | 2                                                 | 2                                                 |         |             |
| <b>Comparable:</b> | 1820                                              | 1820                                              |         |             |
|                    | Megaderma.vs.Homo.vs.Pteropus                     | Pteropus.vs.Homo.vs.Megaderma                     | 0.4527  | 2.5         |
| <b>Convergent:</b> | 5                                                 | 2                                                 |         |             |
| <b>Comparable:</b> | 1846                                              | 1846                                              |         |             |
|                    | Megaderma.vs.Homo.vs.Eidolon                      | Eidolon.vs.Homo.vs.Megaderma                      | 0.7536  | 1.5         |
| <b>Convergent:</b> | 6                                                 | 4                                                 |         |             |
| <b>Comparable:</b> | 1846                                              | 1846                                              |         |             |
|                    | Megaderma.vs.Pteronotus.vs.Pteropus               | Pteropus.vs.Pteronotus.vs.Megaderma               | 0.00193 | N/A         |
| <b>Convergent:</b> | 10                                                | 0                                                 |         |             |
| <b>Comparable:</b> | 1847                                              | 1847                                              |         |             |

|                    | Species 1: Species 2 & not Species 3 or Consensus | Species 3: Species 2 & not Species 1 or Consensus | P-value   | Ratio       |
|--------------------|---------------------------------------------------|---------------------------------------------------|-----------|-------------|
|                    | Megaderma.vs.Pteronotus.vs.Eidolon                | Eidolon.vs.Pteronotus.vs.Megaderma                | 0.0009626 | N/A         |
| <b>Convergent:</b> | 11                                                | 0                                                 |           |             |
| <b>Comparable:</b> | 1847                                              | 1847                                              |           |             |
|                    | Megaderma.vs.Myotis.vs.Pteropus                   | Pteropus.vs.Myotis.vs.Megaderma                   | 2.96E-05  | N/A         |
| <b>Convergent:</b> | 16                                                | 0                                                 |           |             |
| <b>Comparable:</b> | 1837                                              | 1837                                              |           |             |
|                    | Megaderma.vs.Myotis.vs.Eidolon                    | Eidolon.vs.Myotis.vs.Megaderma                    | 2.96E-05  | N/A         |
| <b>Convergent:</b> | 16                                                | 0                                                 |           |             |
| <b>Comparable:</b> | 1834                                              | 1834                                              |           |             |
|                    | Megaderma.vs.Rhinolophus.vs.Pteropus              | Pteropus.vs.Rhinolophus.vs.Megaderma              | 7.55E-07  | 25          |
| <b>Convergent:</b> | 25                                                | 1                                                 |           |             |
| <b>Comparable:</b> | 1847                                              | 1847                                              |           |             |
|                    | Megaderma.vs.Rhinolophus.vs.Eidolon               | Eidolon.vs.Rhinolophus.vs.Megaderma               | 1.38E-08  | N/A         |
| <b>Convergent:</b> | 27                                                | 0                                                 |           |             |
| <b>Comparable:</b> | 1847                                              | 1847                                              |           |             |
|                    | Megaderma.vs.Pteropus.vs.Eidolon                  | Eidolon.vs.Pteropus.vs.Megaderma                  | 0.01254   | 0.214285714 |
| <b>Convergent:</b> | 3                                                 | 14                                                |           |             |
| <b>Comparable:</b> | 1843                                              | 1843                                              |           |             |
|                    | Megaderma.vs.Eidolon.vs.Pteropus                  | Pteropus.vs.Eidolon.vs.Megaderma                  | 0.0001193 | 0           |
| <b>Convergent:</b> | 0                                                 | 14                                                |           |             |
| <b>Comparable:</b> | 1843                                              | 1843                                              |           |             |
|                    | Megaderma.vs.Tursiops.vs.Pteropus                 | Pteropus.vs.Tursiops.vs.Megaderma                 | 0.774     | 1.4         |
| <b>Convergent:</b> | 7                                                 | 5                                                 |           |             |
| <b>Comparable:</b> | 1771                                              | 1771                                              |           |             |
|                    | Megaderma.vs.Tursiops.vs.Eidolon                  | Eidolon.vs.Tursiops.vs.Megaderma                  | 0.1089    | 4           |
| <b>Convergent:</b> | 8                                                 | 2                                                 |           |             |
| <b>Comparable:</b> | 1771                                              | 1771                                              |           |             |
|                    | Megaderma.vs.Bos.vs.Pteropus                      | Pteropus.vs.Bos.vs.Megaderma                      | 1         | 2           |
| <b>Convergent:</b> | 2                                                 | 1                                                 |           |             |
| <b>Comparable:</b> | 1847                                              | 1847                                              |           |             |

|                    | Species 1: Species 2 & not Species 3 or Consensus | Species 3: Species 2 & not Species 1 or Consensus | P-value | Ratio       |
|--------------------|---------------------------------------------------|---------------------------------------------------|---------|-------------|
|                    | Megaderma.vs.Bos.vs.Eidolon                       | Eidolon.vs.Bos.vs.Megaderma                       | 1       | 2           |
| <b>Convergent:</b> | 2                                                 | 1                                                 |         |             |
| <b>Comparable:</b> | 1847                                              | 1847                                              |         |             |
|                    | Megaderma.vs.Mus.vs.Pteropus                      | Pteropus.vs.Mus.vs.Megaderma                      | 0.2498  | N/A         |
| <b>Convergent:</b> | 3                                                 | 0                                                 |         |             |
| <b>Comparable:</b> | 1846                                              | 1846                                              |         |             |
|                    | Megaderma.vs.Mus.vs.Eidolon                       | Eidolon.vs.Mus.vs.Megaderma                       | 0.2498  | N/A         |
| <b>Convergent:</b> | 3                                                 | 0                                                 |         |             |
| <b>Comparable:</b> | 1846                                              | 1846                                              |         |             |
|                    | Megaderma.vs.Oryctolagus.vs.Pteropus              | Pteropus.vs.Oryctolagus.vs.Megaderma              | 1       | 1.5         |
| <b>Convergent:</b> | 3                                                 | 2                                                 |         |             |
| <b>Comparable:</b> | 1630                                              | 1630                                              |         |             |
|                    | Megaderma.vs.Oryctolagus.vs.Eidolon               | Eidolon.vs.Oryctolagus.vs.Megaderma               | 1       | 1           |
| <b>Convergent:</b> | 3                                                 | 3                                                 |         |             |
| <b>Comparable:</b> | 1627                                              | 1627                                              |         |             |
|                    | Megaderma.vs.Loxodonta.vs.Pteropus                | Pteropus.vs.Loxodonta.vs.Megaderma                | 0.4527  | 2.5         |
| <b>Convergent:</b> | 5                                                 | 2                                                 |         |             |
| <b>Comparable:</b> | 1837                                              | 1837                                              |         |             |
|                    | Megaderma.vs.Loxodonta.vs.Eidolon                 | Eidolon.vs.Loxodonta.vs.Megaderma                 | 0.4527  | 2.5         |
| <b>Convergent:</b> | 5                                                 | 2                                                 |         |             |
| <b>Comparable:</b> | 1837                                              | 1837                                              |         |             |
|                    | Rhinolophus.vs.Daubentonia.vs.Pteropus            | Pteropus.vs.Daubentonia.vs.Rhinolophus            | 0.2184  | 5           |
| <b>Convergent:</b> | 5                                                 | 1                                                 |         |             |
| <b>Comparable:</b> | 1829                                              | 1829                                              |         |             |
|                    | Rhinolophus.vs.Daubentonia.vs.Eidolon             | Eidolon.vs.Daubentonia.vs.Rhinolophus             | 0.7263  | 1.666666667 |
| <b>Convergent:</b> | 5                                                 | 3                                                 |         |             |
| <b>Comparable:</b> | 1829                                              | 1829                                              |         |             |
|                    | Rhinolophus.vs.Propithecus.vs.Pteropus            | Pteropus.vs.Propithecus.vs.Rhinolophus            | 0.6872  | 2           |
| <b>Convergent:</b> | 4                                                 | 2                                                 |         |             |
| <b>Comparable:</b> | 1820                                              | 1820                                              |         |             |

|                    | Species 1: Species 2 & not Species 3 or Consensus | Species 3: Species 2 & not Species 1 or Consensus | P-value   | Ratio |
|--------------------|---------------------------------------------------|---------------------------------------------------|-----------|-------|
|                    | Rhinolophus.vs.Propithecus.vs.Eidolon             | Eidolon.vs.Propithecus.vs.Rhinolophus             | 0.6872    | 2     |
| <b>Convergent:</b> | 4                                                 | 2                                                 |           |       |
| <b>Comparable:</b> | 1821                                              | 1821                                              |           |       |
|                    | Rhinolophus.vs.Homo.vs.Pteropus                   | Pteropus.vs.Homo.vs.Rhinolophus                   | 0.6872    | 2     |
| <b>Convergent:</b> | 4                                                 | 2                                                 |           |       |
| <b>Comparable:</b> | 1847                                              | 1847                                              |           |       |
|                    | Rhinolophus.vs.Homo.vs.Eidolon                    | Eidolon.vs.Homo.vs.Rhinolophus                    | 1         | 1.25  |
| <b>Convergent:</b> | 5                                                 | 4                                                 |           |       |
| <b>Comparable:</b> | 1847                                              | 1847                                              |           |       |
|                    | Rhinolophus.vs.Pteronotus.vs.Pteropus             | Pteropus.vs.Pteronotus.vs.Rhinolophus             | 0.02132   | 9     |
| <b>Convergent:</b> | 9                                                 | 1                                                 |           |       |
| <b>Comparable:</b> | 1848                                              | 1848                                              |           |       |
|                    | Rhinolophus.vs.Pteronotus.vs.Eidolon              | Eidolon.vs.Pteronotus.vs.Rhinolophus              | 0.003869  | N/A   |
| <b>Convergent:</b> | 9                                                 | 0                                                 |           |       |
| <b>Comparable:</b> | 1848                                              | 1848                                              |           |       |
|                    | Rhinolophus.vs.Myotis.vs.Pteropus                 | Pteropus.vs.Myotis.vs.Rhinolophus                 | 0.0004799 | N/A   |
| <b>Convergent:</b> | 12                                                | 0                                                 |           |       |
| <b>Comparable:</b> | 1838                                              | 1838                                              |           |       |
|                    | Rhinolophus.vs.Myotis.vs.Eidolon                  | Eidolon.vs.Myotis.vs.Rhinolophus                  | 0.0004799 | N/A   |
| <b>Convergent:</b> | 12                                                | 0                                                 |           |       |
| <b>Comparable:</b> | 1835                                              | 1835                                              |           |       |
|                    | Rhinolophus.vs.Megaderma.vs.Pteropus              | Pteropus.vs.Megaderma.vs.Rhinolophus              | 5.32E-06  | 12.5  |
| <b>Convergent:</b> | 25                                                | 2                                                 |           |       |
| <b>Comparable:</b> | 1847                                              | 1847                                              |           |       |
|                    | Rhinolophus.vs.Megaderma.vs.Eidolon               | Eidolon.vs.Megaderma.vs.Rhinolophus               | 2.01E-07  | 27    |
| <b>Convergent:</b> | 27                                                | 1                                                 |           |       |
| <b>Comparable:</b> | 1847                                              | 1847                                              |           |       |
|                    | Rhinolophus.vs.Pteropus.vs.Eidolon                | Eidolon.vs.Pteropus.vs.Rhinolophus                | 0.007405  | 0.2   |
| <b>Convergent:</b> | 3                                                 | 15                                                |           |       |
| <b>Comparable:</b> | 1844                                              | 1844                                              |           |       |



|                    | Species 1: Species 2 & not Species 3 or Consensus | Species 3: Species 2 & not Species 1 or Consensus | P-value  | Ratio       |
|--------------------|---------------------------------------------------|---------------------------------------------------|----------|-------------|
|                    | Rhinolophus.vs.Eidolon.vs.Pteropus                | Pteropus.vs.Eidolon.vs.Rhinolophus                | 5.94E-05 | 0           |
| <b>Convergent:</b> | 0                                                 | 15                                                |          |             |
| <b>Comparable:</b> | 1844                                              | 1844                                              |          |             |
|                    | Rhinolophus.vs.Tursiops.vs.Pteropus               | Pteropus.vs.Tursiops.vs.Rhinolophus               | 0.3007   | 2           |
| <b>Convergent:</b> | 10                                                | 5                                                 |          |             |
| <b>Comparable:</b> | 1772                                              | 1772                                              |          |             |
|                    | Rhinolophus.vs.Tursiops.vs.Eidolon                | Eidolon.vs.Tursiops.vs.Rhinolophus                | 0.02223  | 5.5         |
| <b>Convergent:</b> | 11                                                | 2                                                 |          |             |
| <b>Comparable:</b> | 1772                                              | 1772                                              |          |             |
|                    | Rhinolophus.vs.Bos.vs.Pteropus                    | Pteropus.vs.Bos.vs.Rhinolophus                    | 1        | 1           |
| <b>Convergent:</b> | 1                                                 | 1                                                 |          |             |
| <b>Comparable:</b> | 1848                                              | 1848                                              |          |             |
|                    | Rhinolophus.vs.Bos.vs.Eidolon                     | Eidolon.vs.Bos.vs.Rhinolophus                     | 1        | 1           |
| <b>Convergent:</b> | 1                                                 | 1                                                 |          |             |
| <b>Comparable:</b> | 1848                                              | 1848                                              |          |             |
|                    | Rhinolophus.vs.Mus.vs.Pteropus                    | Pteropus.vs.Mus.vs.Rhinolophus                    | 0.4999   | N/A         |
| <b>Convergent:</b> | 2                                                 | 0                                                 |          |             |
| <b>Comparable:</b> | 1847                                              | 1847                                              |          |             |
|                    | Rhinolophus.vs.Mus.vs.Eidolon                     | Eidolon.vs.Mus.vs.Rhinolophus                     | 0.4999   | N/A         |
| <b>Convergent:</b> | 2                                                 | 0                                                 |          |             |
| <b>Comparable:</b> | 1847                                              | 1847                                              |          |             |
|                    | Rhinolophus.vs.Oryctolagus.vs.Pteropus            | Pteropus.vs.Oryctolagus.vs.Rhinolophus            | 0.6872   | 2           |
| <b>Convergent:</b> | 4                                                 | 2                                                 |          |             |
| <b>Comparable:</b> | 1631                                              | 1631                                              |          |             |
|                    | Rhinolophus.vs.Oryctolagus.vs.Eidolon             | Eidolon.vs.Oryctolagus.vs.Rhinolophus             | 1        | 1.333333333 |
| <b>Convergent:</b> | 4                                                 | 3                                                 |          |             |
| <b>Comparable:</b> | 1628                                              | 1628                                              |          |             |
|                    | Rhinolophus.vs.Loiodonta.vs.Pteropus              | Pteropus.vs.Loiodonta.vs.Rhinolophus              | 0.2885   | 3           |
| <b>Convergent:</b> | 6                                                 | 2                                                 |          |             |
| <b>Comparable:</b> | 1838                                              | 1838                                              |          |             |

|                    | Species 1: Species 2 & not Species 3 or Consensus | Species 3: Species 2 & not Species 1 or Consensus | P-value   | Ratio       |
|--------------------|---------------------------------------------------|---------------------------------------------------|-----------|-------------|
|                    | Rhinolophus.vs.Loxodonta.vs.Eidolon               | Eidolon.vs.Loxodonta.vs.Rhinolophus               | 0.2885    | 3           |
| <b>Convergent:</b> | 6                                                 | 2                                                 |           |             |
| <b>Comparable:</b> | 1838                                              | 1838                                              |           |             |
|                    | Tursiops.vs.Daubentonia.vs.Bos                    | Bos.vs.Daubentonia.vs.Tursiops                    | 1         | 1           |
| <b>Convergent:</b> | 2                                                 | 2                                                 |           |             |
| <b>Comparable:</b> | 1773                                              | 1773                                              |           |             |
|                    | Tursiops.vs.Propithecus.vs.Bos                    | Bos.vs.Propithecus.vs.Tursiops                    | 1         | 0.5         |
| <b>Convergent:</b> | 1                                                 | 2                                                 |           |             |
| <b>Comparable:</b> | 1763                                              | 1763                                              |           |             |
|                    | Tursiops.vs.Homo.vs.Bos                           | Bos.vs.Homo.vs.Tursiops                           | 0.2885    | 3           |
| <b>Convergent:</b> | 6                                                 | 2                                                 |           |             |
| <b>Comparable:</b> | 1790                                              | 1790                                              |           |             |
|                    | Tursiops.vs.Pteronotus.vs.Bos                     | Bos.vs.Pteronotus.vs.Tursiops                     | 0.1791    | 3.5         |
| <b>Convergent:</b> | 7                                                 | 2                                                 |           |             |
| <b>Comparable:</b> | 1790                                              | 1790                                              |           |             |
|                    | Tursiops.vs.Myotis.vs.Bos                         | Bos.vs.Myotis.vs.Tursiops                         | 0.7263    | 1.666666667 |
| <b>Convergent:</b> | 5                                                 | 3                                                 |           |             |
| <b>Comparable:</b> | 1777                                              | 1777                                              |           |             |
|                    | Tursiops.vs.Megaderma.vs.Bos                      | Bos.vs.Megaderma.vs.Tursiops                      | 0.03883   | 8           |
| <b>Convergent:</b> | 8                                                 | 1                                                 |           |             |
| <b>Comparable:</b> | 1776                                              | 1776                                              |           |             |
|                    | Tursiops.vs.Rhinolophus.vs.Bos                    | Bos.vs.Rhinolophus.vs.Tursiops                    | 0.0009621 | N/A         |
| <b>Convergent:</b> | 11                                                | 0                                                 |           |             |
| <b>Comparable:</b> | 1777                                              | 1777                                              |           |             |
|                    | Tursiops.vs.Pteropus.vs.Bos                       | Bos.vs.Pteropus.vs.Tursiops                       | 0.07001   | 7           |
| <b>Convergent:</b> | 7                                                 | 1                                                 |           |             |
| <b>Comparable:</b> | 1772                                              | 1772                                              |           |             |
|                    | Tursiops.vs.Eidolon.vs.Bos                        | Bos.vs.Eidolon.vs.Tursiops                        | 0.6248    | 3           |
| <b>Convergent:</b> | 3                                                 | 1                                                 |           |             |
| <b>Comparable:</b> | 1772                                              | 1772                                              |           |             |

|                    | Species 1: Species 2 & not Species 3 or Consensus | Species 3: Species 2 & not Species 1 or Consensus | P-value | Ratio      |
|--------------------|---------------------------------------------------|---------------------------------------------------|---------|------------|
|                    | Tursiops.vs.Mus.vs.Bos                            | Bos.vs.Mus.vs.Tursiops                            | 0.7263  | 0.6        |
| <b>Convergent:</b> | 3                                                 | 5                                                 |         |            |
| <b>Comparable:</b> | 1790                                              | 1790                                              |         |            |
|                    | Tursiops.vs.Oryctolagus.vs.Bos                    | Bos.vs.Oryctolagus.vs.Tursiops                    | 0.5072  | 0.5        |
| <b>Convergent:</b> | 3                                                 | 6                                                 |         |            |
| <b>Comparable:</b> | 1572                                              | 1572                                              |         |            |
|                    | Tursiops.vs.Loiodonta.vs.Bos                      | Bos.vs.Loiodonta.vs.Tursiops                      | 1       | 0.8        |
| <b>Convergent:</b> | 4                                                 | 5                                                 |         |            |
| <b>Comparable:</b> | 1781                                              | 1781                                              |         |            |
|                    | Mus.vs.Daubentonia.vs.Oryctolagus                 | Oryctolagus.vs.Daubentonia.vs.Mus                 | 0.06499 | 0.22222222 |
| <b>Convergent:</b> | 2                                                 | 9                                                 |         |            |
| <b>Comparable:</b> | 1627                                              | 1627                                              |         |            |
|                    | Mus.vs.Propithecus.vs.Oryctolagus                 | Oryctolagus.vs.Propithecus.vs.Mus                 | 0.0213  | 0.11111111 |
| <b>Convergent:</b> | 1                                                 | 9                                                 |         |            |
| <b>Comparable:</b> | 1618                                              | 1618                                              |         |            |
|                    | Mus.vs.Homo.vs.Oryctolagus                        | Oryctolagus.vs.Homo.vs.Mus                        | 0.2258  | 0.375      |
| <b>Convergent:</b> | 3                                                 | 8                                                 |         |            |
| <b>Comparable:</b> | 1645                                              | 1645                                              |         |            |
|                    | Mus.vs.Pteronotus.vs.Oryctolagus                  | Oryctolagus.vs.Pteronotus.vs.Mus                  | 1       | 1          |
| <b>Convergent:</b> | 1                                                 | 1                                                 |         |            |
| <b>Comparable:</b> | 1646                                              | 1646                                              |         |            |
|                    | Mus.vs.Myotis.vs.Oryctolagus                      | Oryctolagus.vs.Myotis.vs.Mus                      | 0.6248  | 0.33333333 |
| <b>Convergent:</b> | 1                                                 | 3                                                 |         |            |
| <b>Comparable:</b> | 1642                                              | 1642                                              |         |            |
|                    | Mus.vs.Megaderma.vs.Oryctolagus                   | Oryctolagus.vs.Megaderma.vs.Mus                   | 1       | 1          |
| <b>Convergent:</b> | 2                                                 | 2                                                 |         |            |
| <b>Comparable:</b> | 1630                                              | 1630                                              |         |            |
|                    | Mus.vs.Rhinolophus.vs.Oryctolagus                 | Oryctolagus.vs.Rhinolophus.vs.Mus                 | 0.6248  | 0.33333333 |
| <b>Convergent:</b> | 1                                                 | 3                                                 |         |            |
| <b>Comparable:</b> | 1631                                              | 1631                                              |         |            |

|                    | <b>Species 1: Species 2 &amp; not Species 3 or Consensus</b> | <b>Species 3: Species 2 &amp; not Species 1 or Consensus</b> | <b>P-value</b> | <b>Ratio</b> |
|--------------------|--------------------------------------------------------------|--------------------------------------------------------------|----------------|--------------|
|                    | Mus.vs.Pteropus.vs.Oryctolagus                               | Oryctolagus.vs.Pteropus.vs.Mus                               | 0.4998         | 0            |
| <b>Convergent:</b> | 0                                                            | 2                                                            |                |              |
| <b>Comparable:</b> | 1630                                                         | 1630                                                         |                |              |
|                    | Mus.vs.Eidolon.vs.Oryctolagus                                | Oryctolagus.vs.Eidolon.vs.Mus                                | 0.2498         | 0            |
| <b>Convergent:</b> | 0                                                            | 3                                                            |                |              |
| <b>Comparable:</b> | 1627                                                         | 1627                                                         |                |              |
|                    | Mus.vs.Tursiops.vs.Oryctolagus                               | Oryctolagus.vs.Tursiops.vs.Mus                               | 1              | 0.75         |
| <b>Convergent:</b> | 3                                                            | 4                                                            |                |              |
| <b>Comparable:</b> | 1571                                                         | 1571                                                         |                |              |
|                    | Mus.vs.Bos.vs.Oryctolagus                                    | Oryctolagus.vs.Bos.vs.Mus                                    | 0.4526         | 0.4          |
| <b>Convergent:</b> | 2                                                            | 5                                                            |                |              |
| <b>Comparable:</b> | 1646                                                         | 1646                                                         |                |              |
|                    | Mus.vs.Loxodonta.vs.Oryctolagus                              | Oryctolagus.vs.Loxodonta.vs.Mus                              | 0.3746         | 0.25         |
| <b>Convergent:</b> | 1                                                            | 4                                                            |                |              |
| <b>Comparable:</b> | 1643                                                         | 1643                                                         |                |              |

# PCDH15

|                    | Species 1: Species 2 & not Species 3 or Consensus | Species 3: Species 2 & not Species 1 or Consensus | P-value | Ratio       |
|--------------------|---------------------------------------------------|---------------------------------------------------|---------|-------------|
|                    | Daubentonia.vs.Homo.vs.Propithecus                | Propithecus.vs.Homo.vs.Daubentonia                | 1       | 0.666666667 |
| <b>Convergent:</b> | 2                                                 | 3                                                 |         |             |
| <b>Comparable:</b> | 1348                                              | 1348                                              |         |             |
|                    | Daubentonia.vs.Pteronotus.vs.Propithecus          | Propithecus.vs.Pteronotus.vs.Daubentonia          | 0.3745  | 0.25        |
| <b>Convergent:</b> | 1                                                 | 4                                                 |         |             |
| <b>Comparable:</b> | 1347                                              | 1347                                              |         |             |
|                    | Daubentonia.vs.Myotis.vs.Propithecus              | Propithecus.vs.Myotis.vs.Daubentonia              | 1       | 1           |
| <b>Convergent:</b> | 1                                                 | 1                                                 |         |             |
| <b>Comparable:</b> | 1347                                              | 1347                                              |         |             |
|                    | Daubentonia.vs.Megaderma.vs.Propithecus           | Propithecus.vs.Megaderma.vs.Daubentonia           | 1       | 1           |
| <b>Convergent:</b> | 1                                                 | 1                                                 |         |             |
| <b>Comparable:</b> | 732                                               | 732                                               |         |             |
|                    | Daubentonia.vs.Rhinolophus.vs.Propithecus         | Propithecus.vs.Rhinolophus.vs.Daubentonia         | 1       | 0.5         |
| <b>Convergent:</b> | 1                                                 | 2                                                 |         |             |
| <b>Comparable:</b> | 1348                                              | 1348                                              |         |             |
|                    | Daubentonia.vs.Pteropus.vs.Propithecus            | Propithecus.vs.Pteropus.vs.Daubentonia            | 1       | N/A         |
| <b>Convergent:</b> | 0                                                 | 0                                                 |         |             |
| <b>Comparable:</b> | 1348                                              | 1348                                              |         |             |
|                    | Daubentonia.vs.Eidolon.vs.Propithecus             | Propithecus.vs.Eidolon.vs.Daubentonia             | 1       | N/A         |
| <b>Convergent:</b> | 0                                                 | 0                                                 |         |             |
| <b>Comparable:</b> | 1348                                              | 1348                                              |         |             |
|                    | Daubentonia.vs.Tursiops.vs.Propithecus            | Propithecus.vs.Tursiops.vs.Daubentonia            | 1       | 0           |
| <b>Convergent:</b> | 0                                                 | 1                                                 |         |             |
| <b>Comparable:</b> | 1237                                              | 1237                                              |         |             |
|                    | Daubentonia.vs.Bos.vs.Propithecus                 | Propithecus.vs.Bos.vs.Daubentonia                 | 0.4998  | 0           |
| <b>Convergent:</b> | 0                                                 | 2                                                 |         |             |
| <b>Comparable:</b> | 1348                                              | 1348                                              |         |             |

|                    | Species 1: Species 2 & not Species 3 or Consensus | Species 3: Species 2 & not Species 1 or Consensus | P-value | Ratio |
|--------------------|---------------------------------------------------|---------------------------------------------------|---------|-------|
|                    | Daubentonia.vs.Mus.vs.Propithecus                 | Propithecus.vs.Mus.vs.Daubentonia                 | 1       | N/A   |
| <b>Convergent:</b> | 0                                                 | 0                                                 |         |       |
| <b>Comparable:</b> | 1348                                              | 1348                                              |         |       |
|                    | Daubentonia.vs.Oryctolagus.vs.Propithecus         | Propithecus.vs.Oryctolagus.vs.Daubentonia         | 1       | 0     |
| <b>Convergent:</b> | 0                                                 | 1                                                 |         |       |
| <b>Comparable:</b> | 1348                                              | 1348                                              |         |       |
|                    | Daubentonia.vs.Loiodonta.vs.Propithecus           | Propithecus.vs.Loiodonta.vs.Daubentonia           | 1       | 1     |
| <b>Convergent:</b> | 1                                                 | 1                                                 |         |       |
| <b>Comparable:</b> | 1348                                              | 1348                                              |         |       |
|                    | Megaderma.vs.Daubentonia.vs.Pteropus              | Pteropus.vs.Daubentonia.vs.Megaderma              | 1       | 1     |
| <b>Convergent:</b> | 1                                                 | 1                                                 |         |       |
| <b>Comparable:</b> | 768                                               | 768                                               |         |       |
|                    | Megaderma.vs.Daubentonia.vs.Eidolon               | Eidolon.vs.Daubentonia.vs.Megaderma               | 1       | 1     |
| <b>Convergent:</b> | 1                                                 | 1                                                 |         |       |
| <b>Comparable:</b> | 768                                               | 768                                               |         |       |
|                    | Megaderma.vs.Propithecus.vs.Pteropus              | Pteropus.vs.Propithecus.vs.Megaderma              | 1       | 1     |
| <b>Convergent:</b> | 1                                                 | 1                                                 |         |       |
| <b>Comparable:</b> | 732                                               | 732                                               |         |       |
|                    | Megaderma.vs.Propithecus.vs.Eidolon               | Eidolon.vs.Propithecus.vs.Megaderma               | 1       | 1     |
| <b>Convergent:</b> | 1                                                 | 1                                                 |         |       |
| <b>Comparable:</b> | 732                                               | 732                                               |         |       |
|                    | Megaderma.vs.Homo.vs.Pteropus                     | Pteropus.vs.Homo.vs.Megaderma                     | 1       | 1     |
| <b>Convergent:</b> | 1                                                 | 1                                                 |         |       |
| <b>Comparable:</b> | 770                                               | 770                                               |         |       |
|                    | Megaderma.vs.Homo.vs.Eidolon                      | Eidolon.vs.Homo.vs.Megaderma                      | 1       | 1     |
| <b>Convergent:</b> | 1                                                 | 1                                                 |         |       |
| <b>Comparable:</b> | 770                                               | 770                                               |         |       |
|                    | Megaderma.vs.Pteronotus.vs.Pteropus               | Pteropus.vs.Pteronotus.vs.Megaderma               | 0.4997  | N/A   |
| <b>Convergent:</b> | 2                                                 | 0                                                 |         |       |
| <b>Comparable:</b> | 770                                               | 770                                               |         |       |

|                    | Species 1: Species 2 & not Species 3 or Consensus | Species 3: Species 2 & not Species 1 or Consensus | P-value   | Ratio |
|--------------------|---------------------------------------------------|---------------------------------------------------|-----------|-------|
|                    | Megaderma.vs.Pteronotus.vs.Eidolon                | Eidolon.vs.Pteronotus.vs.Megaderma                | 0.4997    | N/A   |
| <b>Convergent:</b> | 2                                                 | 0                                                 |           |       |
| <b>Comparable:</b> | 770                                               | 770                                               |           |       |
|                    | Megaderma.vs.Myotis.vs.Pteropus                   | Pteropus.vs.Myotis.vs.Megaderma                   | 0.000945  | N/A   |
| <b>Convergent:</b> | 11                                                | 0                                                 |           |       |
| <b>Comparable:</b> | 770                                               | 770                                               |           |       |
|                    | Megaderma.vs.Myotis.vs.Eidolon                    | Eidolon.vs.Myotis.vs.Megaderma                    | 0.000945  | N/A   |
| <b>Convergent:</b> | 11                                                | 0                                                 |           |       |
| <b>Comparable:</b> | 770                                               | 770                                               |           |       |
|                    | Megaderma.vs.Rhinolophus.vs.Pteropus              | Pteropus.vs.Rhinolophus.vs.Megaderma              | 6.71E-12  | N/A   |
| <b>Convergent:</b> | 38                                                | 0                                                 |           |       |
| <b>Comparable:</b> | 770                                               | 770                                               |           |       |
|                    | Megaderma.vs.Rhinolophus.vs.Eidolon               | Eidolon.vs.Rhinolophus.vs.Megaderma               | 6.71E-12  | N/A   |
| <b>Convergent:</b> | 38                                                | 0                                                 |           |       |
| <b>Comparable:</b> | 770                                               | 770                                               |           |       |
|                    | Megaderma.vs.Pteropus.vs.Eidolon                  | Eidolon.vs.Pteropus.vs.Megaderma                  | 0.2495    | 0     |
| <b>Convergent:</b> | 0                                                 | 3                                                 |           |       |
| <b>Comparable:</b> | 770                                               | 770                                               |           |       |
|                    | Megaderma.vs.Eidolon.vs.Pteropus                  | Pteropus.vs.Eidolon.vs.Megaderma                  | 0.2495    | 0     |
| <b>Convergent:</b> | 0                                                 | 3                                                 |           |       |
| <b>Comparable:</b> | 770                                               | 770                                               |           |       |
|                    | Megaderma.vs.Tursiops.vs.Pteropus                 | Pteropus.vs.Tursiops.vs.Megaderma                 | 0.0009437 | N/A   |
| <b>Convergent:</b> | 11                                                | 0                                                 |           |       |
| <b>Comparable:</b> | 737                                               | 737                                               |           |       |
|                    | Megaderma.vs.Tursiops.vs.Eidolon                  | Eidolon.vs.Tursiops.vs.Megaderma                  | 0.0009437 | N/A   |
| <b>Convergent:</b> | 11                                                | 0                                                 |           |       |
| <b>Comparable:</b> | 737                                               | 737                                               |           |       |
|                    | Megaderma.vs.Bos.vs.Pteropus                      | Pteropus.vs.Bos.vs.Megaderma                      | 1         | 0     |
| <b>Convergent:</b> | 0                                                 | 1                                                 |           |       |
| <b>Comparable:</b> | 770                                               | 770                                               |           |       |

|                    | <b>Species 1: Species 2 &amp; not Species 3 or Consensus</b> | <b>Species 3: Species 2 &amp; not Species 1 or Consensus</b> | <b>P-value</b> | <b>Ratio</b> |
|--------------------|--------------------------------------------------------------|--------------------------------------------------------------|----------------|--------------|
|                    | Megaderma.vs.Bos.vs.Eidolon                                  | Eidolon.vs.Bos.vs.Megaderma                                  | 1              | 0            |
| <b>Convergent:</b> | 0                                                            | 1                                                            |                |              |
| <b>Comparable:</b> | 770                                                          | 770                                                          |                |              |
|                    | Megaderma.vs.Mus.vs.Pteropus                                 | Pteropus.vs.Mus.vs.Megaderma                                 | 0.03095        | N/A          |
| <b>Convergent:</b> | 6                                                            | 0                                                            |                |              |
| <b>Comparable:</b> | 770                                                          | 770                                                          |                |              |
|                    | Megaderma.vs.Mus.vs.Eidolon                                  | Eidolon.vs.Mus.vs.Megaderma                                  | 0.03095        | N/A          |
| <b>Convergent:</b> | 6                                                            | 0                                                            |                |              |
| <b>Comparable:</b> | 770                                                          | 770                                                          |                |              |
|                    | Megaderma.vs.Oryctolagus.vs.Pteropus                         | Pteropus.vs.Oryctolagus.vs.Megaderma                         | 1              | N/A          |
| <b>Convergent:</b> | 1                                                            | 0                                                            |                |              |
| <b>Comparable:</b> | 770                                                          | 770                                                          |                |              |
|                    | Megaderma.vs.Oryctolagus.vs.Eidolon                          | Eidolon.vs.Oryctolagus.vs.Megaderma                          | 1              | N/A          |
| <b>Convergent:</b> | 1                                                            | 0                                                            |                |              |
| <b>Comparable:</b> | 770                                                          | 770                                                          |                |              |
|                    | Megaderma.vs.Loxodonta.vs.Pteropus                           | Pteropus.vs.Loxodonta.vs.Megaderma                           | 0.03095        | N/A          |
| <b>Convergent:</b> | 6                                                            | 0                                                            |                |              |
| <b>Comparable:</b> | 770                                                          | 770                                                          |                |              |
|                    | Megaderma.vs.Loxodonta.vs.Eidolon                            | Eidolon.vs.Loxodonta.vs.Megaderma                            | 0.1242         | 6            |
| <b>Convergent:</b> | 6                                                            | 1                                                            |                |              |
| <b>Comparable:</b> | 770                                                          | 770                                                          |                |              |
|                    | Rhinolophus.vs.Daubentonia.vs.Pteropus                       | Pteropus.vs.Daubentonia.vs.Rhinolophus                       | 1              | 1            |
| <b>Convergent:</b> | 2                                                            | 2                                                            |                |              |
| <b>Comparable:</b> | 1392                                                         | 1392                                                         |                |              |
|                    | Rhinolophus.vs.Daubentonia.vs.Eidolon                        | Eidolon.vs.Daubentonia.vs.Rhinolophus                        | 1              | 2            |
| <b>Convergent:</b> | 2                                                            | 1                                                            |                |              |
| <b>Comparable:</b> | 1392                                                         | 1392                                                         |                |              |
|                    | Rhinolophus.vs.Propithecus.vs.Pteropus                       | Pteropus.vs.Propithecus.vs.Rhinolophus                       | 1              | 1.5          |
| <b>Convergent:</b> | 3                                                            | 2                                                            |                |              |
| <b>Comparable:</b> | 1348                                                         | 1348                                                         |                |              |



|                    | <b>Species 1: Species 2 &amp; not Species 3 or Consensus</b> | <b>Species 3: Species 2 &amp; not Species 1 or Consensus</b> | <b>P-value</b> | <b>Ratio</b> |
|--------------------|--------------------------------------------------------------|--------------------------------------------------------------|----------------|--------------|
|                    | Rhinolophus.vs.Propithecus.vs.Eidolon                        | Eidolon.vs.Propithecus.vs.Rhinolophus                        | 0.6247         | 3            |
| <b>Convergent:</b> | 3                                                            | 1                                                            |                |              |
| <b>Comparable:</b> | 1348                                                         | 1348                                                         |                |              |
|                    | Rhinolophus.vs.Homo.vs.Pteropus                              | Pteropus.vs.Homo.vs.Rhinolophus                              | 0.6247         | 3            |
| <b>Convergent:</b> | 3                                                            | 1                                                            |                |              |
| <b>Comparable:</b> | 1396                                                         | 1396                                                         |                |              |
|                    | Rhinolophus.vs.Homo.vs.Eidolon                               | Eidolon.vs.Homo.vs.Rhinolophus                               | 1              | 1.5          |
| <b>Convergent:</b> | 3                                                            | 2                                                            |                |              |
| <b>Comparable:</b> | 1396                                                         | 1396                                                         |                |              |
|                    | Rhinolophus.vs.Pteronotus.vs.Pteropus                        | Pteropus.vs.Pteronotus.vs.Rhinolophus                        | 0.0005032      | 15           |
| <b>Convergent:</b> | 15                                                           | 1                                                            |                |              |
| <b>Comparable:</b> | 1395                                                         | 1395                                                         |                |              |
|                    | Rhinolophus.vs.Pteronotus.vs.Eidolon                         | Eidolon.vs.Pteronotus.vs.Rhinolophus                         | 0.0005032      | 15           |
| <b>Convergent:</b> | 15                                                           | 1                                                            |                |              |
| <b>Comparable:</b> | 1395                                                         | 1395                                                         |                |              |
|                    | Rhinolophus.vs.Myotis.vs.Pteropus                            | Pteropus.vs.Myotis.vs.Rhinolophus                            | 1.38E-08       | 31           |
| <b>Convergent:</b> | 31                                                           | 1                                                            |                |              |
| <b>Comparable:</b> | 1395                                                         | 1395                                                         |                |              |
|                    | Rhinolophus.vs.Myotis.vs.Eidolon                             | Eidolon.vs.Myotis.vs.Rhinolophus                             | 1.38E-08       | 31           |
| <b>Convergent:</b> | 31                                                           | 1                                                            |                |              |
| <b>Comparable:</b> | 1395                                                         | 1395                                                         |                |              |
|                    | Rhinolophus.vs.Megaderma.vs.Pteropus                         | Pteropus.vs.Megaderma.vs.Rhinolophus                         | 1.33E-10       | 38           |
| <b>Convergent:</b> | 38                                                           | 1                                                            |                |              |
| <b>Comparable:</b> | 770                                                          | 770                                                          |                |              |
|                    | Rhinolophus.vs.Megaderma.vs.Eidolon                          | Eidolon.vs.Megaderma.vs.Rhinolophus                          | 1.33E-10       | 38           |
| <b>Convergent:</b> | 38                                                           | 1                                                            |                |              |
| <b>Comparable:</b> | 770                                                          | 770                                                          |                |              |
|                    | Rhinolophus.vs.Pteropus.vs.Eidolon                           | Eidolon.vs.Pteropus.vs.Rhinolophus                           | 0.03108        | 0            |
| <b>Convergent:</b> | 0                                                            | 6                                                            |                |              |
| <b>Comparable:</b> | 1396                                                         | 1396                                                         |                |              |

|                    | <b>Species 1: Species 2 &amp; not Species 3 or Consensus</b> | <b>Species 3: Species 2 &amp; not Species 1 or Consensus</b> | <b>P-value</b> | <b>Ratio</b> |
|--------------------|--------------------------------------------------------------|--------------------------------------------------------------|----------------|--------------|
|                    | Rhinolophus.vs.Eidolon.vs.Pteropus                           | Pteropus.vs.Eidolon.vs.Rhinolophus                           | 0.03108        | 0            |
| <b>Convergent:</b> | 0                                                            | 6                                                            |                |              |
| <b>Comparable:</b> | 1396                                                         | 1396                                                         |                |              |
|                    | Rhinolophus.vs.Tursiops.vs.Pteropus                          | Pteropus.vs.Tursiops.vs.Rhinolophus                          | 2.20E-07       | N/A          |
| <b>Convergent:</b> | 23                                                           | 0                                                            |                |              |
| <b>Comparable:</b> | 1281                                                         | 1281                                                         |                |              |
|                    | Rhinolophus.vs.Tursiops.vs.Eidolon                           | Eidolon.vs.Tursiops.vs.Rhinolophus                           | 2.20E-07       | N/A          |
| <b>Convergent:</b> | 23                                                           | 0                                                            |                |              |
| <b>Comparable:</b> | 1281                                                         | 1281                                                         |                |              |
|                    | Rhinolophus.vs.Bos.vs.Pteropus                               | Pteropus.vs.Bos.vs.Rhinolophus                               | 1              | 1            |
| <b>Convergent:</b> | 1                                                            | 1                                                            |                |              |
| <b>Comparable:</b> | 1396                                                         | 1396                                                         |                |              |
|                    | Rhinolophus.vs.Bos.vs.Eidolon                                | Eidolon.vs.Bos.vs.Rhinolophus                                | 1              | 1            |
| <b>Convergent:</b> | 1                                                            | 1                                                            |                |              |
| <b>Comparable:</b> | 1396                                                         | 1396                                                         |                |              |
|                    | Rhinolophus.vs.Mus.vs.Pteropus                               | Pteropus.vs.Mus.vs.Rhinolophus                               | 0.01157        | 10           |
| <b>Convergent:</b> | 10                                                           | 1                                                            |                |              |
| <b>Comparable:</b> | 1396                                                         | 1396                                                         |                |              |
|                    | Rhinolophus.vs.Mus.vs.Eidolon                                | Eidolon.vs.Mus.vs.Rhinolophus                                | 0.01157        | 10           |
| <b>Convergent:</b> | 10                                                           | 1                                                            |                |              |
| <b>Comparable:</b> | 1396                                                         | 1396                                                         |                |              |
|                    | Rhinolophus.vs.Oryctolagus.vs.Pteropus                       | Pteropus.vs.Oryctolagus.vs.Rhinolophus                       | 0.2497         | N/A          |
| <b>Convergent:</b> | 3                                                            | 0                                                            |                |              |
| <b>Comparable:</b> | 1396                                                         | 1396                                                         |                |              |
|                    | Rhinolophus.vs.Oryctolagus.vs.Eidolon                        | Eidolon.vs.Oryctolagus.vs.Rhinolophus                        | 0.2497         | N/A          |
| <b>Convergent:</b> | 3                                                            | 0                                                            |                |              |
| <b>Comparable:</b> | 1396                                                         | 1396                                                         |                |              |
|                    | Rhinolophus.vs.Loxodonta.vs.Pteropus                         | Pteropus.vs.Loxodonta.vs.Rhinolophus                         | 0.003858       | N/A          |
| <b>Convergent:</b> | 9                                                            | 0                                                            |                |              |
| <b>Comparable:</b> | 1396                                                         | 1396                                                         |                |              |

|                    | <b>Species 1: Species 2 &amp; not Species 3 or Consensus</b> | <b>Species 3: Species 2 &amp; not Species 1 or Consensus</b> | <b>P-value</b> | <b>Ratio</b> |
|--------------------|--------------------------------------------------------------|--------------------------------------------------------------|----------------|--------------|
|                    | Rhinolophus.vs.Loiodonta.vs.Eidolon                          | Eidolon.vs.Loiodonta.vs.Rhinolophus                          | 0.02127        | 9            |
| <b>Convergent:</b> | 9                                                            | 1                                                            |                |              |
| <b>Comparable:</b> | 1396                                                         | 1396                                                         |                |              |
|                    | Tursiops.vs.Daubentonia.vs.Bos                               | Bos.vs.Daubentonia.vs.Tursiops                               | 1              | N/A          |
| <b>Convergent:</b> | 0                                                            | 0                                                            |                |              |
| <b>Comparable:</b> | 1278                                                         | 1278                                                         |                |              |
|                    | Tursiops.vs.Propithecus.vs.Bos                               | Bos.vs.Propithecus.vs.Tursiops                               | 1              | 0.5          |
| <b>Convergent:</b> | 1                                                            | 2                                                            |                |              |
| <b>Comparable:</b> | 1237                                                         | 1237                                                         |                |              |
|                    | Tursiops.vs.Homo.vs.Bos                                      | Bos.vs.Homo.vs.Tursiops                                      | 0.4998         | N/A          |
| <b>Convergent:</b> | 2                                                            | 0                                                            |                |              |
| <b>Comparable:</b> | 1281                                                         | 1281                                                         |                |              |
|                    | Tursiops.vs.Pteronotus.vs.Bos                                | Bos.vs.Pteronotus.vs.Tursiops                                | 0.2256         | 2.666666667  |
| <b>Convergent:</b> | 8                                                            | 3                                                            |                |              |
| <b>Comparable:</b> | 1280                                                         | 1280                                                         |                |              |
|                    | Tursiops.vs.Myotis.vs.Bos                                    | Bos.vs.Myotis.vs.Tursiops                                    | 0.00624        | 11           |
| <b>Convergent:</b> | 11                                                           | 1                                                            |                |              |
| <b>Comparable:</b> | 1280                                                         | 1280                                                         |                |              |
|                    | Tursiops.vs.Megaderma.vs.Bos                                 | Bos.vs.Megaderma.vs.Tursiops                                 | 0.0009437      | N/A          |
| <b>Convergent:</b> | 11                                                           | 0                                                            |                |              |
| <b>Comparable:</b> | 737                                                          | 737                                                          |                |              |
|                    | Tursiops.vs.Rhinolophus.vs.Bos                               | Bos.vs.Rhinolophus.vs.Tursiops                               | 9.75E-06       | 12           |
| <b>Convergent:</b> | 24                                                           | 2                                                            |                |              |
| <b>Comparable:</b> | 1281                                                         | 1281                                                         |                |              |
|                    | Tursiops.vs.Pteropus.vs.Bos                                  | Bos.vs.Pteropus.vs.Tursiops                                  | 1              | 1            |
| <b>Convergent:</b> | 1                                                            | 1                                                            |                |              |
| <b>Comparable:</b> | 1281                                                         | 1281                                                         |                |              |
|                    | Tursiops.vs.Eidolon.vs.Bos                                   | Bos.vs.Eidolon.vs.Tursiops                                   | 1              | 1            |
| <b>Convergent:</b> | 1                                                            | 1                                                            |                |              |
| <b>Comparable:</b> | 1281                                                         | 1281                                                         |                |              |

|                    | Species 1: Species 2 & not Species 3 or Consensus | Species 3: Species 2 & not Species 1 or Consensus | P-value  | Ratio |
|--------------------|---------------------------------------------------|---------------------------------------------------|----------|-------|
|                    | Tursiops.vs.Mus.vs.Bos                            | Bos.vs.Mus.vs.Tursiops                            | 0.4998   | N/A   |
| <b>Convergent:</b> | 2                                                 | 0                                                 |          |       |
| <b>Comparable:</b> | 1281                                              | 1281                                              |          |       |
|                    | Tursiops.vs.Oryctolagus.vs.Bos                    | Bos.vs.Oryctolagus.vs.Tursiops                    | 1        | N/A   |
| <b>Convergent:</b> | 1                                                 | 0                                                 |          |       |
| <b>Comparable:</b> | 1281                                              | 1281                                              |          |       |
|                    | Tursiops.vs.Loxodonta.vs.Bos                      | Bos.vs.Loxodonta.vs.Tursiops                      | 0.1247   | N/A   |
| <b>Convergent:</b> | 4                                                 | 0                                                 |          |       |
| <b>Comparable:</b> | 1281                                              | 1281                                              |          |       |
|                    | Mus.vs.Daubentonia.vs.Oryctolagus                 | Oryctolagus.vs.Daubentonia.vs.Mus                 | 1        | N/A   |
| <b>Convergent:</b> | 1                                                 | 0                                                 |          |       |
| <b>Comparable:</b> | 1392                                              | 1392                                              |          |       |
|                    | Mus.vs.Propithecus.vs.Oryctolagus                 | Oryctolagus.vs.Propithecus.vs.Mus                 | 1        | 1     |
| <b>Convergent:</b> | 1                                                 | 1                                                 |          |       |
| <b>Comparable:</b> | 1348                                              | 1348                                              |          |       |
|                    | Mus.vs.Homo.vs.Oryctolagus                        | Oryctolagus.vs.Homo.vs.Mus                        | 1        | 1     |
| <b>Convergent:</b> | 1                                                 | 1                                                 |          |       |
| <b>Comparable:</b> | 1396                                              | 1396                                              |          |       |
|                    | Mus.vs.Pteronotus.vs.Oryctolagus                  | Oryctolagus.vs.Pteronotus.vs.Mus                  | 0.6247   | 3     |
| <b>Convergent:</b> | 3                                                 | 1                                                 |          |       |
| <b>Comparable:</b> | 1395                                              | 1395                                              |          |       |
|                    | Mus.vs.Myotis.vs.Oryctolagus                      | Oryctolagus.vs.Myotis.vs.Mus                      | 0.003858 | N/A   |
| <b>Convergent:</b> | 9                                                 | 0                                                 |          |       |
| <b>Comparable:</b> | 1395                                              | 1395                                              |          |       |
|                    | Mus.vs.Megaderma.vs.Oryctolagus                   | Oryctolagus.vs.Megaderma.vs.Mus                   | 0.06962  | 7     |
| <b>Convergent:</b> | 7                                                 | 1                                                 |          |       |
| <b>Comparable:</b> | 770                                               | 770                                               |          |       |
|                    | Mus.vs.Rhinolophus.vs.Oryctolagus                 | Oryctolagus.vs.Rhinolophus.vs.Mus                 | 0.06492  | 4.5   |
| <b>Convergent:</b> | 9                                                 | 2                                                 |          |       |
| <b>Comparable:</b> | 1396                                              | 1396                                              |          |       |

|                    | <b>Species 1: Species 2 &amp; not Species 3 or Consensus</b> | <b>Species 3: Species 2 &amp; not Species 1 or Consensus</b> | <b>P-value</b> | <b>Ratio</b> |
|--------------------|--------------------------------------------------------------|--------------------------------------------------------------|----------------|--------------|
|                    | Mus.vs.Pteropus.vs.Oryctolagus                               | Oryctolagus.vs.Pteropus.vs.Mus                               | 1              | N/A          |
| <b>Convergent:</b> | 1                                                            | 0                                                            |                |              |
| <b>Comparable:</b> | 1396                                                         | 1396                                                         |                |              |
|                    | Mus.vs.Eidolon.vs.Oryctolagus                                | Oryctolagus.vs.Eidolon.vs.Mus                                | 1              | N/A          |
| <b>Convergent:</b> | 1                                                            | 0                                                            |                |              |
| <b>Comparable:</b> | 1396                                                         | 1396                                                         |                |              |
|                    | Mus.vs.Tursiops.vs.Oryctolagus                               | Oryctolagus.vs.Tursiops.vs.Mus                               | 0.6247         | 3            |
| <b>Convergent:</b> | 3                                                            | 1                                                            |                |              |
| <b>Comparable:</b> | 1281                                                         | 1281                                                         |                |              |
|                    | Mus.vs.Bos.vs.Oryctolagus                                    | Oryctolagus.vs.Bos.vs.Mus                                    | 1              | N/A          |
| <b>Convergent:</b> | 1                                                            | 0                                                            |                |              |
| <b>Comparable:</b> | 1396                                                         | 1396                                                         |                |              |
|                    | Mus.vs.Loiodonta.vs.Oryctolagus                              | Oryctolagus.vs.Loiodonta.vs.Mus                              | 1              | 1            |
| <b>Convergent:</b> | 1                                                            | 1                                                            |                |              |
| <b>Comparable:</b> | 1396                                                         | 1396                                                         |                |              |

# PJVK

|                    | Species 1: Species 2 & not Species 3 or Consensus | Species 3: Species 2 & not Species 1 or Consensus | P-value | Ratio |
|--------------------|---------------------------------------------------|---------------------------------------------------|---------|-------|
|                    | Daubentonia.vs.Homo.vs.Propithecus                | Propithecus.vs.Homo.vs.Daubentonia                | 1       | N/A   |
| <b>Convergent:</b> | 0                                                 | 0                                                 |         |       |
| <b>Comparable:</b> | 263                                               | 263                                               |         |       |
|                    | Daubentonia.vs.Pteronotus.vs.Propithecus          | Propithecus.vs.Pteronotus.vs.Daubentonia          | 0.4991  | 0     |
| <b>Convergent:</b> | 0                                                 | 2                                                 |         |       |
| <b>Comparable:</b> | 263                                               | 263                                               |         |       |
|                    | Daubentonia.vs.Myotis.vs.Propithecus              | Propithecus.vs.Myotis.vs.Daubentonia              | 1       | 0     |
| <b>Convergent:</b> | 0                                                 | 1                                                 |         |       |
| <b>Comparable:</b> | 263                                               | 263                                               |         |       |
|                    | Daubentonia.vs.Megaderma.vs.Propithecus           | Propithecus.vs.Megaderma.vs.Daubentonia           | 1       | N/A   |
| <b>Convergent:</b> | 0                                                 | 0                                                 |         |       |
| <b>Comparable:</b> | 263                                               | 263                                               |         |       |
|                    | Daubentonia.vs.Rhinolophus.vs.Propithecus         | Propithecus.vs.Rhinolophus.vs.Daubentonia         | 1       | 0     |
| <b>Convergent:</b> | 0                                                 | 1                                                 |         |       |
| <b>Comparable:</b> | 263                                               | 263                                               |         |       |
|                    | Daubentonia.vs.Pteropus.vs.Propithecus            | Propithecus.vs.Pteropus.vs.Daubentonia            | 1       | N/A   |
| <b>Convergent:</b> | 0                                                 | 0                                                 |         |       |
| <b>Comparable:</b> | 263                                               | 263                                               |         |       |
|                    | Daubentonia.vs.Eidolon.vs.Propithecus             | Propithecus.vs.Eidolon.vs.Daubentonia             | 1       | N/A   |
| <b>Convergent:</b> | 0                                                 | 0                                                 |         |       |
| <b>Comparable:</b> | 263                                               | 263                                               |         |       |
|                    | Daubentonia.vs.Tursiops.vs.Propithecus            | Propithecus.vs.Tursiops.vs.Daubentonia            | 1       | 0     |
| <b>Convergent:</b> | 0                                                 | 1                                                 |         |       |
| <b>Comparable:</b> | 263                                               | 263                                               |         |       |
|                    | Daubentonia.vs.Bos.vs.Propithecus                 | Propithecus.vs.Bos.vs.Daubentonia                 | 1       | N/A   |
| <b>Convergent:</b> | 0                                                 | 0                                                 |         |       |
| <b>Comparable:</b> | 263                                               | 263                                               |         |       |

|                    | <b>Species 1: Species 2 &amp; not Species 3 or Consensus</b> | <b>Species 3: Species 2 &amp; not Species 1 or Consensus</b> | <b>P-value</b> | <b>Ratio</b> |
|--------------------|--------------------------------------------------------------|--------------------------------------------------------------|----------------|--------------|
|                    | Daubentonia.vs.Mus.vs.Propithecus                            | Propithecus.vs.Mus.vs.Daubentonia                            | 1              | N/A          |
| <b>Convergent:</b> | 0                                                            | 0                                                            |                |              |
| <b>Comparable:</b> | 263                                                          | 263                                                          |                |              |
|                    | Daubentonia.vs.Oryctolagus.vs.Propithecus                    | Propithecus.vs.Oryctolagus.vs.Daubentonia                    | 1              | N/A          |
| <b>Convergent:</b> | 0                                                            | 0                                                            |                |              |
| <b>Comparable:</b> | 263                                                          | 263                                                          |                |              |
|                    | Daubentonia.vs.Loiodonta.vs.Propithecus                      | Propithecus.vs.Loiodonta.vs.Daubentonia                      | 1              | 0            |
| <b>Convergent:</b> | 0                                                            | 1                                                            |                |              |
| <b>Comparable:</b> | 263                                                          | 263                                                          |                |              |
|                    | Megaderma.vs.Daubentonia.vs.Pteropus                         | Pteropus.vs.Daubentonia.vs.Megaderma                         | 1              | N/A          |
| <b>Convergent:</b> | 0                                                            | 0                                                            |                |              |
| <b>Comparable:</b> | 276                                                          | 276                                                          |                |              |
|                    | Megaderma.vs.Daubentonia.vs.Eidolon                          | Eidolon.vs.Daubentonia.vs.Megaderma                          | 1              | N/A          |
| <b>Convergent:</b> | 0                                                            | 0                                                            |                |              |
| <b>Comparable:</b> | 276                                                          | 276                                                          |                |              |
|                    | Megaderma.vs.Propithecus.vs.Pteropus                         | Pteropus.vs.Propithecus.vs.Megaderma                         | 1              | N/A          |
| <b>Convergent:</b> | 0                                                            | 0                                                            |                |              |
| <b>Comparable:</b> | 264                                                          | 264                                                          |                |              |
|                    | Megaderma.vs.Propithecus.vs.Eidolon                          | Eidolon.vs.Propithecus.vs.Megaderma                          | 1              | N/A          |
| <b>Convergent:</b> | 0                                                            | 0                                                            |                |              |
| <b>Comparable:</b> | 264                                                          | 264                                                          |                |              |
|                    | Megaderma.vs.Homo.vs.Pteropus                                | Pteropus.vs.Homo.vs.Megaderma                                | 1              | N/A          |
| <b>Convergent:</b> | 0                                                            | 0                                                            |                |              |
| <b>Comparable:</b> | 278                                                          | 278                                                          |                |              |
|                    | Megaderma.vs.Homo.vs.Eidolon                                 | Eidolon.vs.Homo.vs.Megaderma                                 | 1              | N/A          |
| <b>Convergent:</b> | 0                                                            | 0                                                            |                |              |
| <b>Comparable:</b> | 278                                                          | 278                                                          |                |              |
|                    | Megaderma.vs.Pteronotus.vs.Pteropus                          | Pteropus.vs.Pteronotus.vs.Megaderma                          | 1              | N/A          |
| <b>Convergent:</b> | 1                                                            | 0                                                            |                |              |
| <b>Comparable:</b> | 278                                                          | 278                                                          |                |              |

|                    | <b>Species 1: Species 2 &amp; not Species 3 or Consensus</b> | <b>Species 3: Species 2 &amp; not Species 1 or Consensus</b> | <b>P-value</b> | <b>Ratio</b> |
|--------------------|--------------------------------------------------------------|--------------------------------------------------------------|----------------|--------------|
|                    | Megaderma.vs.Pteronotus.vs.Eidolon                           | Eidolon.vs.Pteronotus.vs.Megaderma                           | 1              | N/A          |
| <b>Convergent:</b> | 1                                                            | 0                                                            |                |              |
| <b>Comparable:</b> | 278                                                          | 278                                                          |                |              |
|                    | Megaderma.vs.Myotis.vs.Pteropus                              | Pteropus.vs.Myotis.vs.Megaderma                              | 0.2487         | N/A          |
| <b>Convergent:</b> | 3                                                            | 0                                                            |                |              |
| <b>Comparable:</b> | 278                                                          | 278                                                          |                |              |
|                    | Megaderma.vs.Myotis.vs.Eidolon                               | Eidolon.vs.Myotis.vs.Megaderma                               | 0.2487         | N/A          |
| <b>Convergent:</b> | 3                                                            | 0                                                            |                |              |
| <b>Comparable:</b> | 278                                                          | 278                                                          |                |              |
|                    | Megaderma.vs.Rhinolophus.vs.Pteropus                         | Pteropus.vs.Rhinolophus.vs.Megaderma                         | 0.4991         | N/A          |
| <b>Convergent:</b> | 2                                                            | 0                                                            |                |              |
| <b>Comparable:</b> | 278                                                          | 278                                                          |                |              |
|                    | Megaderma.vs.Rhinolophus.vs.Eidolon                          | Eidolon.vs.Rhinolophus.vs.Megaderma                          | 0.4991         | N/A          |
| <b>Convergent:</b> | 2                                                            | 0                                                            |                |              |
| <b>Comparable:</b> | 278                                                          | 278                                                          |                |              |
|                    | Megaderma.vs.Pteropus.vs.Eidolon                             | Eidolon.vs.Pteropus.vs.Megaderma                             | 1              | N/A          |
| <b>Convergent:</b> | 0                                                            | 0                                                            |                |              |
| <b>Comparable:</b> | 278                                                          | 278                                                          |                |              |
|                    | Megaderma.vs.Eidolon.vs.Pteropus                             | Pteropus.vs.Eidolon.vs.Megaderma                             | 1              | N/A          |
| <b>Convergent:</b> | 0                                                            | 0                                                            |                |              |
| <b>Comparable:</b> | 278                                                          | 278                                                          |                |              |
|                    | Megaderma.vs.Tursiops.vs.Pteropus                            | Pteropus.vs.Tursiops.vs.Megaderma                            | 0.4991         | N/A          |
| <b>Convergent:</b> | 2                                                            | 0                                                            |                |              |
| <b>Comparable:</b> | 278                                                          | 278                                                          |                |              |
|                    | Megaderma.vs.Tursiops.vs.Eidolon                             | Eidolon.vs.Tursiops.vs.Megaderma                             | 0.4991         | N/A          |
| <b>Convergent:</b> | 2                                                            | 0                                                            |                |              |
| <b>Comparable:</b> | 278                                                          | 278                                                          |                |              |
|                    | Megaderma.vs.Bos.vs.Pteropus                                 | Pteropus.vs.Bos.vs.Megaderma                                 | 1              | N/A          |
| <b>Convergent:</b> | 1                                                            | 0                                                            |                |              |
| <b>Comparable:</b> | 278                                                          | 278                                                          |                |              |



|                    | <b>Species 1: Species 2 &amp; not Species 3 or Consensus</b> | <b>Species 3: Species 2 &amp; not Species 1 or Consensus</b> | <b>P-value</b> | <b>Ratio</b> |
|--------------------|--------------------------------------------------------------|--------------------------------------------------------------|----------------|--------------|
|                    | Megaderma.vs.Bos.vs.Eidolon                                  | Eidolon.vs.Bos.vs.Megaderma                                  | 1              | N/A          |
| <b>Convergent:</b> | 1                                                            | 0                                                            |                |              |
| <b>Comparable:</b> | 278                                                          | 278                                                          |                |              |
|                    | Megaderma.vs.Mus.vs.Pteropus                                 | Pteropus.vs.Mus.vs.Megaderma                                 | 1              | 1            |
| <b>Convergent:</b> | 1                                                            | 1                                                            |                |              |
| <b>Comparable:</b> | 278                                                          | 278                                                          |                |              |
|                    | Megaderma.vs.Mus.vs.Eidolon                                  | Eidolon.vs.Mus.vs.Megaderma                                  | 1              | N/A          |
| <b>Convergent:</b> | 1                                                            | 0                                                            |                |              |
| <b>Comparable:</b> | 278                                                          | 278                                                          |                |              |
|                    | Megaderma.vs.Oryctolagus.vs.Pteropus                         | Pteropus.vs.Oryctolagus.vs.Megaderma                         | 1              | N/A          |
| <b>Convergent:</b> | 0                                                            | 0                                                            |                |              |
| <b>Comparable:</b> | 278                                                          | 278                                                          |                |              |
|                    | Megaderma.vs.Oryctolagus.vs.Eidolon                          | Eidolon.vs.Oryctolagus.vs.Megaderma                          | 1              | N/A          |
| <b>Convergent:</b> | 0                                                            | 0                                                            |                |              |
| <b>Comparable:</b> | 278                                                          | 278                                                          |                |              |
|                    | Megaderma.vs.Loxodonta.vs.Pteropus                           | Pteropus.vs.Loxodonta.vs.Megaderma                           | 1              | N/A          |
| <b>Convergent:</b> | 1                                                            | 0                                                            |                |              |
| <b>Comparable:</b> | 278                                                          | 278                                                          |                |              |
|                    | Megaderma.vs.Loxodonta.vs.Eidolon                            | Eidolon.vs.Loxodonta.vs.Megaderma                            | 1              | N/A          |
| <b>Convergent:</b> | 1                                                            | 0                                                            |                |              |
| <b>Comparable:</b> | 278                                                          | 278                                                          |                |              |
|                    | Rhinolophus.vs.Daubentonia.vs.Pteropus                       | Pteropus.vs.Daubentonia.vs.Rhinolophus                       | 1              | N/A          |
| <b>Convergent:</b> | 0                                                            | 0                                                            |                |              |
| <b>Comparable:</b> | 276                                                          | 276                                                          |                |              |
|                    | Rhinolophus.vs.Daubentonia.vs.Eidolon                        | Eidolon.vs.Daubentonia.vs.Rhinolophus                        | 1              | N/A          |
| <b>Convergent:</b> | 0                                                            | 0                                                            |                |              |
| <b>Comparable:</b> | 276                                                          | 276                                                          |                |              |
|                    | Rhinolophus.vs.Propithecus.vs.Pteropus                       | Pteropus.vs.Propithecus.vs.Rhinolophus                       | 1              | N/A          |
| <b>Convergent:</b> | 1                                                            | 0                                                            |                |              |
| <b>Comparable:</b> | 264                                                          | 264                                                          |                |              |

|                    | <b>Species 1: Species 2 &amp; not Species 3 or Consensus</b> | <b>Species 3: Species 2 &amp; not Species 1 or Consensus</b> | <b>P-value</b> | <b>Ratio</b> |
|--------------------|--------------------------------------------------------------|--------------------------------------------------------------|----------------|--------------|
|                    | Rhinolophus.vs.Propithecus.vs.Eidolon                        | Eidolon.vs.Propithecus.vs.Rhinolophus                        | 1              | N/A          |
| <b>Convergent:</b> | 1                                                            | 0                                                            |                |              |
| <b>Comparable:</b> | 264                                                          | 264                                                          |                |              |
|                    | Rhinolophus.vs.Homo.vs.Pteropus                              | Pteropus.vs.Homo.vs.Rhinolophus                              | 1              | N/A          |
| <b>Convergent:</b> | 1                                                            | 0                                                            |                |              |
| <b>Comparable:</b> | 278                                                          | 278                                                          |                |              |
|                    | Rhinolophus.vs.Homo.vs.Eidolon                               | Eidolon.vs.Homo.vs.Rhinolophus                               | 1              | N/A          |
| <b>Convergent:</b> | 1                                                            | 0                                                            |                |              |
| <b>Comparable:</b> | 278                                                          | 278                                                          |                |              |
|                    | Rhinolophus.vs.Pteronotus.vs.Pteropus                        | Pteropus.vs.Pteronotus.vs.Rhinolophus                        | 0.4991         | N/A          |
| <b>Convergent:</b> | 2                                                            | 0                                                            |                |              |
| <b>Comparable:</b> | 278                                                          | 278                                                          |                |              |
|                    | Rhinolophus.vs.Pteronotus.vs.Eidolon                         | Eidolon.vs.Pteronotus.vs.Rhinolophus                         | 0.4991         | N/A          |
| <b>Convergent:</b> | 2                                                            | 0                                                            |                |              |
| <b>Comparable:</b> | 278                                                          | 278                                                          |                |              |
|                    | Rhinolophus.vs.Myotis.vs.Pteropus                            | Pteropus.vs.Myotis.vs.Rhinolophus                            | 0.1237         | N/A          |
| <b>Convergent:</b> | 4                                                            | 0                                                            |                |              |
| <b>Comparable:</b> | 278                                                          | 278                                                          |                |              |
|                    | Rhinolophus.vs.Myotis.vs.Eidolon                             | Eidolon.vs.Myotis.vs.Rhinolophus                             | 0.1237         | N/A          |
| <b>Convergent:</b> | 4                                                            | 0                                                            |                |              |
| <b>Comparable:</b> | 278                                                          | 278                                                          |                |              |
|                    | Rhinolophus.vs.Megaderma.vs.Pteropus                         | Pteropus.vs.Megaderma.vs.Rhinolophus                         | 0.4991         | N/A          |
| <b>Convergent:</b> | 2                                                            | 0                                                            |                |              |
| <b>Comparable:</b> | 278                                                          | 278                                                          |                |              |
|                    | Rhinolophus.vs.Megaderma.vs.Eidolon                          | Eidolon.vs.Megaderma.vs.Rhinolophus                          | 0.4991         | N/A          |
| <b>Convergent:</b> | 2                                                            | 0                                                            |                |              |
| <b>Comparable:</b> | 278                                                          | 278                                                          |                |              |
|                    | Rhinolophus.vs.Pteropus.vs.Eidolon                           | Eidolon.vs.Pteropus.vs.Rhinolophus                           | 1              | N/A          |
| <b>Convergent:</b> | 0                                                            | 0                                                            |                |              |
| <b>Comparable:</b> | 278                                                          | 278                                                          |                |              |

|                    | <b>Species 1: Species 2 &amp; not Species 3 or Consensus</b> | <b>Species 3: Species 2 &amp; not Species 1 or Consensus</b> | <b>P-value</b> | <b>Ratio</b> |
|--------------------|--------------------------------------------------------------|--------------------------------------------------------------|----------------|--------------|
|                    | Rhinolophus.vs.Eidolon.vs.Pteropus                           | Pteropus.vs.Eidolon.vs.Rhinolophus                           | 1              | N/A          |
| <b>Convergent:</b> | 0                                                            | 0                                                            |                |              |
| <b>Comparable:</b> | 278                                                          | 278                                                          |                |              |
|                    | Rhinolophus.vs.Tursiops.vs.Pteropus                          | Pteropus.vs.Tursiops.vs.Rhinolophus                          | 0.2487         | N/A          |
| <b>Convergent:</b> | 3                                                            | 0                                                            |                |              |
| <b>Comparable:</b> | 278                                                          | 278                                                          |                |              |
|                    | Rhinolophus.vs.Tursiops.vs.Eidolon                           | Eidolon.vs.Tursiops.vs.Rhinolophus                           | 0.2487         | N/A          |
| <b>Convergent:</b> | 3                                                            | 0                                                            |                |              |
| <b>Comparable:</b> | 278                                                          | 278                                                          |                |              |
|                    | Rhinolophus.vs.Bos.vs.Pteropus                               | Pteropus.vs.Bos.vs.Rhinolophus                               | 1              | N/A          |
| <b>Convergent:</b> | 1                                                            | 0                                                            |                |              |
| <b>Comparable:</b> | 278                                                          | 278                                                          |                |              |
|                    | Rhinolophus.vs.Bos.vs.Eidolon                                | Eidolon.vs.Bos.vs.Rhinolophus                                | 1              | N/A          |
| <b>Convergent:</b> | 1                                                            | 0                                                            |                |              |
| <b>Comparable:</b> | 278                                                          | 278                                                          |                |              |
|                    | Rhinolophus.vs.Mus.vs.Pteropus                               | Pteropus.vs.Mus.vs.Rhinolophus                               | 1              | 1            |
| <b>Convergent:</b> | 1                                                            | 1                                                            |                |              |
| <b>Comparable:</b> | 278                                                          | 278                                                          |                |              |
|                    | Rhinolophus.vs.Mus.vs.Eidolon                                | Eidolon.vs.Mus.vs.Rhinolophus                                | 1              | N/A          |
| <b>Convergent:</b> | 1                                                            | 0                                                            |                |              |
| <b>Comparable:</b> | 278                                                          | 278                                                          |                |              |
|                    | Rhinolophus.vs.Oryctolagus.vs.Pteropus                       | Pteropus.vs.Oryctolagus.vs.Rhinolophus                       | 1              | N/A          |
| <b>Convergent:</b> | 0                                                            | 0                                                            |                |              |
| <b>Comparable:</b> | 278                                                          | 278                                                          |                |              |
|                    | Rhinolophus.vs.Oryctolagus.vs.Eidolon                        | Eidolon.vs.Oryctolagus.vs.Rhinolophus                        | 1              | N/A          |
| <b>Convergent:</b> | 0                                                            | 0                                                            |                |              |
| <b>Comparable:</b> | 278                                                          | 278                                                          |                |              |
|                    | Rhinolophus.vs.Loxodonta.vs.Pteropus                         | Pteropus.vs.Loxodonta.vs.Rhinolophus                         | 1              | N/A          |
| <b>Convergent:</b> | 1                                                            | 0                                                            |                |              |
| <b>Comparable:</b> | 278                                                          | 278                                                          |                |              |

|                    | <b>Species 1: Species 2 &amp; not Species 3 or Consensus</b> | <b>Species 3: Species 2 &amp; not Species 1 or Consensus</b> | <b>P-value</b> | <b>Ratio</b> |
|--------------------|--------------------------------------------------------------|--------------------------------------------------------------|----------------|--------------|
|                    | Rhinolophus.vs.Loiodonta.vs.Eidolon                          | Eidolon.vs.Loiodonta.vs.Rhinolophus                          | 1              | N/A          |
| <b>Convergent:</b> | 1                                                            | 0                                                            |                |              |
| <b>Comparable:</b> | 278                                                          | 278                                                          |                |              |
|                    | Tursiops.vs.Daubentonia.vs.Bos                               | Bos.vs.Daubentonia.vs.Tursiops                               | 1              | N/A          |
| <b>Convergent:</b> | 1                                                            | 0                                                            |                |              |
| <b>Comparable:</b> | 276                                                          | 276                                                          |                |              |
|                    | Tursiops.vs.Propithecus.vs.Bos                               | Bos.vs.Propithecus.vs.Tursiops                               | 0.4991         | N/A          |
| <b>Convergent:</b> | 2                                                            | 0                                                            |                |              |
| <b>Comparable:</b> | 264                                                          | 264                                                          |                |              |
|                    | Tursiops.vs.Homo.vs.Bos                                      | Bos.vs.Homo.vs.Tursiops                                      | 1              | N/A          |
| <b>Convergent:</b> | 0                                                            | 0                                                            |                |              |
| <b>Comparable:</b> | 278                                                          | 278                                                          |                |              |
|                    | Tursiops.vs.Pteronotus.vs.Bos                                | Bos.vs.Pteronotus.vs.Tursiops                                | 1              | N/A          |
| <b>Convergent:</b> | 1                                                            | 0                                                            |                |              |
| <b>Comparable:</b> | 278                                                          | 278                                                          |                |              |
|                    | Tursiops.vs.Myotis.vs.Bos                                    | Bos.vs.Myotis.vs.Tursiops                                    | 0.4991         | N/A          |
| <b>Convergent:</b> | 2                                                            | 0                                                            |                |              |
| <b>Comparable:</b> | 278                                                          | 278                                                          |                |              |
|                    | Tursiops.vs.Megaderma.vs.Bos                                 | Bos.vs.Megaderma.vs.Tursiops                                 | 1              | N/A          |
| <b>Convergent:</b> | 1                                                            | 0                                                            |                |              |
| <b>Comparable:</b> | 278                                                          | 278                                                          |                |              |
|                    | Tursiops.vs.Rhinolophus.vs.Bos                               | Bos.vs.Rhinolophus.vs.Tursiops                               | 0.4991         | N/A          |
| <b>Convergent:</b> | 2                                                            | 0                                                            |                |              |
| <b>Comparable:</b> | 278                                                          | 278                                                          |                |              |
|                    | Tursiops.vs.Pteropus.vs.Bos                                  | Bos.vs.Pteropus.vs.Tursiops                                  | 1              | N/A          |
| <b>Convergent:</b> | 0                                                            | 0                                                            |                |              |
| <b>Comparable:</b> | 278                                                          | 278                                                          |                |              |
|                    | Tursiops.vs.Eidolon.vs.Bos                                   | Bos.vs.Eidolon.vs.Tursiops                                   | 1              | N/A          |
| <b>Convergent:</b> | 0                                                            | 0                                                            |                |              |
| <b>Comparable:</b> | 278                                                          | 278                                                          |                |              |

|                    | Species 1: Species 2 & not Species 3 or Consensus | Species 3: Species 2 & not Species 1 or Consensus | P-value | Ratio |
|--------------------|---------------------------------------------------|---------------------------------------------------|---------|-------|
|                    | Tursiops.vs.Mus.vs.Bos                            | Bos.vs.Mus.vs.Tursiops                            | 1       | N/A   |
| <b>Convergent:</b> | 0                                                 | 0                                                 |         |       |
| <b>Comparable:</b> | 278                                               | 278                                               |         |       |
|                    | Tursiops.vs.Oryctolagus.vs.Bos                    | Bos.vs.Oryctolagus.vs.Tursiops                    | 1       | N/A   |
| <b>Convergent:</b> | 0                                                 | 0                                                 |         |       |
| <b>Comparable:</b> | 278                                               | 278                                               |         |       |
|                    | Tursiops.vs.Loiodonta.vs.Bos                      | Bos.vs.Loiodonta.vs.Tursiops                      | 0.4991  | N/A   |
| <b>Convergent:</b> | 2                                                 | 0                                                 |         |       |
| <b>Comparable:</b> | 278                                               | 278                                               |         |       |
|                    | Mus.vs.Daubentonia.vs.Oryctolagus                 | Oryctolagus.vs.Daubentonia.vs.Mus                 | 1       | N/A   |
| <b>Convergent:</b> | 0                                                 | 0                                                 |         |       |
| <b>Comparable:</b> | 276                                               | 276                                               |         |       |
|                    | Mus.vs.Propithecus.vs.Oryctolagus                 | Oryctolagus.vs.Propithecus.vs.Mus                 | 1       | N/A   |
| <b>Convergent:</b> | 0                                                 | 0                                                 |         |       |
| <b>Comparable:</b> | 264                                               | 264                                               |         |       |
|                    | Mus.vs.Homo.vs.Oryctolagus                        | Oryctolagus.vs.Homo.vs.Mus                        | 1       | N/A   |
| <b>Convergent:</b> | 0                                                 | 0                                                 |         |       |
| <b>Comparable:</b> | 278                                               | 278                                               |         |       |
|                    | Mus.vs.Pteronotus.vs.Oryctolagus                  | Oryctolagus.vs.Pteronotus.vs.Mus                  | 1       | N/A   |
| <b>Convergent:</b> | 1                                                 | 0                                                 |         |       |
| <b>Comparable:</b> | 278                                               | 278                                               |         |       |
|                    | Mus.vs.Myotis.vs.Oryctolagus                      | Oryctolagus.vs.Myotis.vs.Mus                      | 1       | N/A   |
| <b>Convergent:</b> | 1                                                 | 0                                                 |         |       |
| <b>Comparable:</b> | 278                                               | 278                                               |         |       |
|                    | Mus.vs.Megaderma.vs.Oryctolagus                   | Oryctolagus.vs.Megaderma.vs.Mus                   | 1       | N/A   |
| <b>Convergent:</b> | 1                                                 | 0                                                 |         |       |
| <b>Comparable:</b> | 278                                               | 278                                               |         |       |
|                    | Mus.vs.Rhinolophus.vs.Oryctolagus                 | Oryctolagus.vs.Rhinolophus.vs.Mus                 | 1       | N/A   |
| <b>Convergent:</b> | 1                                                 | 0                                                 |         |       |
| <b>Comparable:</b> | 278                                               | 278                                               |         |       |

|                    | <b>Species 1: Species 2 &amp; not Species 3 or Consensus</b> | <b>Species 3: Species 2 &amp; not Species 1 or Consensus</b> | <b>P-value</b> | <b>Ratio</b> |
|--------------------|--------------------------------------------------------------|--------------------------------------------------------------|----------------|--------------|
|                    | Mus.vs.Pteropus.vs.Oryctolagus                               | Oryctolagus.vs.Pteropus.vs.Mus                               | 1              | N/A          |
| <b>Convergent:</b> | 1                                                            | 0                                                            |                |              |
| <b>Comparable:</b> | 278                                                          | 278                                                          |                |              |
|                    | Mus.vs.Eidolon.vs.Oryctolagus                                | Oryctolagus.vs.Eidolon.vs.Mus                                | 1              | N/A          |
| <b>Convergent:</b> | 0                                                            | 0                                                            |                |              |
| <b>Comparable:</b> | 278                                                          | 278                                                          |                |              |
|                    | Mus.vs.Tursiops.vs.Oryctolagus                               | Oryctolagus.vs.Tursiops.vs.Mus                               | 1              | N/A          |
| <b>Convergent:</b> | 1                                                            | 0                                                            |                |              |
| <b>Comparable:</b> | 278                                                          | 278                                                          |                |              |
|                    | Mus.vs.Bos.vs.Oryctolagus                                    | Oryctolagus.vs.Bos.vs.Mus                                    | 1              | N/A          |
| <b>Convergent:</b> | 1                                                            | 0                                                            |                |              |
| <b>Comparable:</b> | 278                                                          | 278                                                          |                |              |
|                    | Mus.vs.Loiodonta.vs.Oryctolagus                              | Oryctolagus.vs.Loiodonta.vs.Mus                              | 0.4991         | N/A          |
| <b>Convergent:</b> | 2                                                            | 0                                                            |                |              |
| <b>Comparable:</b> | 278                                                          | 278                                                          |                |              |

# SLC26A5 (*Prestin*)

|                    | Species 1: Species 2 & not Species 3 or Consensus | Species 3: Species 2 & not Species 1 or Consensus | P-value | Ratio |
|--------------------|---------------------------------------------------|---------------------------------------------------|---------|-------|
|                    | Daubentonia.vs.Homo.vs.Propithecus                | Propithecus.vs.Homo.vs.Daubentonia                | 1       | N/A   |
| <b>Convergent:</b> | 1                                                 | 0                                                 |         |       |
| <b>Comparable:</b> | 651                                               | 651                                               |         |       |
|                    | Daubentonia.vs.Pteronotus.vs.Propithecus          | Propithecus.vs.Pteronotus.vs.Daubentonia          | 1       | N/A   |
| <b>Convergent:</b> | 0                                                 | 0                                                 |         |       |
| <b>Comparable:</b> | 645                                               | 645                                               |         |       |
|                    | Daubentonia.vs.Myotis.vs.Propithecus              | Propithecus.vs.Myotis.vs.Daubentonia              | 1       | N/A   |
| <b>Convergent:</b> | 1                                                 | 0                                                 |         |       |
| <b>Comparable:</b> | 651                                               | 651                                               |         |       |
|                    | Daubentonia.vs.Rhinolophus.vs.Propithecus         | Propithecus.vs.Rhinolophus.vs.Daubentonia         | 1       | N/A   |
| <b>Convergent:</b> | 0                                                 | 0                                                 |         |       |
| <b>Comparable:</b> | 651                                               | 651                                               |         |       |
|                    | Daubentonia.vs.Megaderma.vs.Propithecus           | Propithecus.vs.Megaderma.vs.Daubentonia           | 1       | N/A   |
| <b>Convergent:</b> | 0                                                 | 0                                                 |         |       |
| <b>Comparable:</b> | 651                                               | 651                                               |         |       |
|                    | Daubentonia.vs.Pteropus.vs.Propithecus            | Propithecus.vs.Pteropus.vs.Daubentonia            | 1       | N/A   |
| <b>Convergent:</b> | 1                                                 | 0                                                 |         |       |
| <b>Comparable:</b> | 650                                               | 650                                               |         |       |
|                    | Daubentonia.vs.Eidolon.vs.Propithecus             | Propithecus.vs.Eidolon.vs.Daubentonia             | 1       | N/A   |
| <b>Convergent:</b> | 1                                                 | 0                                                 |         |       |
| <b>Comparable:</b> | 594                                               | 594                                               |         |       |
|                    | Daubentonia.vs.Tursiops.vs.Propithecus            | Propithecus.vs.Tursiops.vs.Daubentonia            | 1       | N/A   |
| <b>Convergent:</b> | 1                                                 | 0                                                 |         |       |
| <b>Comparable:</b> | 651                                               | 651                                               |         |       |
|                    | Daubentonia.vs.Bos.vs.Propithecus                 | Propithecus.vs.Bos.vs.Daubentonia                 | 1       | N/A   |
| <b>Convergent:</b> | 1                                                 | 0                                                 |         |       |
| <b>Comparable:</b> | 651                                               | 651                                               |         |       |

|                    | <b>Species 1: Species 2 &amp; not Species 3 or Consensus</b> | <b>Species 3: Species 2 &amp; not Species 1 or Consensus</b> | <b>P-value</b> | <b>Ratio</b> |
|--------------------|--------------------------------------------------------------|--------------------------------------------------------------|----------------|--------------|
|                    | Daubentonia.vs.Mus.vs.Propithecus                            | Propithecus.vs.Mus.vs.Daubentonia                            | 0.4996         | N/A          |
| <b>Convergent:</b> | 2                                                            | 0                                                            |                |              |
| <b>Comparable:</b> | 651                                                          | 651                                                          |                |              |
|                    | Daubentonia.vs.Oryctolagus.vs.Propithecus                    | Propithecus.vs.Oryctolagus.vs.Daubentonia                    | 0.2494         | N/A          |
| <b>Convergent:</b> | 3                                                            | 0                                                            |                |              |
| <b>Comparable:</b> | 651                                                          | 651                                                          |                |              |
|                    | Daubentonia.vs.Loxodonta.vs.Propithecus                      | Propithecus.vs.Loxodonta.vs.Daubentonia                      | 1              | N/A          |
| <b>Convergent:</b> | 1                                                            | 0                                                            |                |              |
| <b>Comparable:</b> | 649                                                          | 649                                                          |                |              |
|                    | Rhinolophus.vs.Daubentonia.vs.Pteropus                       | Pteropus.vs.Daubentonia.vs.Rhinolophus                       | 1              | 1            |
| <b>Convergent:</b> | 1                                                            | 1                                                            |                |              |
| <b>Comparable:</b> | 663                                                          | 663                                                          |                |              |
|                    | Rhinolophus.vs.Daubentonia.vs.Eidolon                        | Eidolon.vs.Daubentonia.vs.Rhinolophus                        | 1              | 1            |
| <b>Convergent:</b> | 1                                                            | 1                                                            |                |              |
| <b>Comparable:</b> | 600                                                          | 600                                                          |                |              |
|                    | Rhinolophus.vs.Propithecus.vs.Pteropus                       | Pteropus.vs.Propithecus.vs.Rhinolophus                       | 1              | N/A          |
| <b>Convergent:</b> | 1                                                            | 0                                                            |                |              |
| <b>Comparable:</b> | 655                                                          | 655                                                          |                |              |
|                    | Rhinolophus.vs.Propithecus.vs.Eidolon                        | Eidolon.vs.Propithecus.vs.Rhinolophus                        | 1              | N/A          |
| <b>Convergent:</b> | 1                                                            | 0                                                            |                |              |
| <b>Comparable:</b> | 599                                                          | 599                                                          |                |              |
|                    | Rhinolophus.vs.Homo.vs.Pteropus                              | Pteropus.vs.Homo.vs.Rhinolophus                              | 1              | 0            |
| <b>Convergent:</b> | 0                                                            | 1                                                            |                |              |
| <b>Comparable:</b> | 670                                                          | 670                                                          |                |              |
|                    | Rhinolophus.vs.Homo.vs.Eidolon                               | Eidolon.vs.Homo.vs.Rhinolophus                               | 1              | N/A          |
| <b>Convergent:</b> | 0                                                            | 0                                                            |                |              |
| <b>Comparable:</b> | 607                                                          | 607                                                          |                |              |
|                    | Rhinolophus.vs.Pteronotus.vs.Pteropus                        | Pteropus.vs.Pteronotus.vs.Rhinolophus                        | 0.6244         | 3            |
| <b>Convergent:</b> | 3                                                            | 1                                                            |                |              |
| <b>Comparable:</b> | 664                                                          | 664                                                          |                |              |



|                    | <b>Species 1: Species 2 &amp; not Species 3 or Consensus</b> | <b>Species 3: Species 2 &amp; not Species 1 or Consensus</b> | <b>P-value</b> | <b>Ratio</b> |
|--------------------|--------------------------------------------------------------|--------------------------------------------------------------|----------------|--------------|
|                    | Rhinolophus.vs.Pteronotus.vs.Eidolon                         | Eidolon.vs.Pteronotus.vs.Rhinolophus                         | 0.4996         | N/A          |
| <b>Convergent:</b> | 2                                                            | 0                                                            |                |              |
| <b>Comparable:</b> | 607                                                          | 607                                                          |                |              |
|                    | Rhinolophus.vs.Myotis.vs.Pteropus                            | Pteropus.vs.Myotis.vs.Rhinolophus                            | 0.124          | 6            |
| <b>Convergent:</b> | 6                                                            | 1                                                            |                |              |
| <b>Comparable:</b> | 670                                                          | 670                                                          |                |              |
|                    | Rhinolophus.vs.Myotis.vs.Eidolon                             | Eidolon.vs.Myotis.vs.Rhinolophus                             | 0.1244         | N/A          |
| <b>Convergent:</b> | 4                                                            | 0                                                            |                |              |
| <b>Comparable:</b> | 607                                                          | 607                                                          |                |              |
|                    | Rhinolophus.vs.Megaderma.vs.Pteropus                         | Pteropus.vs.Megaderma.vs.Rhinolophus                         | 0.6244         | 3            |
| <b>Convergent:</b> | 3                                                            | 1                                                            |                |              |
| <b>Comparable:</b> | 670                                                          | 670                                                          |                |              |
|                    | Rhinolophus.vs.Megaderma.vs.Eidolon                          | Eidolon.vs.Megaderma.vs.Rhinolophus                          | 1              | 2            |
| <b>Convergent:</b> | 2                                                            | 1                                                            |                |              |
| <b>Comparable:</b> | 607                                                          | 607                                                          |                |              |
|                    | Rhinolophus.vs.Pteropus.vs.Eidolon                           | Eidolon.vs.Pteropus.vs.Rhinolophus                           | 0.2494         | 0            |
| <b>Convergent:</b> | 0                                                            | 3                                                            |                |              |
| <b>Comparable:</b> | 607                                                          | 607                                                          |                |              |
|                    | Rhinolophus.vs.Eidolon.vs.Pteropus                           | Pteropus.vs.Eidolon.vs.Rhinolophus                           | 0.2494         | 0            |
| <b>Convergent:</b> | 0                                                            | 3                                                            |                |              |
| <b>Comparable:</b> | 607                                                          | 607                                                          |                |              |
|                    | Rhinolophus.vs.Tursiops.vs.Pteropus                          | Pteropus.vs.Tursiops.vs.Rhinolophus                          | 0.007659       | N/A          |
| <b>Convergent:</b> | 8                                                            | 0                                                            |                |              |
| <b>Comparable:</b> | 670                                                          | 670                                                          |                |              |
|                    | Rhinolophus.vs.Tursiops.vs.Eidolon                           | Eidolon.vs.Tursiops.vs.Rhinolophus                           | 0.01537        | N/A          |
| <b>Convergent:</b> | 7                                                            | 0                                                            |                |              |
| <b>Comparable:</b> | 607                                                          | 607                                                          |                |              |
|                    | Rhinolophus.vs.Bos.vs.Pteropus                               | Pteropus.vs.Bos.vs.Rhinolophus                               | 1              | 2            |
| <b>Convergent:</b> | 2                                                            | 1                                                            |                |              |
| <b>Comparable:</b> | 670                                                          | 670                                                          |                |              |

|                    | <b>Species 1: Species 2 &amp; not Species 3 or Consensus</b> | <b>Species 3: Species 2 &amp; not Species 1 or Consensus</b> | <b>P-value</b> | <b>Ratio</b> |
|--------------------|--------------------------------------------------------------|--------------------------------------------------------------|----------------|--------------|
|                    | Rhinolophus.vs.Bos.vs.Eidolon                                | Eidolon.vs.Bos.vs.Rhinolophus                                | 1              | 2            |
| <b>Convergent:</b> | 2                                                            | 1                                                            |                |              |
| <b>Comparable:</b> | 607                                                          | 607                                                          |                |              |
|                    | Rhinolophus.vs.Mus.vs.Pteropus                               | Pteropus.vs.Mus.vs.Rhinolophus                               | 1              | N/A          |
| <b>Convergent:</b> | 1                                                            | 0                                                            |                |              |
| <b>Comparable:</b> | 670                                                          | 670                                                          |                |              |
|                    | Rhinolophus.vs.Mus.vs.Eidolon                                | Eidolon.vs.Mus.vs.Rhinolophus                                | 1              | N/A          |
| <b>Convergent:</b> | 1                                                            | 0                                                            |                |              |
| <b>Comparable:</b> | 607                                                          | 607                                                          |                |              |
|                    | Rhinolophus.vs.Oryctolagus.vs.Pteropus                       | Pteropus.vs.Oryctolagus.vs.Rhinolophus                       | 0.2494         | N/A          |
| <b>Convergent:</b> | 3                                                            | 0                                                            |                |              |
| <b>Comparable:</b> | 670                                                          | 670                                                          |                |              |
|                    | Rhinolophus.vs.Oryctolagus.vs.Eidolon                        | Eidolon.vs.Oryctolagus.vs.Rhinolophus                        | 0.2494         | N/A          |
| <b>Convergent:</b> | 3                                                            | 0                                                            |                |              |
| <b>Comparable:</b> | 607                                                          | 607                                                          |                |              |
|                    | Rhinolophus.vs.Loxodonta.vs.Pteropus                         | Pteropus.vs.Loxodonta.vs.Rhinolophus                         | 1              | N/A          |
| <b>Convergent:</b> | 0                                                            | 0                                                            |                |              |
| <b>Comparable:</b> | 667                                                          | 667                                                          |                |              |
|                    | Rhinolophus.vs.Loxodonta.vs.Eidolon                          | Eidolon.vs.Loxodonta.vs.Rhinolophus                          | 1              | N/A          |
| <b>Convergent:</b> | 0                                                            | 0                                                            |                |              |
| <b>Comparable:</b> | 604                                                          | 604                                                          |                |              |
|                    | Megaderma.vs.Daubentonia.vs.Pteropus                         | Pteropus.vs.Daubentonia.vs.Megaderma                         | 1              | 0            |
| <b>Convergent:</b> | 0                                                            | 1                                                            |                |              |
| <b>Comparable:</b> | 663                                                          | 663                                                          |                |              |
|                    | Megaderma.vs.Daubentonia.vs.Eidolon                          | Eidolon.vs.Daubentonia.vs.Megaderma                          | 1              | 0            |
| <b>Convergent:</b> | 0                                                            | 1                                                            |                |              |
| <b>Comparable:</b> | 600                                                          | 600                                                          |                |              |
|                    | Megaderma.vs.Propithecus.vs.Pteropus                         | Pteropus.vs.Propithecus.vs.Megaderma                         | 1              | N/A          |
| <b>Convergent:</b> | 0                                                            | 0                                                            |                |              |
| <b>Comparable:</b> | 655                                                          | 655                                                          |                |              |

|                    | <b>Species 1: Species 2 &amp; not Species 3 or Consensus</b> | <b>Species 3: Species 2 &amp; not Species 1 or Consensus</b> | <b>P-value</b> | <b>Ratio</b> |
|--------------------|--------------------------------------------------------------|--------------------------------------------------------------|----------------|--------------|
|                    | Megaderma.vs.Propithecus.vs.Eidolon                          | Eidolon.vs.Propithecus.vs.Megaderma                          | 1              | N/A          |
| <b>Convergent:</b> | 0                                                            | 0                                                            |                |              |
| <b>Comparable:</b> | 599                                                          | 599                                                          |                |              |
|                    | Megaderma.vs.Homo.vs.Pteropus                                | Pteropus.vs.Homo.vs.Megaderma                                | 1              | 0            |
| <b>Convergent:</b> | 0                                                            | 1                                                            |                |              |
| <b>Comparable:</b> | 670                                                          | 670                                                          |                |              |
|                    | Megaderma.vs.Homo.vs.Eidolon                                 | Eidolon.vs.Homo.vs.Megaderma                                 | 1              | N/A          |
| <b>Convergent:</b> | 0                                                            | 0                                                            |                |              |
| <b>Comparable:</b> | 607                                                          | 607                                                          |                |              |
|                    | Megaderma.vs.Pteronotus.vs.Pteropus                          | Pteropus.vs.Pteronotus.vs.Megaderma                          | 0.6244         | 3            |
| <b>Convergent:</b> | 3                                                            | 1                                                            |                |              |
| <b>Comparable:</b> | 664                                                          | 664                                                          |                |              |
|                    | Megaderma.vs.Pteronotus.vs.Eidolon                           | Eidolon.vs.Pteronotus.vs.Megaderma                           | 0.2494         | N/A          |
| <b>Convergent:</b> | 3                                                            | 0                                                            |                |              |
| <b>Comparable:</b> | 607                                                          | 607                                                          |                |              |
|                    | Megaderma.vs.Myotis.vs.Pteropus                              | Pteropus.vs.Myotis.vs.Megaderma                              | 0.03846        | 8            |
| <b>Convergent:</b> | 8                                                            | 1                                                            |                |              |
| <b>Comparable:</b> | 670                                                          | 670                                                          |                |              |
|                    | Megaderma.vs.Myotis.vs.Eidolon                               | Eidolon.vs.Myotis.vs.Megaderma                               | 0.062          | N/A          |
| <b>Convergent:</b> | 5                                                            | 0                                                            |                |              |
| <b>Comparable:</b> | 607                                                          | 607                                                          |                |              |
|                    | Megaderma.vs.Rhinolophus.vs.Pteropus                         | Pteropus.vs.Rhinolophus.vs.Megaderma                         | 0.2494         | N/A          |
| <b>Convergent:</b> | 3                                                            | 0                                                            |                |              |
| <b>Comparable:</b> | 670                                                          | 670                                                          |                |              |
|                    | Megaderma.vs.Rhinolophus.vs.Eidolon                          | Eidolon.vs.Rhinolophus.vs.Megaderma                          | 0.4996         | N/A          |
| <b>Convergent:</b> | 2                                                            | 0                                                            |                |              |
| <b>Comparable:</b> | 607                                                          | 607                                                          |                |              |
|                    | Megaderma.vs.Pteropus.vs.Eidolon                             | Eidolon.vs.Pteropus.vs.Megaderma                             | 0.4996         | 0            |
| <b>Convergent:</b> | 0                                                            | 2                                                            |                |              |
| <b>Comparable:</b> | 607                                                          | 607                                                          |                |              |

|                    | <b>Species 1: Species 2 &amp; not Species 3 or Consensus</b> | <b>Species 3: Species 2 &amp; not Species 1 or Consensus</b> | <b>P-value</b> | <b>Ratio</b> |
|--------------------|--------------------------------------------------------------|--------------------------------------------------------------|----------------|--------------|
|                    | Megaderma.vs.Eidolon.vs.Pteropus                             | Pteropus.vs.Eidolon.vs.Megaderma                             | 0.4996         | 0            |
| <b>Convergent:</b> | 0                                                            | 2                                                            |                |              |
| <b>Comparable:</b> | 607                                                          | 607                                                          |                |              |
|                    | Megaderma.vs.Tursiops.vs.Pteropus                            | Pteropus.vs.Tursiops.vs.Megaderma                            | 0.03091        | N/A          |
| <b>Convergent:</b> | 6                                                            | 0                                                            |                |              |
| <b>Comparable:</b> | 670                                                          | 670                                                          |                |              |
|                    | Megaderma.vs.Tursiops.vs.Eidolon                             | Eidolon.vs.Tursiops.vs.Megaderma                             | 0.062          | N/A          |
| <b>Convergent:</b> | 5                                                            | 0                                                            |                |              |
| <b>Comparable:</b> | 607                                                          | 607                                                          |                |              |
|                    | Megaderma.vs.Bos.vs.Pteropus                                 | Pteropus.vs.Bos.vs.Megaderma                                 | 1              | N/A          |
| <b>Convergent:</b> | 1                                                            | 0                                                            |                |              |
| <b>Comparable:</b> | 670                                                          | 670                                                          |                |              |
|                    | Megaderma.vs.Bos.vs.Eidolon                                  | Eidolon.vs.Bos.vs.Megaderma                                  | 1              | N/A          |
| <b>Convergent:</b> | 1                                                            | 0                                                            |                |              |
| <b>Comparable:</b> | 607                                                          | 607                                                          |                |              |
|                    | Megaderma.vs.Mus.vs.Pteropus                                 | Pteropus.vs.Mus.vs.Megaderma                                 | 0.4996         | N/A          |
| <b>Convergent:</b> | 2                                                            | 0                                                            |                |              |
| <b>Comparable:</b> | 670                                                          | 670                                                          |                |              |
|                    | Megaderma.vs.Mus.vs.Eidolon                                  | Eidolon.vs.Mus.vs.Megaderma                                  | 0.4996         | N/A          |
| <b>Convergent:</b> | 2                                                            | 0                                                            |                |              |
| <b>Comparable:</b> | 607                                                          | 607                                                          |                |              |
|                    | Megaderma.vs.Oryctolagus.vs.Pteropus                         | Pteropus.vs.Oryctolagus.vs.Megaderma                         | 1              | N/A          |
| <b>Convergent:</b> | 0                                                            | 0                                                            |                |              |
| <b>Comparable:</b> | 670                                                          | 670                                                          |                |              |
|                    | Megaderma.vs.Oryctolagus.vs.Eidolon                          | Eidolon.vs.Oryctolagus.vs.Megaderma                          | 1              | N/A          |
| <b>Convergent:</b> | 0                                                            | 0                                                            |                |              |
| <b>Comparable:</b> | 607                                                          | 607                                                          |                |              |
|                    | Megaderma.vs.Loxodonta.vs.Pteropus                           | Pteropus.vs.Loxodonta.vs.Megaderma                           | 1              | N/A          |
| <b>Convergent:</b> | 1                                                            | 0                                                            |                |              |
| <b>Comparable:</b> | 667                                                          | 667                                                          |                |              |

|                    | <b>Species 1: Species 2 &amp; not Species 3 or Consensus</b> | <b>Species 3: Species 2 &amp; not Species 1 or Consensus</b> | <b>P-value</b> | <b>Ratio</b> |
|--------------------|--------------------------------------------------------------|--------------------------------------------------------------|----------------|--------------|
|                    | Megaderma.vs.Loiodonta.vs.Eidolon                            | Eidolon.vs.Loiodonta.vs.Megaderma                            | 1              | N/A          |
| <b>Convergent:</b> | 0                                                            | 0                                                            |                |              |
| <b>Comparable:</b> | 604                                                          | 604                                                          |                |              |
|                    | Tursiops.vs.Daubentonia.vs.Bos                               | Bos.vs.Daubentonia.vs.Tursiops                               | 0.4996         | 0            |
| <b>Convergent:</b> | 0                                                            | 2                                                            |                |              |
| <b>Comparable:</b> | 664                                                          | 664                                                          |                |              |
|                    | Tursiops.vs.Propithecus.vs.Bos                               | Bos.vs.Propithecus.vs.Tursiops                               | 0.4996         | 0            |
| <b>Convergent:</b> | 0                                                            | 2                                                            |                |              |
| <b>Comparable:</b> | 656                                                          | 656                                                          |                |              |
|                    | Tursiops.vs.Homo.vs.Bos                                      | Bos.vs.Homo.vs.Tursiops                                      | 0.4996         | 0            |
| <b>Convergent:</b> | 0                                                            | 2                                                            |                |              |
| <b>Comparable:</b> | 671                                                          | 671                                                          |                |              |
|                    | Tursiops.vs.Pteronotus.vs.Bos                                | Bos.vs.Pteronotus.vs.Tursiops                                | 0.2494         | N/A          |
| <b>Convergent:</b> | 3                                                            | 0                                                            |                |              |
| <b>Comparable:</b> | 665                                                          | 665                                                          |                |              |
|                    | Tursiops.vs.Myotis.vs.Bos                                    | Bos.vs.Myotis.vs.Tursiops                                    | 0.06204        | N/A          |
| <b>Convergent:</b> | 5                                                            | 0                                                            |                |              |
| <b>Comparable:</b> | 671                                                          | 671                                                          |                |              |
|                    | Tursiops.vs.Rhinolophus.vs.Bos                               | Bos.vs.Rhinolophus.vs.Tursiops                               | 0.03091        | N/A          |
| <b>Convergent:</b> | 6                                                            | 0                                                            |                |              |
| <b>Comparable:</b> | 671                                                          | 671                                                          |                |              |
|                    | Tursiops.vs.Megaderma.vs.Bos                                 | Bos.vs.Megaderma.vs.Tursiops                                 | 0.2177         | 5            |
| <b>Convergent:</b> | 5                                                            | 1                                                            |                |              |
| <b>Comparable:</b> | 671                                                          | 671                                                          |                |              |
|                    | Tursiops.vs.Pteropus.vs.Bos                                  | Bos.vs.Pteropus.vs.Tursiops                                  | 1              | 0            |
| <b>Convergent:</b> | 0                                                            | 1                                                            |                |              |
| <b>Comparable:</b> | 670                                                          | 670                                                          |                |              |
|                    | Tursiops.vs.Eidolon.vs.Bos                                   | Bos.vs.Eidolon.vs.Tursiops                                   | 1              | 0            |
| <b>Convergent:</b> | 0                                                            | 1                                                            |                |              |
| <b>Comparable:</b> | 607                                                          | 607                                                          |                |              |

|                    | Species 1: Species 2 & not Species 3 or Consensus | Species 3: Species 2 & not Species 1 or Consensus | P-value | Ratio       |
|--------------------|---------------------------------------------------|---------------------------------------------------|---------|-------------|
|                    | Tursiops.vs.Mus.vs.Bos                            | Bos.vs.Mus.vs.Tursiops                            | 1       | 1           |
| <b>Convergent:</b> | 2                                                 | 2                                                 |         |             |
| <b>Comparable:</b> | 671                                               | 671                                               |         |             |
|                    | Tursiops.vs.Oryctolagus.vs.Bos                    | Bos.vs.Oryctolagus.vs.Tursiops                    | 0.4996  | 0           |
| <b>Convergent:</b> | 0                                                 | 2                                                 |         |             |
| <b>Comparable:</b> | 671                                               | 671                                               |         |             |
|                    | Tursiops.vs.Loxodonta.vs.Bos                      | Bos.vs.Loxodonta.vs.Tursiops                      | 0.4996  | 0           |
| <b>Convergent:</b> | 0                                                 | 2                                                 |         |             |
| <b>Comparable:</b> | 668                                               | 668                                               |         |             |
|                    | Mus.vs.Daubentonia.vs.Oryctolagus                 | Oryctolagus.vs.Daubentonia.vs.Mus                 | 0.6244  | 0.333333333 |
| <b>Convergent:</b> | 1                                                 | 3                                                 |         |             |
| <b>Comparable:</b> | 664                                               | 664                                               |         |             |
|                    | Mus.vs.Propithecus.vs.Oryctolagus                 | Oryctolagus.vs.Propithecus.vs.Mus                 | 1       | 0.5         |
| <b>Convergent:</b> | 1                                                 | 2                                                 |         |             |
| <b>Comparable:</b> | 656                                               | 656                                               |         |             |
|                    | Mus.vs.Homo.vs.Oryctolagus                        | Oryctolagus.vs.Homo.vs.Mus                        | 1       | 0.5         |
| <b>Convergent:</b> | 1                                                 | 2                                                 |         |             |
| <b>Comparable:</b> | 671                                               | 671                                               |         |             |
|                    | Mus.vs.Pteronotus.vs.Oryctolagus                  | Oryctolagus.vs.Pteronotus.vs.Mus                  | 1       | 0.5         |
| <b>Convergent:</b> | 1                                                 | 2                                                 |         |             |
| <b>Comparable:</b> | 665                                               | 665                                               |         |             |
|                    | Mus.vs.Myotis.vs.Oryctolagus                      | Oryctolagus.vs.Myotis.vs.Mus                      | 0.3741  | 4           |
| <b>Convergent:</b> | 4                                                 | 1                                                 |         |             |
| <b>Comparable:</b> | 671                                               | 671                                               |         |             |
|                    | Mus.vs.Rhinolophus.vs.Oryctolagus                 | Oryctolagus.vs.Rhinolophus.vs.Mus                 | 0.6244  | 0.333333333 |
| <b>Convergent:</b> | 1                                                 | 3                                                 |         |             |
| <b>Comparable:</b> | 671                                               | 671                                               |         |             |
|                    | Mus.vs.Megaderma.vs.Oryctolagus                   | Oryctolagus.vs.Megaderma.vs.Mus                   | 0.4996  | N/A         |
| <b>Convergent:</b> | 2                                                 | 0                                                 |         |             |
| <b>Comparable:</b> | 671                                               | 671                                               |         |             |

|                    | <b>Species 1: Species 2 &amp; not Species 3 or Consensus</b> | <b>Species 3: Species 2 &amp; not Species 1 or Consensus</b> | <b>P-value</b> | <b>Ratio</b> |
|--------------------|--------------------------------------------------------------|--------------------------------------------------------------|----------------|--------------|
|                    | Mus.vs.Pteropus.vs.Oryctolagus                               | Oryctolagus.vs.Pteropus.vs.Mus                               | 1              | N/A          |
| <b>Convergent:</b> | 0                                                            | 0                                                            |                |              |
| <b>Comparable:</b> | 670                                                          | 670                                                          |                |              |
|                    | Mus.vs.Eidolon.vs.Oryctolagus                                | Oryctolagus.vs.Eidolon.vs.Mus                                | 1              | N/A          |
| <b>Convergent:</b> | 0                                                            | 0                                                            |                |              |
| <b>Comparable:</b> | 607                                                          | 607                                                          |                |              |
|                    | Mus.vs.Tursiops.vs.Oryctolagus                               | Oryctolagus.vs.Tursiops.vs.Mus                               | 1              | 1            |
| <b>Convergent:</b> | 2                                                            | 2                                                            |                |              |
| <b>Comparable:</b> | 671                                                          | 671                                                          |                |              |
|                    | Mus.vs.Bos.vs.Oryctolagus                                    | Oryctolagus.vs.Bos.vs.Mus                                    | 0.4996         | 0            |
| <b>Convergent:</b> | 0                                                            | 2                                                            |                |              |
| <b>Comparable:</b> | 671                                                          | 671                                                          |                |              |
|                    | Mus.vs.Loiodonta.vs.Oryctolagus                              | Oryctolagus.vs.Loiodonta.vs.Mus                              | 0.4996         | 0            |
| <b>Convergent:</b> | 0                                                            | 2                                                            |                |              |
| <b>Comparable:</b> | 668                                                          | 668                                                          |                |              |

# TMC1

|                    | Species 1: Species 2 & not Species 3 or Consensus | Species 3: Species 2 & not Species 1 or Consensus | P-value | Ratio |
|--------------------|---------------------------------------------------|---------------------------------------------------|---------|-------|
|                    | Daubentonia.vs.Homo.vs.Propithecus                | Propithecus.vs.Homo.vs.Daubentonia                | 1       | N/A   |
| <b>Convergent:</b> | 1                                                 | 0                                                 |         |       |
| <b>Comparable:</b> | 607                                               | 607                                               |         |       |
|                    | Daubentonia.vs.Pteronotus.vs.Propithecus          | Propithecus.vs.Pteronotus.vs.Daubentonia          | 1       | 1     |
| <b>Convergent:</b> | 1                                                 | 1                                                 |         |       |
| <b>Comparable:</b> | 604                                               | 604                                               |         |       |
|                    | Daubentonia.vs.Myotis.vs.Propithecus              | Propithecus.vs.Myotis.vs.Daubentonia              | 0.4996  | 0     |
| <b>Convergent:</b> | 0                                                 | 2                                                 |         |       |
| <b>Comparable:</b> | 607                                               | 607                                               |         |       |
|                    | Daubentonia.vs.Megaderma.vs.Propithecus           | Propithecus.vs.Megaderma.vs.Daubentonia           | 1       | 1     |
| <b>Convergent:</b> | 1                                                 | 1                                                 |         |       |
| <b>Comparable:</b> | 446                                               | 446                                               |         |       |
|                    | Daubentonia.vs.Rhinolophus.vs.Propithecus         | Propithecus.vs.Rhinolophus.vs.Daubentonia         | 1       | 1     |
| <b>Convergent:</b> | 1                                                 | 1                                                 |         |       |
| <b>Comparable:</b> | 446                                               | 446                                               |         |       |
|                    | Daubentonia.vs.Pteropus.vs.Propithecus            | Propithecus.vs.Pteropus.vs.Daubentonia            | 1       | N/A   |
| <b>Convergent:</b> | 0                                                 | 0                                                 |         |       |
| <b>Comparable:</b> | 583                                               | 583                                               |         |       |
|                    | Daubentonia.vs.Eidolon.vs.Propithecus             | Propithecus.vs.Eidolon.vs.Daubentonia             | 1       | N/A   |
| <b>Convergent:</b> | 0                                                 | 0                                                 |         |       |
| <b>Comparable:</b> | 604                                               | 604                                               |         |       |
|                    | Daubentonia.vs.Tursiops.vs.Propithecus            | Propithecus.vs.Tursiops.vs.Daubentonia            | 1       | N/A   |
| <b>Convergent:</b> | 0                                                 | 0                                                 |         |       |
| <b>Comparable:</b> | 593                                               | 593                                               |         |       |
|                    | Daubentonia.vs.Bos.vs.Propithecus                 | Propithecus.vs.Bos.vs.Daubentonia                 | 1       | N/A   |
| <b>Convergent:</b> | 1                                                 | 0                                                 |         |       |
| <b>Comparable:</b> | 607                                               | 607                                               |         |       |



|                    | <b>Species 1: Species 2 &amp; not Species 3 or Consensus</b> | <b>Species 3: Species 2 &amp; not Species 1 or Consensus</b> | <b>P-value</b> | <b>Ratio</b> |
|--------------------|--------------------------------------------------------------|--------------------------------------------------------------|----------------|--------------|
|                    | Daubentonia.vs.Mus.vs.Propithecus                            | Propithecus.vs.Mus.vs.Daubentonia                            | 1              | 0            |
| <b>Convergent:</b> | 0                                                            | 1                                                            |                |              |
| <b>Comparable:</b> | 607                                                          | 607                                                          |                |              |
|                    | Daubentonia.vs.Oryctolagus.vs.Propithecus                    | Propithecus.vs.Oryctolagus.vs.Daubentonia                    | 1              | N/A          |
| <b>Convergent:</b> | 1                                                            | 0                                                            |                |              |
| <b>Comparable:</b> | 607                                                          | 607                                                          |                |              |
|                    | Megaderma.vs.Daubentonia.vs.Pteropus                         | Pteropus.vs.Daubentonia.vs.Megaderma                         | 1              | N/A          |
| <b>Convergent:</b> | 1                                                            | 0                                                            |                |              |
| <b>Comparable:</b> | 457                                                          | 457                                                          |                |              |
|                    | Megaderma.vs.Daubentonia.vs.Eidolon                          | Eidolon.vs.Daubentonia.vs.Megaderma                          | 1              | N/A          |
| <b>Convergent:</b> | 1                                                            | 0                                                            |                |              |
| <b>Comparable:</b> | 478                                                          | 478                                                          |                |              |
|                    | Megaderma.vs.Propithecus.vs.Pteropus                         | Pteropus.vs.Propithecus.vs.Megaderma                         | 1              | N/A          |
| <b>Convergent:</b> | 1                                                            | 0                                                            |                |              |
| <b>Comparable:</b> | 460                                                          | 460                                                          |                |              |
|                    | Megaderma.vs.Propithecus.vs.Eidolon                          | Eidolon.vs.Propithecus.vs.Megaderma                          | 1              | N/A          |
| <b>Convergent:</b> | 1                                                            | 0                                                            |                |              |
| <b>Comparable:</b> | 481                                                          | 481                                                          |                |              |
|                    | Megaderma.vs.Homo.vs.Pteropus                                | Pteropus.vs.Homo.vs.Megaderma                                | 1              | N/A          |
| <b>Convergent:</b> | 0                                                            | 0                                                            |                |              |
| <b>Comparable:</b> | 512                                                          | 512                                                          |                |              |
|                    | Megaderma.vs.Homo.vs.Eidolon                                 | Eidolon.vs.Homo.vs.Megaderma                                 | 1              | N/A          |
| <b>Convergent:</b> | 0                                                            | 0                                                            |                |              |
| <b>Comparable:</b> | 533                                                          | 533                                                          |                |              |
|                    | Megaderma.vs.Pteronotus.vs.Pteropus                          | Pteropus.vs.Pteronotus.vs.Megaderma                          | 0.6243         | 3            |
| <b>Convergent:</b> | 3                                                            | 1                                                            |                |              |
| <b>Comparable:</b> | 510                                                          | 510                                                          |                |              |
|                    | Megaderma.vs.Pteronotus.vs.Eidolon                           | Eidolon.vs.Pteronotus.vs.Megaderma                           | 0.2493         | N/A          |
| <b>Convergent:</b> | 3                                                            | 0                                                            |                |              |
| <b>Comparable:</b> | 532                                                          | 532                                                          |                |              |

|                    | Species 1: Species 2 & not Species 3 or Consensus | Species 3: Species 2 & not Species 1 or Consensus | P-value  | Ratio |
|--------------------|---------------------------------------------------|---------------------------------------------------|----------|-------|
|                    | Megaderma.vs.Myotis.vs.Pteropus                   | Pteropus.vs.Myotis.vs.Megaderma                   | 0.3738   | 4     |
| <b>Convergent:</b> | 4                                                 | 1                                                 |          |       |
| <b>Comparable:</b> | 512                                               | 512                                               |          |       |
|                    | Megaderma.vs.Myotis.vs.Eidolon                    | Eidolon.vs.Myotis.vs.Megaderma                    | 0.3738   | 4     |
| <b>Convergent:</b> | 4                                                 | 1                                                 |          |       |
| <b>Comparable:</b> | 533                                               | 533                                               |          |       |
|                    | Megaderma.vs.Rhinolophus.vs.Pteropus              | Pteropus.vs.Rhinolophus.vs.Megaderma              | 3.98E-12 | N/A   |
| <b>Convergent:</b> | 39                                                | 0                                                 |          |       |
| <b>Comparable:</b> | 512                                               | 512                                               |          |       |
|                    | Megaderma.vs.Rhinolophus.vs.Eidolon               | Eidolon.vs.Rhinolophus.vs.Megaderma               | 3.90E-12 | N/A   |
| <b>Convergent:</b> | 39                                                | 0                                                 |          |       |
| <b>Comparable:</b> | 533                                               | 533                                               |          |       |
|                    | Megaderma.vs.Pteropus.vs.Eidolon                  | Eidolon.vs.Pteropus.vs.Megaderma                  | 0.4995   | 0     |
| <b>Convergent:</b> | 0                                                 | 2                                                 |          |       |
| <b>Comparable:</b> | 509                                               | 509                                               |          |       |
|                    | Megaderma.vs.Eidolon.vs.Pteropus                  | Pteropus.vs.Eidolon.vs.Megaderma                  | 0.4995   | 0     |
| <b>Convergent:</b> | 0                                                 | 2                                                 |          |       |
| <b>Comparable:</b> | 509                                               | 509                                               |          |       |
|                    | Megaderma.vs.Tursiops.vs.Pteropus                 | Pteropus.vs.Tursiops.vs.Megaderma                 | 0.4995   | N/A   |
| <b>Convergent:</b> | 2                                                 | 0                                                 |          |       |
| <b>Comparable:</b> | 497                                               | 497                                               |          |       |
|                    | Megaderma.vs.Tursiops.vs.Eidolon                  | Eidolon.vs.Tursiops.vs.Megaderma                  | 0.4995   | N/A   |
| <b>Convergent:</b> | 2                                                 | 0                                                 |          |       |
| <b>Comparable:</b> | 519                                               | 519                                               |          |       |
|                    | Megaderma.vs.Bos.vs.Pteropus                      | Pteropus.vs.Bos.vs.Megaderma                      | 1        | 0     |
| <b>Convergent:</b> | 0                                                 | 1                                                 |          |       |
| <b>Comparable:</b> | 512                                               | 512                                               |          |       |
|                    | Megaderma.vs.Bos.vs.Eidolon                       | Eidolon.vs.Bos.vs.Megaderma                       | 1        | N/A   |
| <b>Convergent:</b> | 0                                                 | 0                                                 |          |       |
| <b>Comparable:</b> | 533                                               | 533                                               |          |       |

|                    | <b>Species 1: Species 2 &amp; not Species 3 or Consensus</b> | <b>Species 3: Species 2 &amp; not Species 1 or Consensus</b> | <b>P-value</b> | <b>Ratio</b> |
|--------------------|--------------------------------------------------------------|--------------------------------------------------------------|----------------|--------------|
|                    | Megaderma.vs.Mus.vs.Pteropus                                 | Pteropus.vs.Mus.vs.Megaderma                                 | 1              | 1.5          |
| <b>Convergent:</b> | 3                                                            | 2                                                            |                |              |
| <b>Comparable:</b> | 512                                                          | 512                                                          |                |              |
|                    | Megaderma.vs.Mus.vs.Eidolon                                  | Eidolon.vs.Mus.vs.Megaderma                                  | 0.6243         | 3            |
| <b>Convergent:</b> | 3                                                            | 1                                                            |                |              |
| <b>Comparable:</b> | 533                                                          | 533                                                          |                |              |
|                    | Megaderma.vs.Oryctolagus.vs.Pteropus                         | Pteropus.vs.Oryctolagus.vs.Megaderma                         | 1              | 2            |
| <b>Convergent:</b> | 2                                                            | 1                                                            |                |              |
| <b>Comparable:</b> | 512                                                          | 512                                                          |                |              |
|                    | Megaderma.vs.Oryctolagus.vs.Eidolon                          | Eidolon.vs.Oryctolagus.vs.Megaderma                          | 1              | 2            |
| <b>Convergent:</b> | 2                                                            | 1                                                            |                |              |
| <b>Comparable:</b> | 533                                                          | 533                                                          |                |              |
|                    | Rhinolophus.vs.Daubentonia.vs.Pteropus                       | Pteropus.vs.Daubentonia.vs.Rhinolophus                       | 1              | N/A          |
| <b>Convergent:</b> | 1                                                            | 0                                                            |                |              |
| <b>Comparable:</b> | 457                                                          | 457                                                          |                |              |
|                    | Rhinolophus.vs.Daubentonia.vs.Eidolon                        | Eidolon.vs.Daubentonia.vs.Rhinolophus                        | 1              | N/A          |
| <b>Convergent:</b> | 1                                                            | 0                                                            |                |              |
| <b>Comparable:</b> | 478                                                          | 478                                                          |                |              |
|                    | Rhinolophus.vs.Propithecus.vs.Pteropus                       | Pteropus.vs.Propithecus.vs.Rhinolophus                       | 1              | N/A          |
| <b>Convergent:</b> | 1                                                            | 0                                                            |                |              |
| <b>Comparable:</b> | 460                                                          | 460                                                          |                |              |
|                    | Rhinolophus.vs.Propithecus.vs.Eidolon                        | Eidolon.vs.Propithecus.vs.Rhinolophus                        | 1              | N/A          |
| <b>Convergent:</b> | 1                                                            | 0                                                            |                |              |
| <b>Comparable:</b> | 481                                                          | 481                                                          |                |              |
|                    | Rhinolophus.vs.Homo.vs.Pteropus                              | Pteropus.vs.Homo.vs.Rhinolophus                              | 1              | N/A          |
| <b>Convergent:</b> | 0                                                            | 0                                                            |                |              |
| <b>Comparable:</b> | 512                                                          | 512                                                          |                |              |
|                    | Rhinolophus.vs.Homo.vs.Eidolon                               | Eidolon.vs.Homo.vs.Rhinolophus                               | 1              | N/A          |
| <b>Convergent:</b> | 0                                                            | 0                                                            |                |              |
| <b>Comparable:</b> | 533                                                          | 533                                                          |                |              |

|                    | <b>Species 1: Species 2 &amp; not Species 3 or Consensus</b> | <b>Species 3: Species 2 &amp; not Species 1 or Consensus</b> | <b>P-value</b> | <b>Ratio</b> |
|--------------------|--------------------------------------------------------------|--------------------------------------------------------------|----------------|--------------|
|                    | Rhinolophus.vs.Pteronotus.vs.Pteropus                        | Pteropus.vs.Pteronotus.vs.Rhinolophus                        | 0.6243         | 3            |
| <b>Convergent:</b> | 3                                                            | 1                                                            |                |              |
| <b>Comparable:</b> | 510                                                          | 510                                                          |                |              |
|                    | Rhinolophus.vs.Pteronotus.vs.Eidolon                         | Eidolon.vs.Pteronotus.vs.Rhinolophus                         | 0.2493         | N/A          |
| <b>Convergent:</b> | 3                                                            | 0                                                            |                |              |
| <b>Comparable:</b> | 532                                                          | 532                                                          |                |              |
|                    | Rhinolophus.vs.Myotis.vs.Pteropus                            | Pteropus.vs.Myotis.vs.Rhinolophus                            | 0.3738         | 4            |
| <b>Convergent:</b> | 4                                                            | 1                                                            |                |              |
| <b>Comparable:</b> | 512                                                          | 512                                                          |                |              |
|                    | Rhinolophus.vs.Myotis.vs.Eidolon                             | Eidolon.vs.Myotis.vs.Rhinolophus                             | 0.3738         | 4            |
| <b>Convergent:</b> | 4                                                            | 1                                                            |                |              |
| <b>Comparable:</b> | 533                                                          | 533                                                          |                |              |
|                    | Rhinolophus.vs.Megaderma.vs.Pteropus                         | Pteropus.vs.Megaderma.vs.Rhinolophus                         | 3.98E-12       | N/A          |
| <b>Convergent:</b> | 39                                                           | 0                                                            |                |              |
| <b>Comparable:</b> | 512                                                          | 512                                                          |                |              |
|                    | Rhinolophus.vs.Megaderma.vs.Eidolon                          | Eidolon.vs.Megaderma.vs.Rhinolophus                          | 3.90E-12       | N/A          |
| <b>Convergent:</b> | 39                                                           | 0                                                            |                |              |
| <b>Comparable:</b> | 533                                                          | 533                                                          |                |              |
|                    | Rhinolophus.vs.Pteropus.vs.Eidolon                           | Eidolon.vs.Pteropus.vs.Rhinolophus                           | 0.4995         | 0            |
| <b>Convergent:</b> | 0                                                            | 2                                                            |                |              |
| <b>Comparable:</b> | 509                                                          | 509                                                          |                |              |
|                    | Rhinolophus.vs.Eidolon.vs.Pteropus                           | Pteropus.vs.Eidolon.vs.Rhinolophus                           | 0.4995         | 0            |
| <b>Convergent:</b> | 0                                                            | 2                                                            |                |              |
| <b>Comparable:</b> | 509                                                          | 509                                                          |                |              |
|                    | Rhinolophus.vs.Tursiops.vs.Pteropus                          | Pteropus.vs.Tursiops.vs.Rhinolophus                          | 0.4995         | N/A          |
| <b>Convergent:</b> | 2                                                            | 0                                                            |                |              |
| <b>Comparable:</b> | 497                                                          | 497                                                          |                |              |
|                    | Rhinolophus.vs.Tursiops.vs.Eidolon                           | Eidolon.vs.Tursiops.vs.Rhinolophus                           | 0.4995         | N/A          |
| <b>Convergent:</b> | 2                                                            | 0                                                            |                |              |
| <b>Comparable:</b> | 519                                                          | 519                                                          |                |              |

|                    | <b>Species 1: Species 2 &amp; not Species 3 or Consensus</b> | <b>Species 3: Species 2 &amp; not Species 1 or Consensus</b> | <b>P-value</b> | <b>Ratio</b> |
|--------------------|--------------------------------------------------------------|--------------------------------------------------------------|----------------|--------------|
|                    | Rhinolophus.vs.Bos.vs.Pteropus                               | Pteropus.vs.Bos.vs.Rhinolophus                               | 1              | 0            |
| <b>Convergent:</b> | 0                                                            | 1                                                            |                |              |
| <b>Comparable:</b> | 512                                                          | 512                                                          |                |              |
|                    | Rhinolophus.vs.Bos.vs.Eidolon                                | Eidolon.vs.Bos.vs.Rhinolophus                                | 1              | N/A          |
| <b>Convergent:</b> | 0                                                            | 0                                                            |                |              |
| <b>Comparable:</b> | 533                                                          | 533                                                          |                |              |
|                    | Rhinolophus.vs.Mus.vs.Pteropus                               | Pteropus.vs.Mus.vs.Rhinolophus                               | 1              | 1.5          |
| <b>Convergent:</b> | 3                                                            | 2                                                            |                |              |
| <b>Comparable:</b> | 512                                                          | 512                                                          |                |              |
|                    | Rhinolophus.vs.Mus.vs.Eidolon                                | Eidolon.vs.Mus.vs.Rhinolophus                                | 0.6243         | 3            |
| <b>Convergent:</b> | 3                                                            | 1                                                            |                |              |
| <b>Comparable:</b> | 533                                                          | 533                                                          |                |              |
|                    | Rhinolophus.vs.Oryctolagus.vs.Pteropus                       | Pteropus.vs.Oryctolagus.vs.Rhinolophus                       | 1              | 2            |
| <b>Convergent:</b> | 2                                                            | 1                                                            |                |              |
| <b>Comparable:</b> | 512                                                          | 512                                                          |                |              |
|                    | Rhinolophus.vs.Oryctolagus.vs.Eidolon                        | Eidolon.vs.Oryctolagus.vs.Rhinolophus                        | 1              | 2            |
| <b>Convergent:</b> | 2                                                            | 1                                                            |                |              |
| <b>Comparable:</b> | 533                                                          | 533                                                          |                |              |
|                    | Tursiops.vs.Daubentonia.vs.Bos                               | Bos.vs.Daubentonia.vs.Tursiops                               | 1              | 0            |
| <b>Convergent:</b> | 0                                                            | 1                                                            |                |              |
| <b>Comparable:</b> | 634                                                          | 634                                                          |                |              |
|                    | Tursiops.vs.Propithecus.vs.Bos                               | Bos.vs.Propithecus.vs.Tursiops                               | 1              | N/A          |
| <b>Convergent:</b> | 0                                                            | 0                                                            |                |              |
| <b>Comparable:</b> | 631                                                          | 631                                                          |                |              |
|                    | Tursiops.vs.Homo.vs.Bos                                      | Bos.vs.Homo.vs.Tursiops                                      | 1              | N/A          |
| <b>Convergent:</b> | 1                                                            | 0                                                            |                |              |
| <b>Comparable:</b> | 689                                                          | 689                                                          |                |              |
|                    | Tursiops.vs.Pteronotus.vs.Bos                                | Bos.vs.Pteronotus.vs.Tursiops                                | 0.3741         | 4            |
| <b>Convergent:</b> | 4                                                            | 1                                                            |                |              |
| <b>Comparable:</b> | 686                                                          | 686                                                          |                |              |

|                    | Species 1: Species 2 & not Species 3 or Consensus | Species 3: Species 2 & not Species 1 or Consensus | P-value | Ratio |
|--------------------|---------------------------------------------------|---------------------------------------------------|---------|-------|
|                    | Tursiops.vs.Myotis.vs.Bos                         | Bos.vs.Myotis.vs.Tursiops                         | 0.2495  | N/A   |
| <b>Convergent:</b> | 3                                                 | 0                                                 |         |       |
| <b>Comparable:</b> | 689                                               | 689                                               |         |       |
|                    | Tursiops.vs.Megaderma.vs.Bos                      | Bos.vs.Megaderma.vs.Tursiops                      | 0.4995  | N/A   |
| <b>Convergent:</b> | 2                                                 | 0                                                 |         |       |
| <b>Comparable:</b> | 521                                               | 521                                               |         |       |
|                    | Tursiops.vs.Rhinolophus.vs.Bos                    | Bos.vs.Rhinolophus.vs.Tursiops                    | 0.4995  | N/A   |
| <b>Convergent:</b> | 2                                                 | 0                                                 |         |       |
| <b>Comparable:</b> | 521                                               | 521                                               |         |       |
|                    | Tursiops.vs.Pteropus.vs.Bos                       | Bos.vs.Pteropus.vs.Tursiops                       | 1       | 0     |
| <b>Convergent:</b> | 0                                                 | 1                                                 |         |       |
| <b>Comparable:</b> | 665                                               | 665                                               |         |       |
|                    | Tursiops.vs.Eidolon.vs.Bos                        | Bos.vs.Eidolon.vs.Tursiops                        | 1       | N/A   |
| <b>Convergent:</b> | 0                                                 | 0                                                 |         |       |
| <b>Comparable:</b> | 687                                               | 687                                               |         |       |
|                    | Tursiops.vs.Mus.vs.Bos                            | Bos.vs.Mus.vs.Tursiops                            | 0.6245  | 3     |
| <b>Convergent:</b> | 3                                                 | 1                                                 |         |       |
| <b>Comparable:</b> | 689                                               | 689                                               |         |       |
|                    | Tursiops.vs.Oryctolagus.vs.Bos                    | Bos.vs.Oryctolagus.vs.Tursiops                    | 1       | 1     |
| <b>Convergent:</b> | 1                                                 | 1                                                 |         |       |
| <b>Comparable:</b> | 689                                               | 689                                               |         |       |
|                    | Mus.vs.Daubentonia.vs.Oryctolagus                 | Oryctolagus.vs.Daubentonia.vs.Mus                 | 1       | 0     |
| <b>Convergent:</b> | 0                                                 | 1                                                 |         |       |
| <b>Comparable:</b> | 649                                               | 649                                               |         |       |
|                    | Mus.vs.Propithecus.vs.Oryctolagus                 | Oryctolagus.vs.Propithecus.vs.Mus                 | 1       | N/A   |
| <b>Convergent:</b> | 1                                                 | 0                                                 |         |       |
| <b>Comparable:</b> | 645                                               | 645                                               |         |       |
|                    | Mus.vs.Homo.vs.Oryctolagus                        | Oryctolagus.vs.Homo.vs.Mus                        | 1       | N/A   |
| <b>Convergent:</b> | 1                                                 | 0                                                 |         |       |
| <b>Comparable:</b> | 704                                               | 704                                               |         |       |

|                    | Species 1: Species 2 & not Species 3 or Consensus | Species 3: Species 2 & not Species 1 or Consensus | P-value | Ratio |
|--------------------|---------------------------------------------------|---------------------------------------------------|---------|-------|
|                    | Mus.vs.Pteronotus.vs.Oryctolagus                  | Oryctolagus.vs.Pteronotus.vs.Mus                  | 0.4996  | N/A   |
| <b>Convergent:</b> | 2                                                 | 0                                                 |         |       |
| <b>Comparable:</b> | 701                                               | 701                                               |         |       |
|                    | Mus.vs.Myotis.vs.Oryctolagus                      | Oryctolagus.vs.Myotis.vs.Mus                      | 0.4996  | N/A   |
| <b>Convergent:</b> | 2                                                 | 0                                                 |         |       |
| <b>Comparable:</b> | 704                                               | 704                                               |         |       |
|                    | Mus.vs.Megaderma.vs.Oryctolagus                   | Oryctolagus.vs.Megaderma.vs.Mus                   | 1       | N/A   |
| <b>Convergent:</b> | 1                                                 | 0                                                 |         |       |
| <b>Comparable:</b> | 536                                               | 536                                               |         |       |
|                    | Mus.vs.Rhinolophus.vs.Oryctolagus                 | Oryctolagus.vs.Rhinolophus.vs.Mus                 | 1       | N/A   |
| <b>Convergent:</b> | 1                                                 | 0                                                 |         |       |
| <b>Comparable:</b> | 536                                               | 536                                               |         |       |
|                    | Mus.vs.Pteropus.vs.Oryctolagus                    | Oryctolagus.vs.Pteropus.vs.Mus                    | 1       | 2     |
| <b>Convergent:</b> | 2                                                 | 1                                                 |         |       |
| <b>Comparable:</b> | 680                                               | 680                                               |         |       |
|                    | Mus.vs.Eidolon.vs.Oryctolagus                     | Oryctolagus.vs.Eidolon.vs.Mus                     | 1       | 1     |
| <b>Convergent:</b> | 1                                                 | 1                                                 |         |       |
| <b>Comparable:</b> | 701                                               | 701                                               |         |       |
|                    | Mus.vs.Tursiops.vs.Oryctolagus                    | Oryctolagus.vs.Tursiops.vs.Mus                    | 0.2495  | N/A   |
| <b>Convergent:</b> | 3                                                 | 0                                                 |         |       |
| <b>Comparable:</b> | 689                                               | 689                                               |         |       |
|                    | Mus.vs.Bos.vs.Oryctolagus                         | Oryctolagus.vs.Bos.vs.Mus                         | 1       | 2     |
| <b>Convergent:</b> | 2                                                 | 1                                                 |         |       |
| <b>Comparable:</b> | 704                                               | 704                                               |         |       |

<sup>i</sup> Because *Megaderma* and *Rhinolophus* are more closely related than other bat species in the alignment, as are *Pteropus* and *Eidolon*, we were unable to compare them using this method and they do not appear in this table.
