# Supplementary material for: Testing Convergent Evolution in Auditory Processing Genes between Echolocating Mammals and the Aye-Aye, a Percussive-Foraging Primate
Source: PubMed Central journal article supplement — Genome Biol Evol. 2017 Jul 26;9(7):1978–89. doi: 10.1093/gbe/evx140 (PMC5553384; doi:10.1093/gbe/evx140), 2017-07-26
Supplement: evx140_SuppTable_3.pdf [file evx140_SuppTable_3.pdf]

Bankoff *et al.* Supplemental Table 3

| <b>Gene</b>    | <b>Nucleotides excluded</b><br><i>Daubentonia</i> | <b>Nucleotides excluded</b><br><i>Propithecus</i> |
|----------------|---------------------------------------------------|---------------------------------------------------|
| <b>CDH23</b>   | 150                                               | 1250                                              |
| <b>KCNQ4</b>   | 0                                                 | 150                                               |
| <b>OTOF</b>    | 0                                                 | 50                                                |
| <b>PCDH15</b>  | 0                                                 | 100                                               |
| <b>PJVK</b>    | 0                                                 | 0                                                 |
| <b>SLC26A5</b> | 0                                                 | 0                                                 |
| <b>TMC1</b>    | 150                                               | 150                                               |

Supplemental Table 3. Number of nucleotides masked for exceeding sample average coverage by two standard deviations or more.
