# Supplementary material for: Testing Convergent Evolution in Auditory Processing Genes between Echolocating Mammals and the Aye-Aye, a Percussive-Foraging Primate
Source: PubMed Central journal article supplement — Genome Biol Evol. 2017 Jul 26;9(7):1978–89. doi: 10.1093/gbe/evx140 (PMC5553384; doi:10.1093/gbe/evx140), 2017-07-26
Supplement: evx140_SuppTable_4.pdf [file evx140_SuppTable_4.pdf]

Bankoff *et al.* Supplemental Table 4

| <b>Gene</b>    | <b>Nucleotides excluded from<br/>BLAST hits</b> |
|----------------|-------------------------------------------------|
| <b>CDH23</b>   | 769                                             |
| <b>KCNQ4</b>   | 217                                             |
| <b>OTOF</b>    | 389                                             |
| <b>PCDH15</b>  | 473                                             |
| <b>PJKV</b>    | 0                                               |
| <b>SLC26A5</b> | 296                                             |
| <b>TMC1</b>    | 1047                                            |

**Supplemental Table 4.** Number of nucleotides excluded from BLAST hits used in calculating percent coverage in Table 2 for each gene of interest.
